# Supplementary material for: Carbon accounting of pig manure management with a focus on China – discrepancies and recommendations
Source: Royal Society of Chemistry journal article supplement (doi:10.1039/d5va00248f), 2026-01-01
Supplement: d5va00248f1.xlsx [file d5va00248f1.xlsx]

## Sheet: Title Sheet
Table of Contents
Tab #	Title	Description
1	List of references	An overview of included 60 literature in this review
2	Carbon accounting methods	An overview of manure management carbon accounting methods used on the literature
3	Reference list of EF database	An overview of included 31 literature in manure management system emission factor database
4	Chinese EF database	An overview of included manure management system EF value in this database
5	Sample points data	Climatic data and soil physicochemical data of different soil sample points.

## Sheet: List of references 
Number	Authors	Year	Title	Journal
1	X. W. Wang, X. B. Dong, X. C. Wang, P. Zhang, R. R. Liu, J. J. Klemes, et al.	2022	A life cycle assessment of an enterprise's low-carbon emissions model: The Xinjiang Shihezi pig farm faecal treatment biogas project as a case study	JOURNAL OF ENVIRONMENTAL MANAGEMENT
2	S. Zira, L. Rydhmer, E. Ivarsson, R. Hoffmann and E. Roos	2021	A life cycle sustainability assessment of organic and conventional pork supply chains in Sweden	SUSTAINABLE PRODUCTION AND CONSUMPTION
3	G. Zheng, M. Li, Y. Shen, B. Yu, T. Chen and X. Liu	2021	Environmental impact and adaptation study of pig farming relocation in China	Environmental Impact Assessment Review
4	Y. Z. Zhang, Y. Jiang, S. Wang, Z. Z. Wang, Y. C. Liu, Z. H. Hu, et al.	2021	Environmental sustainability assessment of pig manure mono- and co-digestion and dynamic land application of the digestate	RENEWABLE & SUSTAINABLE ENERGY REVIEWS
5	M. L. Pazmino and A. D. Ramirez	2021	Life Cycle Assessment as a Methodological Framework for the Evaluation of the Environmental Sustainability of Pig and Pork Production in Ecuador	SUSTAINABILITY
6	B. Meda, F. Garcia-Launay, L. Dusart, P. Ponchant, S. Espagnol and A. Wilfart	2021	Reducing environmental impacts of feed using multiobjective formulation: What benefits at the farm gate for pig and broiler production?	ANIMAL
7	W. T. Long, H. L. Wang, Y. Hou, D. Chadwick, Y. F. Ma, Z. L. Cui, et al.	2021	Mitigation of Multiple Environmental Footprints for China's Pig Production Using Different Land Use Strategies	ENVIRONMENTAL SCIENCE & TECHNOLOGY
8	X. Liu, Z. C. Cai and Z. W. Yuan	2021	Environmental burdens of small-scale intensive pig production in China	SCIENCE OF THE TOTAL ENVIRONMENT
9	Q. Li, M. Gao and J. Li	2021	Carbon emissions inventory of farm size pig husbandry combining Manure-DNDC model and IPCC coefficient methodology	Journal of Cleaner Production
10	Y. Jiang, Y. Z. Zhang, S. Wang, Z. Z. Wang, Y. C. Liu, Z. H. Hu, et al.	2021	Improved environmental sustainability and bioenergy recovery through pig manure and food waste on-farm co-digestion in Ireland	JOURNAL OF CLEANER PRODUCTION
11	C. E. Hollas, A. C. Bolsan, A. Chini, B. Venturin, G. Bonassa, D. Ca, et al.	2021	Effects of swine manure storage time on solid-liquid separation and biogas production: A life-cycle assessment approach	RENEWABLE & SUSTAINABLE ENERGY REVIEWS
12	M. R. Giraldi-Diaz, E. Castillo-Gonzalez, L. De Medina-Salas, R. Velasquez-De la Cruz and H. D. Huerta-Silva	2021	Environmental Impacts Associated with Intensive Production in Pig Farms in Mexico through Life Cycle Assessment	SUSTAINABILITY
13	L. A. C. Esteves, A. Monteiro, N. Y. Sitanaka, P. C. Oliveira, L. D. Castilha, V. R. C. Paula, et al.	2021	The Reduction of Crude Protein with the Supplementation of Amino Acids in the Diet Reduces the Environmental Impact of Growing Pigs Production Evaluated through Life Cycle Assessment	SUSTAINABILITY
14	T. Dorca-Preda, L. Mogensen, T. Kristensen and M. T. Knudsen	2021	Environmental impact of Danish pork at slaughterhouse gate-a life cycle assessment following biological and technological changes over a 10-year period	LIVESTOCK SCIENCE
15	C. Conti, M. Costantini, A. Fusi, A. Manzardo, M. Guarino and J. Bacenetti	2021	Environmental impact of pig production affected by wet acid scrubber as mitigation technology	SUSTAINABLE PRODUCTION AND CONSUMPTION
16	X. W. Chen, Y. Chen, X. X. Liu, Y. L. Li and X. L. Wang	2021	Investigating historical dynamics and mitigation scenarios of anthropogenic greenhouse gas emissions from pig production system in China	JOURNAL OF CLEANER PRODUCTION
17	W. Wu, L. C. Cheng and J. S. Chang	2020	Environmental life cycle comparisons of pig farming integrated with anaerobic digestion and algae-based wastewater treatment	JOURNAL OF ENVIRONMENTAL MANAGEMENT
18	J. Tallaksen, L. Johnston, K. Sharpe, M. Reese and E. Buchanan	2020	Reducing life cycle fossil energy and greenhouse gas emissions for Midwest swine production systems	JOURNAL OF CLEANER PRODUCTION
19	M. E. Ramirez-Islas, L. P. Guereca, F. S. Sosa-Rodriguez and M. A. Cobos-Peralta	2020	Environmental assessment of energy production from anaerobic digestion of pig manure at medium-scale using life cycle assessment	WASTE MANAGEMENT
20	G. Pexas, S. G. Mackenzie, M. Wallace and I. Kyriazakis	2020	Environmental impacts of housing conditions and manure management in European pig production systems through a life cycle perspective: A case study in Denmark	JOURNAL OF CLEANER PRODUCTION
21	S. J. Hortenhuber, G. Schauberger, C. Mikovits, M. Schonhart, J. Baumgartner, K. Niebuhr, et al.	2020	The Effect of Climate Change-Induced Temperature Increase on Performance and Environmental Impact of Intensive Pig Production Systems	SUSTAINABILITY
22	J. Garcia-Gudino, A. Monteiro, S. Espagnol, I. Blanco-Penedo and F. Garcia-Launay	2020	Life Cycle Assessment of Iberian Traditional Pig Production System in Spain	SUSTAINABILITY
23	N. Duan, B. Khoshnevisan, C. Lin, Z. D. Liu and H. B. Liu	2020	Life cycle assessment of anaerobic digestion of pig manure coupled with different digestate treatment technologies	ENVIRONMENT INTERNATIONAL
24	A. Bonou, T. A. Colley, M. Z. Hauschild, S. I. Olsen and M. Birkved	2020	Life cycle assessment of Danish pork exports using different cooling technologies and comparison of upstream supply chain efficiencies between Denmark, China and Australia	JOURNAL OF CLEANER PRODUCTION
25	P. T. Benavides, H. Cai, M. Wang and N. Bajjalieh	2020	Life-cycle analysis of soybean meal, distiller-dried grains with solubles, and synthetic amino acid-based animal feeds for swine and poultry production	ANIMAL FEED SCIENCE AND TECHNOLOGY
26	V. Anestis, D. K. Papanastasiou, T. Bartzanas, I. Giannenas, I. Skoufos and C. Kittas	2020	Effect of a dietary modification for fattening pigs on the environmental performance of commercial pig production in Greece	SUSTAINABLE PRODUCTION AND CONSUMPTION
27	M. Sharara, D. Kim, S. Sadaka and G. Thoma	2019	Consequential Life Cycle Assessment of Swine Manure Management within a Thermal Gasification Scenario	ENERGIES
28	Y. A. Reyes, E. L. Barrera, A. S. Valle, M. P. Gil, O. H. Garcia and J. Dewulf	2019	Life Cycle Assessment for the Cuban pig production: Case study in Sancti Spiritus	JOURNAL OF CLEANER PRODUCTION
29	A. Makara, Z. Kowalski, L. Lelek and J. Kulczycka	2019	Comparative analyses of pig farming management systems using the Life Cycle Assessment method	JOURNAL OF CLEANER PRODUCTION
30	E. M. Arrieta and A. D. Gonzalez	2019	Energy and carbon footprints of chicken and pork from intensive production systems in Argentina	SCIENCE OF THE TOTAL ENVIRONMENT
31	Y. Q. Zhou, H. M. Dong, H. W. Xin, Z. Z. Zhu, W. Q. Huang and Y. Wang	2018	CARBON FOOTPRINT ASSESSMENT OF A LARGE-SCALE PIG PRODUCTION SYSTEM IN NORTHERN CHINA : A CASE STUDY	TRANSACTIONS OF THE ASABE
32	Z. W. Yuan, X. Pan, T. M. Chen, X. W. Liu, Y. Zhang, S. Y. Jiang, et al.	2018	Evaluating environmental impacts of pig slurry treatment technologies with a life-cycle perspective	JOURNAL OF CLEANER PRODUCTION
33	T. Wang, R. B. Liu, K. O'Meara, E. Mullan and Y. Q. Zhao	2018	Assessment of a Field Tidal Flow Constructed Wetland in Treatment of Swine Wastewater: Life Cycle Approach	WATER
34	H. H. E. van Zanten, P. Bikker, B. G. Meerburg and I. J. M. de Boer	2018	Attributional versus consequential life cycle assessment and feed optimization: alternative protein sources in pig diets	INTERNATIONAL JOURNAL OF LIFE CYCLE ASSESSMENT
35	G. Rudolph, S. Hortenhuber, D. Bochicchio, G. Butler, R. Brandhofer, S. Dippel, et al.	2018	Effect of Three Husbandry Systems on Environmental Impact of Organic Pigs	SUSTAINABILITY
36	T. Kuhn, L. Kokemohr and K. Holm-Muller	2018	A life cycle assessment of liquid pig manure transport in line with EU regulations: A case study from Germany	JOURNAL OF ENVIRONMENTAL MANAGEMENT
37	W. Fan, X. Dong, H. Wei, B. Weng, L. Liang, Z. Xu, et al.	2018	Is it true that the longer the extended industrial chain, the better the circular agriculture? A case study of circular agriculture industry company in Fuqing, Fujian	JOURNAL OF CLEANER PRODUCTION
38	L. Corbala-Robles, W. N. D. Sastafiana, V. Van Linden, E. I. P. Volcke and T. Schaubroeck	2018	Life cycle assessment of biological pig manure treatment versus direct land application - a trade-off story	RESOURCES CONSERVATION AND RECYCLING
39	I. Andretta, L. Hauschild, M. Kipper, P. G. S. Pires and C. Pomar	2018	Environmental impacts of precision feeding programs applied in pig production	ANIMAL
40	I. Noya, P. Villanueva-Rey, S. Gonzalez-Garcia, M. D. Fernandez, M. R. Rodriguez and M. T. Moreira	2017	Life Cycle Assessment of pig production: A case study in Galicia	JOURNAL OF CLEANER PRODUCTION
41	I. Noya, X. Aldea, S. Gonzalez-Garcia, C. M. Gasol, M. T. Moreira, M. J. Amores, et al.	2017	Environmental assessment of the entire pork value chain in Catalonia - A strategy to work towards Circular Economy	SCIENCE OF THE TOTAL ENVIRONMENT
42	L. Bava, M. Zucali, A. Sandrucci and A. Tamburini	2017	Environmental impact of the typical heavy pig production in Italy	JOURNAL OF CLEANER PRODUCTION
43	T. Winkler, K. Schopf, R. Aschemann and W. Winiwarter	2016	From farm to fork - A life cycle assessment of fresh Austrian pork	JOURNAL OF CLEANER PRODUCTION
44	X. Verge, D. Maxime, R. L. Desjardins and A. C. VanderZaag	2016	Allocation factors and issues in agricultural carbon footprint: a case study of the Canadian pork industry	JOURNAL OF CLEANER PRODUCTION
45	K. Reckmann, R. Blank, I. Traulsen and J. Krieter	2016	Comparative life cycle assessment (LCA) of pork using different protein sources in pig feed	ARCHIVES ANIMAL BREEDING
46	G. Pirlo, S. Care, G. Della Casa, R. Marchetti, G. Ponzoni, V. Faeti, et al.	2016	Environmental impact of heavy pig production in a sample of Italian farms. A cradle to farm-gate analysis	SCIENCE OF THE TOTAL ENVIRONMENT
47	A. Monteiro, F. Garcia-Launay, L. Brossard, A. Wilfart and J. Y. Dourmad	2016	Effect of feeding strategy on environmental impacts of pig fattening in different contexts of production: evaluation through life cycle assessment	JOURNAL OF ANIMAL SCIENCE
48	S. G. Mackenzie, I. Leinonen, N. Ferguson and I. Kyriazakis	2016	Can the environmental impact of pig systems be reduced by utilising co-products as feed?	JOURNAL OF CLEANER PRODUCTION
49	E. Kebreab, A. Liedke, D. Caro, S. Deimling, M. Binder and M. Finkbeiner	2016	Environmental impact of using specialty feed ingredients in swine and poultry production: A life cycle assessment	JOURNAL OF ANIMAL SCIENCE
50	E. A. Groen, H. H. E. van Zanten, R. Heijungs, E. A. M. Bokkers and I. J. M. de Boer	2016	Sensitivity analysis of greenhouse gas emissions from a pork production chain	JOURNAL OF CLEANER PRODUCTION
51	H. H. E. van Zanten, P. Bikker, H. Mollenhorst, B. G. Meerburg and I. J. M. de Boer	2015	Environmental impact of replacing soybean meal with rapeseed meal in diets of finishing pigs	ANIMAL
52	S. G. Mackenzie, I. Leinonen, N. Ferguson and I. Kyriazakis	2015	Accounting for uncertainty in the quantification of the environmental impacts of Canadian pig farming systems	JOURNAL OF ANIMAL SCIENCE
53	E. Cherubini, G. M. Zanghelini, J. M. R. Tavares, F. Belettini and S. R. Soares	2015	The finishing stage in swine production: influences of feed composition on carbon footprint	ENVIRONMENT DEVELOPMENT AND SUSTAINABILITY
54	E. Cherubini, G. M. Zanghelini, R. A. F. Alvarenga, D. Franco and S. R. Soares	2015	Life cycle assessment of swine production in Brazil: a comparison of four manure management systems	JOURNAL OF CLEANER PRODUCTION
55	M. ten Hoeve, N. J. Hutchings, G. M. Peters, M. Svanstrom, L. S. Jensen and S. Bruun	2014	Life cycle assessment of pig slurry treatment technologies for nutrient redistribution in Denmark	JOURNAL OF ENVIRONMENTAL MANAGEMENT
56	Y. M. Luo, H. Stichnothe, F. Schuchardt, G. X. Li, R. M. Huaitalla and W. Xu	2014	Life cycle assessment of manure management and nutrient recycling from a Chinese pig farm	WASTE MANAGEMENT & RESEARCH
57	J. Y. Dourmad, J. Ryschawy, T. Trousson, M. Bonneau, J. Gonzalez, H. W. J. Houwers, et al.	2014	Evaluating environmental impacts of contrasting pig farming systems with life cycle assessment	ANIMAL
58	D. Brockmann, M. Hanhoun, O. Negri and A. Helias	2014	Environmental assessment of nutrient recycling from biological pig slurry treatment - Impact of fertilizer substitution and field emissions	BIORESOURCE TECHNOLOGY
59	J. Zhong, Y. S. Wei, H. F. Wan, Y. L. Wu, J. X. Zheng, S. H. Han, et al.	2013	Greenhouse gas emission from the total process of swine manure composting and land application of compost	ATMOSPHERIC ENVIRONMENT
60	K. Reckmann, I. Traulsen and J. Krieter	2013	Life Cycle Assessment of pork production: A data inventory for the case of Germany	LIVESTOCK SCIENCE
61	A. Ogino, T. Osada, R. Takada, T. Takagi, S. Tsujimoto, T. Tonoue, et al.	2013	Life cycle assessment of Japanese pig farming using low-protein diet supplemented with amino acids	SOIL SCIENCE AND PLANT NUTRITION
62	J. W. De Vries, A. J. A. Aarnink, P. Koerkamp and I. J. M. De Boer	2013	Life Cycle Assessment of Segregating Fattening Pig Urine and Feces Compared to Conventional Liquid Manure Management	ENVIRONMENTAL SCIENCE & TECHNOLOGY
63	Q. Yang, X. F. Wu, H. P. Yang, S. H. Zhang and H. P. Chen	2012	Nonrenewable Energy Cost and Greenhouse Gas Emissions of a "Pig-Biogas-Fish" Systemin China	SCIENTIFIC WORLD JOURNAL
64	M. A. Dolman, H. C. J. Vrolijk and I. J. M. de Boer	2012	Exploring variation in economic, environmental and societal performance among Dutch fattening pig farms	LIVESTOCK SCIENCE
65	J. Bayo, M. D. Gomez-Lopez, A. Faz and A. Caballero	2012	Environmental assessment of pig slurry management after local characterization and normalization	JOURNAL OF CLEANER PRODUCTION
66	T. Nguyen, J. E. Hermansen and L. Mogensen	2011	Environmental assessment of Danish pork	Aarhus University's Report
67	E. Mosnier, H. M. G. van der Werf, J. Boissy and J. Y. Dourmad	2011	Evaluation of the environmental implications of the incorporation of feed-use amino acids in the manufacturing of pig and broiler feeds using Life Cycle Assessment	ANIMAL
68	J. J. Stone, C. R. Dollarhide, R. Jinka, R. C. Thaler, C. E. Hostetler and D. E. Clay	2010	Life Cycle Assessment of a Modern Northern Great Plains U.S. Swine Production Facility	ENVIRONMENTAL ENGINEERING SCIENCE
69	T. Prapaspongsa, P. Christensen, J. H. Schmidt and M. Thrane	2010	LCA of comprehensive pig manure management incorporating integrated technology systems	JOURNAL OF CLEANER PRODUCTION
70	N. Pelletier, P. Lammers, D. Stender and R. Pirog	2010	Life cycle assessment of high- and low-profitability commodity and deep-bedded niche swine production systems in the Upper Midwestern United States	AGRICULTURAL SYSTEMS
71	N. Halberg, J. E. Hermansen, I. S. Kristensen, J. Eriksen, N. Tvedegaard and B. M. Petersen	2010	Impact of organic pig production systems on CO2 emission, C sequestration and nitrate pollution	AGRONOMY FOR SUSTAINABLE DEVELOPMENT

## Sheet: Carbon accounting methods
Number	Region	Year of publication	Functional unit	Productivity(head)	System boundary	Manure management heatmap	Reference
1	China	2022	2.2 t manure and 5.2 t urine	>500	From manure to application	Tier 2 Mass Flow	A life cycle assessment of an enterprise's low-carbon emissions model: The Xinjiang Shihezi pig farm faecal treatment biogas project as a case study
2	Sweden	2021	1000 kg of meatand 1000 ha of farmland	n.a.	From cradle to consumption	Tier 2	A life cycle sustainability assessment of organic and conventional pork supply chains in Sweden
3	China	2021	1 ton carcass weight	Large-scale	From cradle to retail	Tier 2	Environmental impact and adaptation study of pig farming relocation in China
4	Ireland	2021	The manure produced from a pig farm of 728 sows	Intensive	From manure extraction to application	Tier 2 Mass Flow	Environmental sustainability assessment of pig manure mono- and co-digestion and dynamic land application of the digestate
5	Ecuador	2021	1 kg live weigh	>500	From cradle to farm gate	Tier 1	Life Cycle Assessment as a Methodological Framework for the Evaluation of the Environmental Sustainability of Pig and Pork Production in Ecuador
6	France	2021	1 tonne live weight	260 sows	From cradle to farm gate	Tier 2	Reducing environmental impacts of feed using multiobjective formulation: What benefits at the farm gate for pig and broiler production?
7	China	2021	1 kg live weigh	>500	From cradle to farm gate	Tier 2 Mass Flow	Mitigation of Multiple Environmental Footprints for China's Pig Production Using Different Land Use Strategies
8	China	2021	1000 kg carcass weight	Around 500	From cradle to slaughter gate	Tier 2 Mass Flow	Environmental burdens of small-scale intensive pig production in China
9	China	2021	1 head of pig	>150	From cradle to farm gate	Tier 3	Carbon emissions inventory of farm size pig husbandry combining Manure-DNDC model and IPCC coefficient methodology
10	Ireland	2021	16,000 t/yr manure and 10,000 t/yr food waste.	>500	From manure extraction to application	Tier 2 Mass Flow	Improved environmental sustainability and bioenergy recovery through pig manure and food waste on-farm co-digestion in Ireland
11	Brazil	2021	1 m3 of swine manure	n.a.	From manure extraction to application	Tier 2 Mass Flow	Effects of swine manure storage time on solid-liquid separation and biogas production: A life-cycle assessment approach
12	Mexico	2021	1 finished swine weighing 124 kg	Intensive	From cradle to farm gate		Environmental Impacts Associated with Intensive Production in Pig Farms in Mexico through Life Cycle Assessment
13	Brazil	2021	1 kg live weight	n.a.	From cradle to farm gate	Tier 2	The Reduction of Crude Protein with the Supplementation of Amino Acids in the Diet Reduces the Environmental Impact of Growing Pigs Production Evaluated through Life Cycle Assessment
14	Denmark	2021	1 kg live weight	>500	From cradle to farm gate	Tier 2 Mass Flow	Environmental impact of Danish pork at slaughterhouse gate – a life cycle assessment following biological and technological changes over a 10-year period
15	Italy	2021	1 kg of live weight (LW)	>500	From cradle to farm gate	Tier 1,2	Environmental impact of pig production affected by wet acid scrubber as mitigation technology
16	China	2021	1 kg live weight	>500	From cradle to farm gate	Tier 2	Investigating historical dynamics and mitigation scenarios of anthropogenic greenhouse gas emissions from pig production system in China
17	Europe	2020	1000 kg live weight	Intensive	From cradle to farm gate	Tier 2	Environmental life cycle comparisons of pig farming integrated with anaerobic digestion and algae-based wastewater treatment
18	USA	2020	1 kg live weight	Large-scale	From cradle to farm gate		Reducing life cycle fossil energy and greenhouse gas emissions for Midwest swine production systems
19	Mexico	2020	1 ton of manure	-	From manure excreted to application	Tier 2 Mass Flow	Environmental assessment of energy production from anaerobic digestion of pig manure at medium-scale using life cycle assessment
20	Denmark	2020	1 kg live weight	>500	From cradle to farm gate	Tier 2 Mass Flow	Environmental impacts of housing conditions and manure management in European pig production systems through a life cycle perspective: A case study in Denmark
21	Austria	2020	1 kg live weight	Intensive	From cradle to farm gate	Tier 1	The Effect of Climate Change-Induced Temperature Increase on Performance and Environmental Impact of Intensive Pig Production Systems
22	Spain	2020	1 kg live weight	Intensive	From cradle to farm gate	Tier 2	Life Cycle Assessment of Iberian Traditional Pig Production System in Spain
23	China	2020	1 tonne manure	-	From manure extraction to application	Tier 2	Life cycle assessment of anaerobic digestion of pig manure coupled with different digestate treatment technologies
24	Denmark	2020	1 kg pork	Large-scale	From cradle to the retailer		Life cycle assessment of Danish pork exports using different cooling technologies and comparison of upstream supply chain efficiencies between Denmark, China and Australia
	China	2020	1 kg pork	Large-scale	From cradle to the retailer
	Australia	2020	1 kg pork	Large-scale	From cradle to the retailer
25	USA	2020	1 kg live weight	n.a.	From cradle to farm gate	Tier 2 Mass Flow	Life-cycle analysis of soybean meal, distiller-dried grains with solubles, and synthetic amino acid-based animal feeds for swine and poultry production
26	Greece	2019	1 kg live weight	>500	From cradle to farm gate	Tier 2 Mass Flow	Effect of a dietary modification for fattening pigs on the environmental performance of commercial pig production in Greece
27	USA	2019	1000 kg manure slurry	-	From manure to application	Tier 2 Mass Flow	Consequential Life Cycle Assessment of Swine Manure Management within a Thermal Gasification Scenario
28	Cuba	2019	A porcine equivalent livestock unit (PELU) of 50 kg	-	From cradle to farm gate	Tier 2	Life Cycle Assessment for the Cuban pig production: Case study in Sancti Spiritus
29	Poland	2019	1 kg carcass weight	>500	From cradle to slaughter gate		Comparative analyses of pig farming management systems using the Life Cycle Assessment method
30	Argentina	2019	1 ton liveweight	Intensive	From cradle to farm gate	Tier 1	Energy and carbon footprints of chicken and pork from intensive production systems in Argentina
31	China	2018	1 kg live weight	>500	From cradle to farm gate	Tier 2	CARBON FOOTPRINT ASSESSMENT OF A LARGE-SCALE PIG PRODUCTION SYSTEM IN NORTHERN CHINA: A CASE STUDY
32	China	2018	1 ton slurry	-	From manure extraction to application	Tier 2 Mass Flow	Evaluating environmental impacts of pig slurry treatment technologies with a life-cycle perspective
33	China	2018	1 m3 swine wastewater	-	Four stages tidal flow constructed wetlands	Tier 2 Mass Flow	Assessment of a Field Tidal Flow Constructed Wetland in Treatment of Swine Wastewater: Life Cycle Approach
34	The Netherlands	2018	1 kg feed	-	From cradle to feed plant gate		Attributional versus consequential life cycle assessment and feed optimization: alternative protein sources in pig diets
35	Eight European countries	2018	1000 kg live weight	n.a.	From cradle to farm gate	Tier 2 Mass Flow	Effect of Three Husbandry Systems on Environmental Impact of Organic Pigs
36	Germany	2018	1m3 manure	-	From manure entering the subfloor storage to the crop production	Tier 2 Mass Flow	A life cycle assessment of liquid pig manure transport in line with EU regulations: A case study from Germany
37	China	2018	100 kg live weight	n.a.	From cradle to farm gate		Is it true that the longer the extended industrial chain, the better the circular agriculture? A case study of circular agriculture industry company in Fuqing, Fujian
38	Belgium	2018	1m3 manure	-	From manure extraction to application	Tier 2 Mass Flow	Life cycle assessment of biological pig manure treatment versus direct land application - a trade-off story
39	Brazil	2018	1 ton live weight	n.a.	From cradle to farm gate	Tier 1,2	Environmental impacts of precision feeding programs applied in pig production
40	Spain	2017	1 kg live weight	>500	From cradle to farm gate	Tier 1,2	Life Cycle Assessment of pig production: A case study in Galicia
41	Spain	2017	1 kg pork	n.a.	From cradle to pork cutting（pig slurry management was excluded）		Environmental assessment ofthe entire pork value chain in Catalonia – A strategy to work towards Circular Economy
42	Italy	2017	1 kg live weight	>500	From cradle to farm gate	Tier 2 Mass Flow	Environmental impact of the typical heavy pig production in Italy
43	Austria	2016	1 kg carcass weight	400-3000	From cradle to consumption	Tier 2	From farm to fork e A life cycle assessment of fresh Austrian pork
44	Canada	2016	1 kg carcass weight	>500	From cradle to farm gate	Tier 2 Mass Flow	Allocation factors and issues in agricultural carbon footprint: a case study of the Canadian pork industry
45	Germany	2016	1 kg carcass weight	n.a.	From cradle to slaughter gate		Comparative life cycle assessment (LCA) of pork using different protein sources in pig feed
46	Italy	2016	1 kg live weight	>500	From cradle to farm gate	Tier 1	Environmental impact of heavy pig production in a sample of Italian farms. A cradle to farm-gate analysis
47	Brazil	2016	1 kg live weight	Intensive	From cradle to farm gate	Tier 2 Mass Flow	Effect of feeding strategy on environmental impacts of pig fattening in different contexts of production: evaluation through life cycle assessment
	France	2016	1 kg live weight	Intensive	From cradle to farm gate
48	Canada	2016	1 kg carcass weight	>500	From cradle to farm gate	Tier 2 Mass Flow	Can the environmental impact of pig systems be reduced by utilising co-products as feed?
49	Europe	2016	1 ton live weight	Large-scale	From cradle to farm gate	Tier 2 Mass Flow	Environmental impact of using specialty feed ingredients in swine and poultry production: A life cycle assessment.
	North America	2016	1 ton live weight	Large-scale	From cradle to farm gate
	South America	2016	1 ton live weight	Large-scale	From cradle to farm gate
50	The Netherlands	2016	1 kg live weight	n.a.	From cradle to farm gate	Tier 2	Sensitivity analysis of greenhouse gas emissions from a pork production chain
51	Europe	2015	1 kg live weight	n.a.	From cradle to farm gate	Tier 1	Environmental impact of replacing soybean meal with rapeseed meal in diets of finishing pigs
52	Canada	2015	1 kg live weight	>500	From cradle to farm gate	Tier 2 Mass Flow	Accounting for uncertainty in the quantification of the environmental impacts of Canadian pig farming systems
53	Brazil	2015	30 kg live weight gain in the finishing stage	n.a.	From cradle to farm gate	Tier 2 Mass Flow	The finishing stage in swine production: influences of feed composition on carbon footprint
54	Brazil	2015	1000 kg carcass weight	Intensive	From cradle to slaughter gate	Tier 2 Mass Flow	Life cycle assessment of swine production in Brazil: a comparison of four manure management systems
55	Denmark	2014	1000 kg pig slurry	-	From manure extraction to application	Tier 2 Mass Flow	Life cycle assessment of pig slurry treatment technologies for nutrient redistribution in Denmark
56	China	2014	2993 livestock units (LU) (1 LU= 500 kg life weight)	Large-scale	From cradle to farm gate	Tier 2 Mass Flow	Life cycle assessment of manure management and nutrient recycling from a Chinese pig farm
57	Europe	2014	1 kg live weight	>500	From cradle to farm gate	Tier 2 Mass Flow	Evaluating environmental impacts of contrasting pig farming systems with life cycle assessment
58	France	2014	1 m3 slurry.	-	From manure extraction to application	Tier 2 Mass Flow	Environmental assessment of nutrient recycling from biological pig slurry treatment – Impact of fertilizer substitution and field emissions
59	China	2013	The composting and land application of 1 metric ton of raw manure on a dry solids basis.	-	From manure composting to application	Tier 3	Greenhouse gas emission from the total process of swine manure composting and land application of compost
60	Germany	2013	1 kg carcass weight	>500	From cradle to slaughter gate	Tier 2	Life Cycle Assessment of pork production: A data inventory for the case of Germany
61	Japan	2013	1 kg live weight	n.a.	From cradle to farm gate	Tier 2	Life cycle assessment of Japanese pig farming using low-protein diet supplemented with amino acids
62	The Netherlands	2013	1 ton mixed or segregated fattening pig urine and feces	-	From manure extraction to application	Tier 2 Mass Flow	Life Cycle Assessment of Segregating Fattening Pig Urine and Feces Compared to Conventional Liquid Manure Management
63	China	2012	8 pigs, with an average of 125 kg per head	Small-scale	“Pig-biogas-fish” system		Nonrenewable Energy Cost and Greenhouse Gas Emissions of a “Pig-Biogas-Fish” System in China
64	The Netherlands	2012	1 kg live weight	>500	From cradle to farm gate	Tier 2 Mass Flow	Exploring variation in economic, environmental and societal performance among Dutch fattening pig farms
65	Spain	2012	1m3 slurry	-	From manure extraction to application	Tier 2 Mass Flow	Environmental assessment of pig slurry management after local characterization and normalization
66	Denmark	2011	1 kg live weight	Highest technical efficiency	From cradle to farm gate	Tier 2 Mass Flow	Environmental assessment of Danish Pork
67	France	2011	1 kg of feed	-	From cradle to feed factory gate		Evaluation of the environmental implications of the incorporation of feed-use amino acids in the manufacturing of pig and broiler feeds using Life Cycle Assessment
68	USA	2010	1 head swine	>500	From feed manufacturing to farm gate		Life Cycle Assessment of a Modern Northern Great Plains U.S. Swine Production Facility
69	Europe	2010	1 ton manure	Intensive	From manure extraction to application	Tier 2 Mass Flow	LCA of comprehensive pig manure management incorporating integrated technology systems
70	USA	2010	1 kg live weight	>500	From cradle to farm gate	Tier 1,2	Life cycle assessment of high- and low-profitability commodity and deep-bedded niche swine production systems in the Upper Midwestern United States
71	Denmark	2010	1 kg live weight	Intensive	From cradle to farm gate	Tier 2	Impact of organic pig production systems on CO2 emission, C sequestration and nitrate pollution
Observation sum
Number of paper						60

## Sheet: Reference list of EF database
Number	Reference	Country	Year
1	Bai, Z. H.; Ma, L.; Qin, W.; Chen, Q.; Oenema, O.; Zhang, F. S., 2014. Changes in pig production in China and their effects on nitrogen and phosphorus use and losses. Environ. Sci. Technol. 21, 12742-12749.	China	2014
2	Chen, Z., Y. Wu, Q. Wen, H. Ni, and C. Chai. 2020. Effects of multiple antibiotics on greenhouse gas and ammonia emissions during swine manure composting. Environmental Science and Pollution Research 27(7):7289-7298.	China	2020
3	DB11/T1565-2018 Guidel ines of the greenhouse gas emissions accounting for anima husbandry enterprise	China	2018
4	Ding, G.; Han, S.H.; Yuan, Y.L.; Luo, L.; Wang, L.G.; Li, H.; Li, P. Emissions of NH3, N2O, and NO from Swine Manure Solid Storage in Winter. Environ. Sci. 2014, 35(7): 2807-2815 (in Chinese with English abstract)	China	2014
5	Dong, H.; Kang, G.; Zhu, Z.; Tao, X.; Chen, Y.; Xin, H.; Harmon J. D. Ammonia, methane, and carbon dioxide concentrations and emissions of a hoop grower-finisher swine barn. T. ASABE. 2009, 52(5):1741-1747.	China	2009
6	Dong, H.; Zhu, Z.; Shang, B.; Kang, G.; Zhu, H.; Xin, H. Greenhouse gas emissions from swine barns of various production stages in suburban Beijing, China. Atmos. Environ. 2007, 41(11):2391-2399.	China	2014
7	Yan Liu, Ruonan Ma, Danyang Li, Chuanren Qi, Lina Han, Mei Chen, Feng Fu, Jing Yuan, Guoxue Li,Effects of calcium magnesium phosphate fertilizer, biochar and spent mushroom substrate on compost maturity and gaseous emissions during pig manure composting,Journal of Environmental Management,Volume 267,2020.	China	2020
8	Feng, L. Emission of greenhouse gases and ammonia from swine manure storage. Master thesis. Huazhong Agricultural University, Wuhan, China, 2014 (in chinese with english abstract).	China	2014
9	Hou Y, Velthof GL, Oenema O. Mitigation of ammonia, nitrous oxide and methane emissions from manure management chains: a meta-analysis and integrated assessment. Glob Chang Biol. 2015 Mar;21(3):1293-312. doi: 10.1111/gcb.12767. Epub 2014 Dec 3. PMID: 25330119.	China	2014
10	Jiang, T.; Li, G.; Tang, Q.; Ma, X.; Wang, G.; Schuchardt, F. Effects of aeration method and aeration rate on greenhouse gas emissions during composting of pig feces in pilot scale. J. Environ. Qual. 2015,31:124-132.	China	2015
11	Jiang, T.; Schuchardt, F.; Li, G. Effect of turning and covering on greenhouse gas and ammonia emissions during the winter composting. T. CSAE. 2011, 27(10): 212-217. (in Chinese with English abstract)	China	2011
12	Jiang, T.; Schuchardt, F.; Li, G.; Guo, R.; Zhao, Y. Effect of C/N ratio, aeration rate and moisture content on ammonia and greenhouse gas emission during the composting. J. Environ. Qual. 2011, 23(10):1754-1760.	China	2011
13	Jiang, T.; Schuchardt, F.; Li, G.X.; Guo, R.; Luo, Y.M. Gaseous emission during the composting of pig feces from Chinese Ganqinfen system. Chemosphere 2013, 90(4):1545-1551.	China	2013
14	Jiaxi Zheng, Jibao Liu, Shenghui Han, Yawei Wang, Yuansong Wei, N2O emission factors of full-scale animal manure windrow composting in cold and warm seasons, Bioresource Technology, Volume 316, 2020, 123905,	China	2020
15	L. Ma, W.Q. Ma, G.L. Velthof, et al. Modelling nutrient flows in the food chain of China J. Environ. Qual., 39 (2010), pp. 1279-1289	China	2010
16	Liu Dong, Wang Fanghao, Ma Lin, et al. Estimation of NH3 emission factor for pig manure in China[J] . Transactions of the CSAE, 2008,24(4)：218－224.(in Chinese with English abstract)	China	2008
17	Luo, Y.; Li, G.X.; Wang, K.; Jiang, T.; Luo, W.H. Efects of additive superphosphate on NH3, N2O and CH4 emissions during pig manure composting. T. CSAE. 2012, 28(22): 235-242.(in Chinese with English abstract)	China	2014
18	Ren, X., Q. Wang, R. Li, C. C. Chang, J. Pan, and Z. Zhang. 2020. Effect of clay on greenhouse gas emissions and humification during pig manure composting as supported by spectroscopic evidence. Science of The Total Environment 737:139712.	China	2020
19	Sha Wei, David R. Chadwick, Barbara Amon, Hongmin Dong,Comparison of nitrogen losses from different manure treatment and application management systems in China,Journal of Environmental Management,Volume 306,2022,114430,	China	2022
20	Sun, X., P. Lu, T. Jiang, F. Schuchardt, G.X. Li. 2014. "Influence of bulking agents on CH4, N2O, and NH3 emissions during rapid composting of pig manure from the Chinese Ganqinfen system. Zhejiang Univ-Sci B (Biomed & Biotechnol). 15(4): 353-364	China	2014
21	Wang Y., Dong H., Zhu Z., Li T., Mei K., Xin H.2014Ammonia and greenhouse gas emissions from biogas digester effluent stored at different depthsJournal ArticleTransactions of the ASABE5751483-1491.	China	2014
22	Wang, Q., M. K. Awasthi, X. Ren, J. Zhao, R. Li, Z. Wang, M. Wang, H. Chen, and Z. Zhang. 2018. Combining biochar, zeolite and wood vinegar for composting of pig manure: The effect on greenhouse gas emission and nitrogen conservation. Waste Manag. 74:221-230	China	2018
23	Wei, S.; Bai, Z. H.; Qin, W.; Xia, L. J.; Oenema, O.; Jiang, R. F.; Ma, L., Environmental, economic and social analysis of peri-urban pig production. Journal of Cleaner Production 2016, 129, 596-607.	China	2016
24	Xiaowan Wang, Xiaobin Dong, Xue-Chao Wang, Peng Zhang, Ranran Liu, Jiří Jaromír Klemeš, Jianghua Zheng,A life cycle assessment of an enterprise's low-carbon emissions model: The Xinjiang Shihezi pig farm faecal treatment biogas project as a case study,Journal of Environmental Management,Volume 304,2022,114251	China	2022
25	Xin Liu, Zican Cai, Zengwei Yuan, Environmental burdens of small-scale intensive pig production in China, Science of The Total Environment, Volume 770, 2021, 144720,	China	2021
26	Yang, Y., M. Kumar Awasthi, W. Du, X. Ren, T. Lei, and J. Lv. 2020. Compost supplementation with nitrogen loss and greenhouse gas emissions during pig manure composting. Bioresource Technology 297:122435	China	2020
27	Yuan, Y.; Wang, L.G.; Li, H.; Ding, G.Q.; Han, S.H.; Wei, J.H. Nitrogenous gas emissions from solid swine manure under natural composting conditions. J. Agro-environment Sci. 2014, 33(7):1422-1428. (in Chinese with English abstract)	China	2014
28	Zengwei Yuan, Xiao Pan, Tianming Chen, Xuewei Liu, You Zhang, Songyan Jiang, Hu Sheng, Ling Zhang, Evaluating environmental impacts of pig slurry treatment technologies with a life-cycle perspective, Journal of Cleaner Production, Volume 188, 2018, Pages 840-850,	China	2018
29	Quan Wang, Mukesh Kumar Awasthi, Xiuna Ren, Junchao Zhao, Ronghua Li, Zhen Wang, Hongyu Chen, Meijing Wang, Zengqiang Zhang,Comparison of biochar, zeolite and their mixture amendment for aiding organic matter transformation and nitrogen conservation during pig manure composting,Bioresource Technology,Volume 245, Part A,2017,Pages 300-308,ISSN 0960-8524,	China	2018
30	Zhang, D., W. Luo, J. Yuan, G. Li, and Y. Luo. 2017. Effects of woody peat and superphosphate on compost maturity and gaseous emissions during pig manure compostin. Waste Manag. 68:56-63	China	2017
31	Zheng, J.; Wei, Y.S.; Wu, X.F.; Zeng, X.L.; Han, S.H.; Fang, Y. Nutrients conservation of N & P and greenhouse gas reduction of N2O emission during swine manure composting. Environ. Sci. 2011, 32(7): 2047-2055 (in Chinese with English abstract)	China	2011

## Sheet: Chinese EF Database
Part1：Emission factors of Country Inventoy and IPCC
1,Basic information											2,Emission data			3,Technology details							4,Physicochemical property
ID	Reference	Country	Year	Methodology（Source of Data）	Note	Stage	Gas	Details	Growth stage	Manure type	Original units	Value	% TN	Floor type	Removal type	Cover type	Compost material type	Compost system type	Turning type	Ventilation type	Classification (1 for manure, 2 for mixture)	Moisture (%)	pH	Ec (ms/cm)	TOM(%)	TOC(%)	TKN(%)	TAN(%)	TN(%)	C/N	TN loss/Initial N %
2	DB11/T1565-2018 Guidel ines of the greenhouse gas emissions accounting for anima husbandry enterprise	China	2018	Country Inventory		Housing	N2O	deep bedding			N2O-N kg/kg N	0.002	0.2
2	DB11/T1565-2018 Guidel ines of the greenhouse gas emissions accounting for anima husbandry enterprise	China	2018	Country Inventory		Housing	N2O	Dry lot			N2O-N kg/kg N	0.02	2
2	DB11/T1565-2018 Guidel ines of the greenhouse gas emissions accounting for anima husbandry enterprise	China	2018	Country Inventory		Storage	N2O	Solid-storage			N2O-N kg/kg N	0.02	2
2	DB11/T1565-2018 Guidel ines of the greenhouse gas emissions accounting for anima husbandry enterprise	China	2018	Country Inventory		Storage	N2O	Liquid			N2O-N kg/kg N	0.005	0.5
2	DB11/T1565-2018 Guidel ines of the greenhouse gas emissions accounting for anima husbandry enterprise	China	2018	Country Inventory		Treatment	N2O	Compost			N2O-N kg/kg N	0.01	1
2	DB11/T1565-2018 Guidel ines of the greenhouse gas emissions accounting for anima husbandry enterprise	China	2018	Country Inventory		Treatment	N2O	Anaerobic digester			N2O-N kg/kg N	0	0
2	DB11/T1565-2018 Guidel ines of the greenhouse gas emissions accounting for anima husbandry enterprise	China	2018	Country Inventory		Treatment	N2O	Anaerobic lagoon			N2O-N kg/kg N	0	0
2	DB11/T1565-2018 Guidel ines of the greenhouse gas emissions accounting for anima husbandry enterprise	China	2018	Country Inventory		Application	N2O	Daily spread			N2O-N kg/kg N	0	0
7	IPCC2006		2006	IPCC, 2006		Housing	N2O	Dry lot			kg N2O-N / kg N excreted	0.02	2
7	IPCC2006		2006	IPCC, 2006		Housing	N2O	Pitstorage below animal confinements			kg N2O-N / kg N excreted	0.002	0.2
7	IPCC2006		2006	IPCC, 2006		Housing	N2O	deep bedding-No mixing			kg N2O-N / kg N excreted	0.01	1
7	IPCC2006		2006	IPCC, 2006		Housing	N2O	deep bedding-Active mixing			kg N2O-N / kg N excreted	0.07	7
7	IPCC2006		2006	IPCC, 2006		Storage	N2O	Solid-storage			kg N2O-N / kg N excreted	0.005	0.5
7	IPCC2006		2006	IPCC, 2006		Storage	N2O	Liquid/Slurry-natural crustcover			kg N2O-N / kg N excreted	0.005	0.5
7	IPCC2006		2006	IPCC, 2006		Storage	N2O	Liquid/Slurry-without natural crustcover			kg N2O-N / kg N excreted	0	0
7	IPCC2006		2006	IPCC, 2006		Storage	N2O	Uncovered anaerobic lagoon			kg N2O-N / kg N excreted	0	0
7	IPCC2006		2006	IPCC, 2006		Treatment	N2O	Anaerobic digester			kg N2O-N / kg N excreted	0	0
7	IPCC2006		2006	IPCC, 2006		Treatment	N2O	Aerobic treatment-Natural aeration systems			kg N2O-N / kg N excreted	0.01	1
7	IPCC2006		2006	IPCC, 2006		Treatment	N2O	Aerobic treatment-Forced aeration systems			kg N2O-N / kg N excreted	0.005	0.5
7	IPCC2006		2006	IPCC, 2006		Treatment	N2O	Composting-In-Vesselc			kg N2O-N / kg N excreted	0.006	0.6
7	IPCC2006		2006	IPCC, 2006		Treatment	N2O	Composting- StaticPilec			kg N2O-N / kg N excreted	0.006	0.6
7	IPCC2006		2006	IPCC, 2006		Treatment	N2O	Composting- Intensive Windrowc			kg N2O-N / kg N excreted	0.1	10
7	IPCC2006		2006	IPCC, 2006		Treatment	N2O	Composting- Passive Windrowc			kg N2O-N / kg N excreted	0.01	1
7	IPCC2006		2006	IPCC, 2006		Treatment	N2O	Poultry manure with litter			kg N2O-N / kg N excreted	0.001	0.1
7	IPCC2006		2006	IPCC, 2006		Treatment	N2O	Poultry manure without litter			kg N2O-N / kg N excreted	0.001	0.1
7	IPCC2006		2006	IPCC, 2006		Application	N2O	Daily spread			kg N2O-N / kg N excreted	0	0
8	IPCC2019		2019	IPCC, 2019		Housing	N2O	Dry lot			kg N2O-N / kg N excreted	0.02	2
8	IPCC2019		2019	IPCC, 2019		Housing	N2O	Liquid/Slurry-natural crustcover			kg N2O-N / kg N excreted	0.005	0.5
8	IPCC2019		2019	IPCC, 2019		Housing	N2O	Pitstorage below animal confinements			kg N2O-N / kg N excreted	0.002	0.2
8	IPCC2019		2019	IPCC, 2019		Housing	N2O	deep bedding-No mixing			kg N2O-N / kg N excreted	0.01	1
8	IPCC2019		2019	IPCC, 2019		Housing	N2O	deep bedding-Active mixing			kg N2O-N / kg N excreted	0.07	7
8	IPCC2019		2019	IPCC, 2019		Storage	N2O	Solid-storage			kg N2O-N / kg N excreted	0.01	1
8	IPCC2019		2019	IPCC, 2019		Storage	N2O	Solid storage Covered/compacted			kg N2O-N / kg N excreted	0.01	1
8	IPCC2019		2019	IPCC, 2019		Storage	N2O	Solid storage ​- Bulking agent addition			kg N2O-N / kg N excreted	0.005	0.5
8	IPCC2019		2019	IPCC, 2019		Storage	N2O	Solid storage – Additives			kg N2O-N / kg N excreted	0.005	0.5
8	IPCC2019		2019	IPCC, 2019		Storage	N2O	Liquid/Slurry-without natural crustcover			kg N2O-N / kg N excreted	0	0
8	IPCC2019		2019	IPCC, 2019		Storage	N2O	Liquid/Slurry-cover			kg N2O-N / kg N excreted	0.005	0.5
8	IPCC2019		2019	IPCC, 2019		Storage	N2O	Uncovered anaerobic lagoon			kg N2O-N / kg N excreted	0	0
8	IPCC2019		2019	IPCC, 2019		Treatment	N2O	Anaerobic digester			kg N2O-N / kg N excreted	0.006	0.6
8	IPCC2019		2019	IPCC, 2019		Treatment	N2O	Composting-In-Vesselc			kg N2O-N / kg N excreted	0.006	0.6
8	IPCC2019		2019	IPCC, 2019		Treatment	N2O	Composting- StaticPilec			kg N2O-N / kg N excreted	0.01	1
8	IPCC2019		2019	IPCC, 2019		Treatment	N2O	Composting- Intensive Windrowc			kg N2O-N / kg N excreted	0.005	0.5
8	IPCC2019		2019	IPCC, 2019		Treatment	N2O	Composting- Passive Windrowc			kg N2O-N / kg N excreted	0.005	0.5
8	IPCC2019		2019	IPCC, 2019		Treatment	N2O	Poultry manure with litter			kg N2O-N / kg N excreted	0.001	0.1
8	IPCC2019		2019	IPCC, 2019		Treatment	N2O	Poultry manure without litter			kg N2O-N / kg N excreted	0.001	0.1
8	IPCC2019		2019	IPCC, 2019		Treatment	N2O	Aerobic treatment-Natural aeration systems			kg N2O-N / kg N excreted	0.01	1
8	IPCC2019		2019	IPCC, 2019		Treatment	N2O	Aerobic treatment-Forced aeration systems			kg N2O-N / kg N excreted	0.005	0.5
8	IPCC2019		2019	IPCC, 2019		Application	N2O	Daily spread			kg N2O-N / kg N excreted	0	0
24	Provincial MRV Guidance Based on IPCC Tier 2 Method	China	2020	Country Inventory		Housing	N2O	Dry lot			kg N2O-N / kg N excreted	0.02	2
24	Provincial MRV Guidance Based on IPCC Tier 2 Method	China	2020	Country Inventory		Housing	N2O	deep-bedding No mixing			kg N2O-N / kg N excreted	0.01	1
24	Provincial MRV Guidance Based on IPCC Tier 2 Method	China	2020	Country Inventory		Housing	N2O	deep bedding-Active mixing			kg N2O-N / kg N excreted	0.07	7
24	Provincial MRV Guidance Based on IPCC Tier 2 Method	China	2020	Country Inventory		Housing	N2O	Pitstorage below animal confinements粪肥深坑储存..动物围栏下方的坑库。。粪便的收集和储存通常只有少量或少量的加水，通常在封闭的动物封闭设施的地板下面。			kg N2O-N / kg N excreted	0.002	0.2
24	Provincial MRV Guidance Based on IPCC Tier 2 Method	China	2020	Country Inventory		Storage	N2O	Solid-storage			kg N2O-N / kg N excreted	0.005	0.5
24	Provincial MRV Guidance Based on IPCC Tier 2 Method	China	2020	Country Inventory		Storage	N2O	Liquid/Slurry-natural crustcover			kg N2O-N / kg N excreted	0.005	0.5
24	Provincial MRV Guidance Based on IPCC Tier 2 Method	China	2020	Country Inventory		Storage	N2O	Liquid/Slurry-without natural crustcover			kg N2O-N / kg N excreted	0	0
24	Provincial MRV Guidance Based on IPCC Tier 2 Method	China	2020	Country Inventory		Storage	N2O	Uncovered anaerobic lagoon			kg N2O-N / kg N excreted	0	0
24	Provincial MRV Guidance Based on IPCC Tier 2 Method	China	2020	Country Inventory		Treatment	N2O	Composting-StaticPilec			kg N2O-N / kg N excreted	0.006	0.6
24	Provincial MRV Guidance Based on IPCC Tier 2 Method	China	2020	Country Inventory		Treatment	N2O	Composting-Intensive Windrow			kg N2O-N / kg N excreted	0.1	10
24	Provincial MRV Guidance Based on IPCC Tier 2 Method	China	2020	Country Inventory		Treatment	N2O	Composting-Passive Windrowc			kg N2O-N / kg N excreted	0.01	1
24	Provincial MRV Guidance Based on IPCC Tier 2 Method	China	2020	Country Inventory		Treatment	N2O	Anaerobic digester			kg N2O-N / kg N excreted	0	0
24	Provincial MRV Guidance Based on IPCC Tier 2 Method	China	2020	Country Inventory		Treatment	N2O	Aerobic treatment-Natural aeration systems			kg N2O-N / kg N excreted	0.01	1
24	Provincial MRV Guidance Based on IPCC Tier 2 Method	China	2020	Country Inventory		Treatment	N2O	Aerobic treatment-Forced aeration systems			kg N2O-N / kg N excreted	0.005	0.5
24	Provincial MRV Guidance Based on IPCC Tier 2 Method	China	2020	Country Inventory		Application	N2O	Burned for fuel or as waste			kg N2O-N / kg N excreted	0.007	0.7
16	Guideline for the Preparation of Atmospheric Ammonia Source Emission Inventories. Retrieved from Ministry of Ecology and Environment of the People's Republic of China (MEE,2012)	China	2012	Country Inventory	Intensive farming	Storage	NH3		sow	liquid	NH3-N of % TAN	3.8
16	Guideline for the Preparation of Atmospheric Ammonia Source Emission Inventories. Retrieved from Ministry of Ecology and Environment of the People's Republic of China (MEE,2012)	China	2012	Country Inventory	Intensive farming	Storage	NH3		sow	solid	NH3-N of % TAN	4.6
16	Guideline for the Preparation of Atmospheric Ammonia Source Emission Inventories. Retrieved from Ministry of Ecology and Environment of the People's Republic of China (MEE,2012)	China	2012	Country Inventory	Free-range farming	Storage	NH3		sow	liquid	NH3-N of % TAN	14
16	Guideline for the Preparation of Atmospheric Ammonia Source Emission Inventories. Retrieved from Ministry of Ecology and Environment of the People's Republic of China (MEE,2012)	China	2012	Country Inventory	Free-range farming	Storage	NH3		sow	solid	NH3-N of % TAN	45
16	Guideline for the Preparation of Atmospheric Ammonia Source Emission Inventories. Retrieved from Ministry of Ecology and Environment of the People's Republic of China (MEE,2012)	China	2012	Country Inventory	Intensive farming	Storage	NH3		piglet（<75day）	liquid	NH3-N of % TAN	3.8
16	Guideline for the Preparation of Atmospheric Ammonia Source Emission Inventories. Retrieved from Ministry of Ecology and Environment of the People's Republic of China (MEE,2012)	China	2012	Country Inventory	Intensive farming	Storage	NH3		piglet（<75day）	solid	NH3-N of % TAN	4.6
16	Guideline for the Preparation of Atmospheric Ammonia Source Emission Inventories. Retrieved from Ministry of Ecology and Environment of the People's Republic of China (MEE,2012)	China	2012	Country Inventory	Free-range farming	Storage	NH3		piglet（<75day）	liquid	NH3-N of % TAN	14
16	Guideline for the Preparation of Atmospheric Ammonia Source Emission Inventories. Retrieved from Ministry of Ecology and Environment of the People's Republic of China (MEE,2012)	China	2012	Country Inventory	Free-range farming	Storage	NH3		piglet（<75day）	solid	NH3-N of % TAN	45
16	Guideline for the Preparation of Atmospheric Ammonia Source Emission Inventories. Retrieved from Ministry of Ecology and Environment of the People's Republic of China (MEE,2012)	China	2012	Country Inventory	Intensive farming	Storage	NH3		Growth-Finisher（>75day）	liquid	NH3-N of % TAN	3.8
16	Guideline for the Preparation of Atmospheric Ammonia Source Emission Inventories. Retrieved from Ministry of Ecology and Environment of the People's Republic of China (MEE,2012)	China	2012	Country Inventory	Intensive farming	Storage	NH3		Growth-Finisher（>75day）	solid	NH3-N of % TAN	4.6
16	Guideline for the Preparation of Atmospheric Ammonia Source Emission Inventories. Retrieved from Ministry of Ecology and Environment of the People's Republic of China (MEE,2012)	China	2012	Country Inventory	Free-range farming	Storage	NH3		Growth-Finisher（>75day）	liquid	NH3-N of % TAN	14
16	Guideline for the Preparation of Atmospheric Ammonia Source Emission Inventories. Retrieved from Ministry of Ecology and Environment of the People's Republic of China (MEE,2012)	China	2012	Country Inventory	Free-range farming	Storage	NH3		Growth-Finisher（>75day）	solid	NH3-N of % TAN	45
16	Guideline for the Preparation of Atmospheric Ammonia Source Emission Inventories. Retrieved from Ministry of Ecology and Environment of the People's Republic of China (MEE,2012)	China	2012	Country Inventory	Intensive farming	Storage	N2O		sow	liquid	N2O-N of % TAN	0
16	Guideline for the Preparation of Atmospheric Ammonia Source Emission Inventories. Retrieved from Ministry of Ecology and Environment of the People's Republic of China (MEE,2012)	China	2012	Country Inventory	Intensive farming	Storage	N2O		sow	solid	N2O-N of % TAN	5
16	Guideline for the Preparation of Atmospheric Ammonia Source Emission Inventories. Retrieved from Ministry of Ecology and Environment of the People's Republic of China (MEE,2012)	China	2012	Country Inventory	Free-range farming	Storage	N2O		sow	liquid	N2O-N of % TAN	0
16	Guideline for the Preparation of Atmospheric Ammonia Source Emission Inventories. Retrieved from Ministry of Ecology and Environment of the People's Republic of China (MEE,2012)	China	2012	Country Inventory	Free-range farming	Storage	N2O		sow	solid	N2O-N of % TAN	5
16	Guideline for the Preparation of Atmospheric Ammonia Source Emission Inventories. Retrieved from Ministry of Ecology and Environment of the People's Republic of China (MEE,2012)	China	2012	Country Inventory	Intensive farming	Storage	N2O		piglet（<75day）	liquid	N2O-N of % TAN	0
16	Guideline for the Preparation of Atmospheric Ammonia Source Emission Inventories. Retrieved from Ministry of Ecology and Environment of the People's Republic of China (MEE,2012)	China	2012	Country Inventory	Intensive farming	Storage	N2O		piglet（<75day）	solid	N2O-N of % TAN	5
16	Guideline for the Preparation of Atmospheric Ammonia Source Emission Inventories. Retrieved from Ministry of Ecology and Environment of the People's Republic of China (MEE,2012)	China	2012	Country Inventory	Free-range farming	Storage	N2O		piglet（<75day）	liquid	N2O-N of % TAN	0
16	Guideline for the Preparation of Atmospheric Ammonia Source Emission Inventories. Retrieved from Ministry of Ecology and Environment of the People's Republic of China (MEE,2012)	China	2012	Country Inventory	Free-range farming	Storage	N2O		piglet（<75day）	solid	N2O-N of % TAN	5
16	Guideline for the Preparation of Atmospheric Ammonia Source Emission Inventories. Retrieved from Ministry of Ecology and Environment of the People's Republic of China (MEE,2012)	China	2012	Country Inventory	Intensive farming	Storage	N2O		Growth-Finisher（>75day）	liquid	N2O-N of % TAN	0
16	Guideline for the Preparation of Atmospheric Ammonia Source Emission Inventories. Retrieved from Ministry of Ecology and Environment of the People's Republic of China (MEE,2012)	China	2012	Country Inventory	Intensive farming	Storage	N2O		Growth-Finisher（>75day）	solid	N2O-N of % TAN	5
16	Guideline for the Preparation of Atmospheric Ammonia Source Emission Inventories. Retrieved from Ministry of Ecology and Environment of the People's Republic of China (MEE,2012)	China	2012	Country Inventory	Free-range farming	Storage	N2O		Growth-Finisher（>75day）	liquid	N2O-N of % TAN	0
16	Guideline for the Preparation of Atmospheric Ammonia Source Emission Inventories. Retrieved from Ministry of Ecology and Environment of the People's Republic of China (MEE,2012)	China	2012	Country Inventory	Free-range farming	Storage	N2O		Growth-Finisher（>75day）	solid	NO-N of % TAN	5
16	Guideline for the Preparation of Atmospheric Ammonia Source Emission Inventories. Retrieved from Ministry of Ecology and Environment of the People's Republic of China (MEE,2012)	China	2012	Country Inventory	Intensive farming	Storage	NO		sow	liquid	NO-N of % TAN	0.01
16	Guideline for the Preparation of Atmospheric Ammonia Source Emission Inventories. Retrieved from Ministry of Ecology and Environment of the People's Republic of China (MEE,2012)	China	2012	Country Inventory	Intensive farming	Storage	NO		sow	solid	NO-N of % TAN	1
16	Guideline for the Preparation of Atmospheric Ammonia Source Emission Inventories. Retrieved from Ministry of Ecology and Environment of the People's Republic of China (MEE,2012)	China	2012	Country Inventory	Free-range farming	Storage	NO		sow	liquid	NO-N of % TAN	0.01
16	Guideline for the Preparation of Atmospheric Ammonia Source Emission Inventories. Retrieved from Ministry of Ecology and Environment of the People's Republic of China (MEE,2012)	China	2012	Country Inventory	Free-range farming	Storage	NO		sow	solid	NO-N of % TAN	1
16	Guideline for the Preparation of Atmospheric Ammonia Source Emission Inventories. Retrieved from Ministry of Ecology and Environment of the People's Republic of China (MEE,2012)	China	2012	Country Inventory	Intensive farming	Storage	NO		piglet（<75day）	liquid	NO-N of % TAN	0.01
16	Guideline for the Preparation of Atmospheric Ammonia Source Emission Inventories. Retrieved from Ministry of Ecology and Environment of the People's Republic of China (MEE,2012)	China	2012	Country Inventory	Intensive farming	Storage	NO		piglet（<75day）	solid	NO-N of % TAN	1
16	Guideline for the Preparation of Atmospheric Ammonia Source Emission Inventories. Retrieved from Ministry of Ecology and Environment of the People's Republic of China (MEE,2012)	China	2012	Country Inventory	Free-range farming	Storage	NO		piglet（<75day）	liquid	NO-N of % TAN	0.01
16	Guideline for the Preparation of Atmospheric Ammonia Source Emission Inventories. Retrieved from Ministry of Ecology and Environment of the People's Republic of China (MEE,2012)	China	2012	Country Inventory	Free-range farming	Storage	NO		piglet（<75day）	solid	NO-N of % TAN	1
16	Guideline for the Preparation of Atmospheric Ammonia Source Emission Inventories. Retrieved from Ministry of Ecology and Environment of the People's Republic of China (MEE,2012)	China	2012	Country Inventory	Intensive farming	Storage	NO		Growth-Finisher（>75day）	liquid	NO-N of % TAN	0.01
16	Guideline for the Preparation of Atmospheric Ammonia Source Emission Inventories. Retrieved from Ministry of Ecology and Environment of the People's Republic of China (MEE,2012)	China	2012	Country Inventory	Intensive farming	Storage	NO		Growth-Finisher（>75day）	solid	NO-N of % TAN	1
16	Guideline for the Preparation of Atmospheric Ammonia Source Emission Inventories. Retrieved from Ministry of Ecology and Environment of the People's Republic of China (MEE,2012)	China	2012	Country Inventory	Free-range farming	Storage	NO		Growth-Finisher（>75day）	liquid	NO-N of % TAN	0.01
16	Guideline for the Preparation of Atmospheric Ammonia Source Emission Inventories. Retrieved from Ministry of Ecology and Environment of the People's Republic of China (MEE,2012)	China	2012	Country Inventory	Free-range farming	Storage	NO		Growth-Finisher（>75day）	solid	NO-N of % TAN	1
16	Guideline for the Preparation of Atmospheric Ammonia Source Emission Inventories. Retrieved from Ministry of Ecology and Environment of the People's Republic of China (MEE,2012)	China	2012	Country Inventory	Intensive farming	Storage	N2		sow	liquid	N2-N of % TAN	0.3
16	Guideline for the Preparation of Atmospheric Ammonia Source Emission Inventories. Retrieved from Ministry of Ecology and Environment of the People's Republic of China (MEE,2012)	China	2012	Country Inventory	Intensive farming	Storage	N2		sow	solid	N2-N of % TAN	30
16	Guideline for the Preparation of Atmospheric Ammonia Source Emission Inventories. Retrieved from Ministry of Ecology and Environment of the People's Republic of China (MEE,2012)	China	2012	Country Inventory	Free-range farming	Storage	N2		sow	liquid	N2-N of % TAN	0.3
16	Guideline for the Preparation of Atmospheric Ammonia Source Emission Inventories. Retrieved from Ministry of Ecology and Environment of the People's Republic of China (MEE,2012)	China	2012	Country Inventory	Free-range farming	Storage	N2		sow	solid	N2-N of % TAN	30
16	Guideline for the Preparation of Atmospheric Ammonia Source Emission Inventories. Retrieved from Ministry of Ecology and Environment of the People's Republic of China (MEE,2012)	China	2012	Country Inventory	Intensive farming	Storage	N2		piglet（<75day）	liquid	N2-N of % TAN	0.3
16	Guideline for the Preparation of Atmospheric Ammonia Source Emission Inventories. Retrieved from Ministry of Ecology and Environment of the People's Republic of China (MEE,2012)	China	2012	Country Inventory	Intensive farming	Storage	N2		piglet（<75day）	solid	N2-N of % TAN	30
16	Guideline for the Preparation of Atmospheric Ammonia Source Emission Inventories. Retrieved from Ministry of Ecology and Environment of the People's Republic of China (MEE,2012)	China	2012	Country Inventory	Free-range farming	Storage	N2		piglet（<75day）	liquid	N2-N of % TAN	0.3
16	Guideline for the Preparation of Atmospheric Ammonia Source Emission Inventories. Retrieved from Ministry of Ecology and Environment of the People's Republic of China (MEE,2012)	China	2012	Country Inventory	Free-range farming	Storage	N2		piglet（<75day）	solid	N2-N of % TAN	30
16	Guideline for the Preparation of Atmospheric Ammonia Source Emission Inventories. Retrieved from Ministry of Ecology and Environment of the People's Republic of China (MEE,2012)	China	2012	Country Inventory	Intensive farming	Storage	N2		Growth-Finisher（>75day）	liquid	N2-N of % TAN	0.3
16	Guideline for the Preparation of Atmospheric Ammonia Source Emission Inventories. Retrieved from Ministry of Ecology and Environment of the People's Republic of China (MEE,2012)	China	2012	Country Inventory	Intensive farming	Storage	N2		Growth-Finisher（>75day）	solid	N2-N of % TAN	30
16	Guideline for the Preparation of Atmospheric Ammonia Source Emission Inventories. Retrieved from Ministry of Ecology and Environment of the People's Republic of China (MEE,2012)	China	2012	Country Inventory	Free-range farming	Storage	N2		Growth-Finisher（>75day）	liquid	N2-N of % TAN	0.3
16	Guideline for the Preparation of Atmospheric Ammonia Source Emission Inventories. Retrieved from Ministry of Ecology and Environment of the People's Republic of China (MEE,2012)	China	2012	Country Inventory	Free-range farming	Storage	N2		Growth-Finisher（>75day）	solid	N2-N of % TAN	30
Part2：Greenhouse gas emission factors from measurment and models
1,Basic information											2,Emission data			3,Technology details							4,Physicochemical property
ID	Reference	Country	Year	Methodology（Source of Data）	Note	Stage	Gas	Details	Growth stage	Manure type	Original units	Value	% TN	Floor type	Removal type	Cover type	Compost material type	Compost system type	Turning type	Ventilation type	Classification (1 for manure, 2 for mixture)	Moisture (%)	pH	Ec (ms/cm)	TOM(%)	TOC(%)	TKN(%)	TAN(%)	TN(%)	C/N	TN loss/Initial N %
33	Compost supplementation with nitrogen loss and greenhouse gas emissions during pig manure composting	China	2020	Measure	pig manure + wheat straw	Treatment	NH3	Compost			% Initial N	20.65	20.65				wheat straw(WS and PM) were mixed with 1:2 (w/w）	130-L reactors with 100-L net capacity				55.08	8.52	2.33	70.53	40.91	3.15			12.99	23.89
33	Compost supplementation with nitrogen loss and greenhouse gas emissions during pig manure composting	China	2020	Measure	pig manure + wheat straw + 15% bean dreg	Treatment	NH3	Compost-addition			% Initial N	28.11	28.11				wheat straw(WS and PM) were mixed with 1:2 (w/w）	130-L reactors with 100-L net capacity				55.08	8.52	2.33	70.53	40.91	3.15			12.99	30.01
33	Compost supplementation with nitrogen loss and greenhouse gas emissions during pig manure composting	China	2020	Measure	pig manure + wheat straw + 10% biochar	Treatment	NH3	Compost-addition			% Initial N	13.86	13.86				wheat straw(WS and PM) were mixed with 1:2 (w/w）	130-L reactors with 100-L net capacity				55.08	8.52	2.33	70.53	40.91	3.15			12.99	16.59
33	Compost supplementation with nitrogen loss and greenhouse gas emissions during pig manure composting	China	2020	Measure	pig manure + wheat straw + 15% bean dregs + 10% biochar	Treatment	NH3	Compost-addition			% Initial N	19.21	19.21				wheat straw(WS and PM) were mixed with 1:2 (w/w）	130-L reactors with 100-L net capacity				55.08	8.52	2.33	70.53	40.91	3.15			12.99	22.73
33	Compost supplementation with nitrogen loss and greenhouse gas emissions during pig manure composting	China	2020	Measure	pig manure + wheat straw	Treatment	N2O	Compost			% Initial N	0.72	0.72				wheat straw(WS and PM) were mixed with 1:2 (w/w）	130-L reactors with 100-L net capacity				55.08	8.52	2.33	70.53	40.91	3.15			12.99	23.89
33	Compost supplementation with nitrogen loss and greenhouse gas emissions during pig manure composting	China	2020	Measure	pig manure + wheat straw + 15% bean dreg	Treatment	N2O	Compost-addition			% Initial N	0.73	0.73				wheat straw(WS and PM) were mixed with 1:2 (w/w）	130-L reactors with 100-L net capacity				55.08	8.52	2.33	70.53	40.91	3.15			12.99	30.01
33	Compost supplementation with nitrogen loss and greenhouse gas emissions during pig manure composting	China	2020	Measure	pig manure + wheat straw + 10% biochar	Treatment	N2O	Compost-addition			% Initial N	0.45	0.45				wheat straw(WS and PM) were mixed with 1:2 (w/w）	130-L reactors with 100-L net capacity				55.08	8.52	2.33	70.53	40.91	3.15			12.99	16.59
33	Compost supplementation with nitrogen loss and greenhouse gas emissions during pig manure composting	China	2020	Measure	pig manure + wheat straw + 15% bean dregs + 10% biochar	Treatment	N2O	Compost-addition			% Initial N	0.55	0.55				wheat straw(WS and PM) were mixed with 1:2 (w/w）	130-L reactors with 100-L net capacity				55.08	8.52	2.33	70.53	40.91	3.15			12.99	22.73
29	Effects of woody peat and superphosphate on compost maturity and gaseous emissions during pig manure composting	China	2017	Measure	control treatment	Treatment	NH3	Compost			% TN	13.18	13.18					60L heat insulated composting	28 days with turning over the composting mate_x005f_x0002_rials manually on day 3, 7, 14 and 21.		1	69.74	8.24	2.31					2.68	11.56	20.29
29	Effects of woody peat and superphosphate on compost maturity and gaseous emissions during pig manure composting	China	2017	Measure	superphosphate amended treatment	Treatment	NH3	Compost-addition			% TN	11.36	11.36					60L heat insulated composting	28 days with turning over the composting mate_x005f_x0002_rials manually on day 3, 7, 14 and 21.		1	69.74	8.24	2.31					2.68	11.56	13.03
29	Effects of woody peat and superphosphate on compost maturity and gaseous emissions during pig manure composting	China	2017	Measure	control treatment	Treatment	N2O	Compost			% TN	0.0025	0.0025					60L heat insulated composting	28 days with turning over the composting mate_x005f_x0002_rials manually on day 3, 7, 14 and 21.		1	69.74	8.24	2.31					2.68	11.56	20.29
29	Effects of woody peat and superphosphate on compost maturity and gaseous emissions during pig manure composting	China	2017	Measure	superphosphate amended treatment	Treatment	N2O	Compost-addition			% TN	0.0149	0.0149					60L heat insulated composting	28 days with turning over the composting mate_x005f_x0002_rials manually on day 3, 7, 14 and 21.		1	69.74	8.24	2.31					2.68	11.56	13.03
28	Combining biochar, zeolite and wood vinegar for composting of pig manure: The effect on greenhouse gas emission and nitrogen conservation.	China	2018	Measure	Control	Treatment	N2O	Compost			% N2O-N of initial N	0.735	0.735				Wheat straw	130L PVC reactors			1	63.12	8	5.41	73.04		26.11g/kg raw material
28	Combining biochar, zeolite and wood vinegar for composting of pig manure: The effect on greenhouse gas emission and nitrogen conservation.	China	2018	Measure	10%biochar	Treatment	N2O	Compost-addition			% N2O-N of initial N	0.2905	0.2905				Wheat straw	130L PVC reactors			1	63.12	8	5.41	73.04		26.11g/kg raw material
28	Combining biochar, zeolite and wood vinegar for composting of pig manure: The effect on greenhouse gas emission and nitrogen conservation.	China	2018	Measure	10%biochar+10%zeolite	Treatment	N2O	Compost-addition			% N2O-N of initial N	0.1995	0.1995				Wheat straw	130L PVC reactors			1	63.12	8	5.41	73.04		26.11g/kg raw material
28	Combining biochar, zeolite and wood vinegar for composting of pig manure: The effect on greenhouse gas emission and nitrogen conservation.	China	2018	Measure	10%biochar+10%zeolite+0.5%wood vinegar)	Treatment	N2O	Compost-addition			% N2O-N of initial N	0.175	0.175				Wheat straw	130L PVC reactors			1	63.12	8	5.41	73.04		26.11g/kg raw material
28	Combining biochar, zeolite and wood vinegar for composting of pig manure: The effect on greenhouse gas emission and nitrogen conservation.	China	2018	Measure	10%biochar+10%zeolite+1.0%wood vinegar)	Treatment	N2O	Compost-addition			% N2O-N of initial N	0.175	0.175				Wheat straw	130L PVC reactors			1	63.12	8	5.41	73.04		26.11g/kg raw material
28	Combining biochar, zeolite and wood vinegar for composting of pig manure: The effect on greenhouse gas emission and nitrogen conservation.	China	2018	Measure	10%biochar+10%zeolite+2.0%wood vinegar)	Treatment	N2O	Compost-addition			% N2O-N of initial N	0.1645	0.1645				Wheat straw	130L PVC reactors			1	63.12	8	5.41	73.04		26.11g/kg raw material
28	Combining biochar, zeolite and wood vinegar for composting of pig manure: The effect on greenhouse gas emission and nitrogen conservation.	China	2018	Measure	Control	Treatment	NH3	Compost			% NH3-N of initial N	2.3345	2.3345				Wheat straw	130L PVC reactors			1	63.12	8	5.41	73.04		26.11g/kg raw material
28	Combining biochar, zeolite and wood vinegar for composting of pig manure: The effect on greenhouse gas emission and nitrogen conservation.	China	2018	Measure	10%biochar	Treatment	NH3	Compost-addition			% NH3-N of initial N	1.4455	1.4455				Wheat straw	130L PVC reactors			1	63.12	8	5.41	73.04		26.11g/kg raw material
28	Combining biochar, zeolite and wood vinegar for composting of pig manure: The effect on greenhouse gas emission and nitrogen conservation.	China	2018	Measure	10%biochar+10%zeolite	Treatment	NH3	Compost-addition			% NH3-N of initial N	0.7805	0.7805				Wheat straw	130L PVC reactors			1	63.12	8	5.41	73.04		26.11g/kg raw material
28	Combining biochar, zeolite and wood vinegar for composting of pig manure: The effect on greenhouse gas emission and nitrogen conservation.	China	2018	Measure	10%biochar+10%zeolite+0.5%wood vinegar)	Treatment	NH3	Compost-addition			% NH3-N of initial N	0.6055	0.6055				Wheat straw	130L PVC reactors			1	63.12	8	5.41	73.04		26.11g/kg raw material
28	Combining biochar, zeolite and wood vinegar for composting of pig manure: The effect on greenhouse gas emission and nitrogen conservation.	China	2018	Measure	10%biochar+10%zeolite+1.0%wood vinegar)	Treatment	NH3	Compost-addition			% NH3-N of initial N	0.6195	0.6195				Wheat straw	130L PVC reactors			1	63.12	8	5.41	73.04		26.11g/kg raw material
28	Combining biochar, zeolite and wood vinegar for composting of pig manure: The effect on greenhouse gas emission and nitrogen conservation.	China	2018	Measure	10%biochar+10%zeolite+2.0%wood vinegar)	Treatment	NH3	Compost-addition			% NH3-N of initial N	0.5355	0.5355				Wheat straw	130L PVC reactors			1	63.12	8	5.41	73.04		26.11g/kg raw material
27	Effects of calcium magnesium phosphate fertilizer, biochar and spent mushroom substrate on compost maturity and gaseous emissions during pig manure composting	China	2020	Measure	CK: pig manure + cornstalks (Control)	Treatment	NH3	Compost			NH3-N/% initial TN	30.86	30.86				pig manure and cornstalks were mixed using a ratio of 85:15 (wet weight)	60L laboratory-scale reactor		0.4 L /min	1	73.96	7.03			34.08			2.59	13.16	40.37
27	Effects of calcium magnesium phosphate fertilizer, biochar and spent mushroom substrate on compost maturity and gaseous emissions during pig manure composting	China	2020	Measure	CaMgP: pig manure + cornstalks+calcium magnesium phosphate fertilizer	Treatment	NH3	Compost-addition			NH3-N/% initial TN	19.38	19.38				pig manure and cornstalks were mixed using a ratio of 85:15 (wet weight)	60L laboratory-scale reactor		0.4 L /min	1	73.96	7.03			34.08			2.59	13.16	24.35
27	Effects of calcium magnesium phosphate fertilizer, biochar and spent mushroom substrate on compost maturity and gaseous emissions during pig manure composting	China	2020	Measure	Biochar. pig manure + cornstalks +biochar	Treatment	NH3	Compost-addition			NH3-N/% initial TN	24.11	24.11				pig manure and cornstalks were mixed using a ratio of 85:15 (wet weight)	60L laboratory-scale reactor		0.4 L /min	1	73.96	7.03			34.08			2.59	13.16	34.91
27	Effects of calcium magnesium phosphate fertilizer, biochar and spent mushroom substrate on compost maturity and gaseous emissions during pig manure composting	China	2020	Measure	SMS: Pig manure+cornstalks +spent mushroom substrate.	Treatment	NH3	Compost-addition			NH3-N/% initial TN	25.49	25.49				pig manure and cornstalks were mixed using a ratio of 85:15 (wet weight)	60L laboratory-scale reactor		0.4 L /min	1	73.96	7.03			34.08			2.59	13.16	39.74
27	Effects of calcium magnesium phosphate fertilizer, biochar and spent mushroom substrate on compost maturity and gaseous emissions during pig manure composting	China	2020	Measure	CK: pig manure + cornstalks (Control)	Treatment	N2O	Compost			N2O-N/% initial TN	0.04	0.04				pig manure and cornstalks were mixed using a ratio of 85:15 (wet weight)	60L laboratory-scale reactor		0.4 L /min	1	73.96	7.03			34.08			2.59	13.16	40.37
27	Effects of calcium magnesium phosphate fertilizer, biochar and spent mushroom substrate on compost maturity and gaseous emissions during pig manure composting	China	2020	Measure	CaMgP: pig manure + cornstalks+calcium magnesium phosphate fertilizer	Treatment	N2O	Compost-addition			N2O-N/% initial TN	0.07	0.07				pig manure and cornstalks were mixed using a ratio of 85:15 (wet weight)	60L laboratory-scale reactor		0.4 L /min	1	73.96	7.03			34.08			2.59	13.16	24.35
27	Effects of calcium magnesium phosphate fertilizer, biochar and spent mushroom substrate on compost maturity and gaseous emissions during pig manure composting	China	2020	Measure	Biochar. pig manure + cornstalks +biochar	Treatment	N2O	Compost-addition			N2O-N/% initial TN	0.05	0.05				pig manure and cornstalks were mixed using a ratio of 85:15 (wet weight)	60L laboratory-scale reactor		0.4 L /min	1	73.96	7.03			34.08			2.59	13.16	34.91
27	Effects of calcium magnesium phosphate fertilizer, biochar and spent mushroom substrate on compost maturity and gaseous emissions during pig manure composting	China	2020	Measure	SMS: Pig manure+cornstalks +spent mushroom substrate.	Treatment	N2O	Compost-addition			N2O-N/% initial TN	0.02	0.02				pig manure and cornstalks were mixed using a ratio of 85:15 (wet weight)	60L laboratory-scale reactor		0.4 L /min	1	73.96	7.03			34.08			2.59	13.16	39.74
26	The effects of apple pomace, bentonite and calcium superphosphate on swine manure aerobic composting	China	2014	Measure	CK: 21 kg Swine manure + 2 kg wheat straw	Treatment	NH3	Compost			NH3-N/% initial TN	3	3				swine manure and wheat straw were mixed at a ratio of 10.5: 1 in fresh weight	130L composting box		60 L /min,twice per day	2		6.5	3.5		318.3g/kg Fresh manure			24.6g/kg Fresh manure		58
26	The effects of apple pomace, bentonite and calcium superphosphate on swine manure aerobic composting	China	2014	Measure	AP: 21 kg Swine manure + 2 kg wheat straw + 1.32 kg apple pomace	Treatment	NH3	Compost-addition			NH3-N/% initial TN	2.1	2.1				swine manure and wheat straw were mixed at a ratio of 10.5: 1 in fresh weight	130L composting box		60 L /min,twice per day	2		6.1	4.1		349.1g/kg Fresh manure			31.3g/kg Fresh manure		44.1
26	The effects of apple pomace, bentonite and calcium superphosphate on swine manure aerobic composting	China	2014	Measure	BN: 21 kg Swine manure + 2 kg wheat straw + 1.21 kg bentonite	Treatment	NH3	Compost-addition			NH3-N/% initial TN	4.6	4.6				swine manure and wheat straw were mixed at a ratio of 10.5: 1 in fresh weight	130L composting box		60 L /min,twice per day	2		7.2	3.5		301.3g/kg Fresh manure			27.5g/kg Fresh manure		50.3
26	The effects of apple pomace, bentonite and calcium superphosphate on swine manure aerobic composting	China	2014	Measure	CS: 21 kg Swine manure + 2 kg wheat straw + 1.21 kg calcium superphosphate	Treatment	NH3	Compost-addition			NH3-N/% initial TN	0.3	0.3				swine manure and wheat straw were mixed at a ratio of 10.5: 1 in fresh weight	130L composting box		60 L /min,twice per day	2		6.2	4.8		300g/kg Fresh manure			30.5g/kg Fresh manure		34.1
25	Comparison of biochar, zeolite and their mixture amendment for aiding organic matter transformation and nitrogen conservation during pig manure composting	China	2017	Reference:Wang, Y., Dong, H., Zhu, Z., Gerber, P.J., Xin, H., Smith, P., Opio, C.I., Steinfeld, H., & Chadwick, D.L. (2017). Mitigating Greenhouse Gas and Ammonia Emissions from Swine Manure Management: A System Analysis. Environmental science & technology, 51 8, 4503-4511 .;Jia, W., Yan, Z., Chadwick, D.R., Kang, L., Duan, Z., Bai, Z., & Chen, Q. (2015). Integrating soil testing phosphorus into …	CK	Treatment	NH3	Compost			NH3-N/% initial TN	2.48	2.48				Pig Manure and Wheat Straw were mixed at 2:1 ratio (dry weight basis)	130-L polyvinyl chloride (PVC) reactors (100-L work volume)			1	63.12	8	5.41	73.04		26.11g/kg raw material				26.78
25	Comparison of biochar, zeolite and their mixture amendment for aiding organic matter transformation and nitrogen conservation during pig manure composting	China	2017	Reference:Wang, Y., Dong, H., Zhu, Z., Gerber, P.J., Xin, H., Smith, P., Opio, C.I., Steinfeld, H., & Chadwick, D.L. (2017). Mitigating Greenhouse Gas and Ammonia Emissions from Swine Manure Management: A System Analysis. Environmental science & technology, 51 8, 4503-4511 .;Jia, W., Yan, Z., Chadwick, D.R., Kang, L., Duan, Z., Bai, Z., & Chen, Q. (2015). Integrating soil testing phosphorus into …	B	Treatment	NH3	Compost-addition			NH3-N/% initial TN	1.57	1.57				Pig Manure and Wheat Straw were mixed at 2:1 ratio (dry weight basis) and then combined with 10% biochar (B)	130-L polyvinyl chloride (PVC) reactors (100-L work volume)			1	63.12	8	5.41	73.04		26.11g/kg raw material				22.46
25	Comparison of biochar, zeolite and their mixture amendment for aiding organic matter transformation and nitrogen conservation during pig manure composting	China	2017	Reference:Wang, Y., Dong, H., Zhu, Z., Gerber, P.J., Xin, H., Smith, P., Opio, C.I., Steinfeld, H., & Chadwick, D.L. (2017). Mitigating Greenhouse Gas and Ammonia Emissions from Swine Manure Management: A System Analysis. Environmental science & technology, 51 8, 4503-4511 .;Jia, W., Yan, Z., Chadwick, D.R., Kang, L., Duan, Z., Bai, Z., & Chen, Q. (2015). Integrating soil testing phosphorus into …	Z	Treatment	NH3	Compost-addition			NH3-N/% initial TN	1.74	1.74				Pig Manure and Wheat Straw were mixed at 2:1 ratio (dry weight basis) and then combined with 10% zeolite (Z)	130-L polyvinyl chloride (PVC) reactors (100-L work volume)			1	63.12	8	5.41	73.04		26.11g/kg raw material				23.1
25	Comparison of biochar, zeolite and their mixture amendment for aiding organic matter transformation and nitrogen conservation during pig manure composting	China	2017	Reference:Wang, Y., Dong, H., Zhu, Z., Gerber, P.J., Xin, H., Smith, P., Opio, C.I., Steinfeld, H., & Chadwick, D.L. (2017). Mitigating Greenhouse Gas and Ammonia Emissions from Swine Manure Management: A System Analysis. Environmental science & technology, 51 8, 4503-4511 .;Jia, W., Yan, Z., Chadwick, D.R., Kang, L., Duan, Z., Bai, Z., & Chen, Q. (2015). Integrating soil testing phosphorus into …	B+Z	Treatment	NH3	Compost-addition			NH3-N/% initial TN	0.86	0.86				Pig Manure and Wheat Straw were mixed at 2:1 ratio (dry weight basis) and then combined with 10% biochar + 10% zeolite (B + Z)	130-L polyvinyl chloride (PVC) reactors (100-L work volume)			1	63.12	8	5.41	73.04		26.11g/kg raw material				19.72
25	Comparison of biochar, zeolite and their mixture amendment for aiding organic matter transformation and nitrogen conservation during pig manure composting	China	2017	Measure	CK	Treatment	N2O	Compost			N2O-N/% initial TN	0.79	0.79				Pig Manure and Wheat Straw were mixed at 2:1 ratio (dry weight basis)	130-L polyvinyl chloride (PVC) reactors (100-L work volume)			1	63.12	8	5.41	73.04		26.11g/kg raw material				26.78
25	Comparison of biochar, zeolite and their mixture amendment for aiding organic matter transformation and nitrogen conservation during pig manure composting	China	2017	Measure	B	Treatment	N2O	Compost-addition			N2O-N/% initial TN	0.3	0.3				Pig Manure and Wheat Straw were mixed at 2:1 ratio (dry weight basis) and then combined with 10% biochar (B)	130-L polyvinyl chloride (PVC) reactors (100-L work volume)			1	63.12	8	5.41	73.04		26.11g/kg raw material				22.46
25	Comparison of biochar, zeolite and their mixture amendment for aiding organic matter transformation and nitrogen conservation during pig manure composting	China	2017	Measure	Z	Treatment	N2O	Compost-addition			N2O-N/% initial TN	0.39	0.39				Pig Manure and Wheat Straw were mixed at 2:1 ratio (dry weight basis) and then combined with 10% zeolite (Z)	130-L polyvinyl chloride (PVC) reactors (100-L work volume)			1	63.12	8	5.41	73.04		26.11g/kg raw material				23.1
25	Comparison of biochar, zeolite and their mixture amendment for aiding organic matter transformation and nitrogen conservation during pig manure composting	China	2017	Measure	B+Z	Treatment	N2O	Compost-addition			N2O-N/% initial TN	0.19	0.19				Pig Manure and Wheat Straw were mixed at 2:1 ratio (dry weight basis) and then combined with 10% biochar + 10% zeolite (B + Z)	130-L polyvinyl chloride (PVC) reactors (100-L work volume)			1	63.12	8	5.41	73.04		26.11g/kg raw material				19.72
23	Nutrients conservation of N & P and greenhouse gas reduction of N2O emission during swine manure composting(IN CHINESE)	China	2011	measure	CK	Treatment	NH3	Compost			NH3-N/TN initial%	3.462	3.462				m(pig manure) : m(sawdust) =3. 55∶ 1	31. 8 L		Forced ventilation mode, set through on/Off = 15 s/10 min	1	74.61					20.41g/kg dry weight			22.75	/
23	Nutrients conservation of N & P and greenhouse gas reduction of N2O emission during swine manure composting(IN CHINESE)	China	2011	measure	R1 modified red-mud ( MR)	Treatment	NH3	Compost-addition			NH3-N/TN initial%	2.147	2.147				m(pig manure) : m(sawdust) =3. 55∶ 1	31. 8 L		Forced ventilation mode, set through on/Off = 15 s/10 min	1	74.61					20.41g/kg dry weight			22.75	/
23	Nutrients conservation of N & P and greenhouse gas reduction of N2O emission during swine manure composting(IN CHINESE)	China	2011	measure	R2 modified forsterite ( MF)	Treatment	NH3	Compost-addition			NH3-N/TN initial%	5.739	5.739				m(pig manure) : m(sawdust) =3. 55∶ 1	31. 8 L		Forced ventilation mode, set through on/Off = 15 s/10 min	1	74.61					20.41g/kg dry weight			22.75	/
23	Nutrients conservation of N & P and greenhouse gas reduction of N2O emission during swine manure composting(IN CHINESE)	China	2011	measure	CK	Treatment	N2O	Compost			N2O-N/TN initial%	11.219	11.219				m(pig manure) : m(sawdust) =3. 55∶ 1	31. 8 L		Forced ventilation mode, set through on/Off = 15 s/10 min	1	74.61					20.41g/kg dry weight			22.75	/
23	Nutrients conservation of N & P and greenhouse gas reduction of N2O emission during swine manure composting(IN CHINESE)	China	2011	measure	R1 modified red-mud ( MR)	Treatment	N2O	Compost-addition			N2O-N/TN initial%	8.921	8.921				m(pig manure) : m(sawdust) =3. 55∶ 1	31. 8 L		Forced ventilation mode, set through on/Off = 15 s/10 min	1	74.61					20.41g/kg dry weight			22.75	/
23	Nutrients conservation of N & P and greenhouse gas reduction of N2O emission during swine manure composting(IN CHINESE)	China	2011	measure	R2 modified forsterite ( MF)	Treatment	N2O	Compost-addition			N2O-N/TN initial%	0.645	0.645				m(pig manure) : m(sawdust) =3. 55∶ 1	31. 8 L		Forced ventilation mode, set through on/Off = 15 s/10 min	1	74.61					20.41g/kg dry weight			22.75	/
22	Evaluating environmental impacts of pig slurry treatment technologies with a life-cycle perspective, Journal of Cleaner Production	China	2018	Country Inventory	Ministry of Environmental Protectio (MEP).Guidelines for the Preparation of Atmospheric Ammonia Source Emission Inventories2014	Housing	NH3			Solid manure	NH3-N kg/kg Nmin	0.164	16.4
22	Evaluating environmental impacts of pig slurry treatment technologies with a life-cycle perspective, Journal of Cleaner Production	China	2018	Reference	M. ten Hoeve, N.J. Hutchings, G.M. Peters, M. Svanstrom, L.S. Jensen, S. Bruun Life cycle assessment of pig slurry treatment technologies for nutrient redistribution in Denmark J. Environ. Manag., 132 (2014), pp. 60-70	Housing	NH3			Pig slurry	NH3-N kg/kg Nmin	0.25	25
22	Evaluating environmental impacts of pig slurry treatment technologies with a life-cycle perspective, Journal of Cleaner Production	China	2018	Country Inventory	Ministry of Environmental Protectio (MEP).Guidelines for the Preparation of Atmospheric Ammonia Source Emission Inventories2014	Storage	NH3			Solid manure	NH3-N kg/kg Nmin	0.046	4.6
22	Evaluating environmental impacts of pig slurry treatment technologies with a life-cycle perspective, Journal of Cleaner Production	China	2018	Country Inventory	Ministry of Environmental Protectio (MEP).Guidelines for the Preparation of Atmospheric Ammonia Source Emission Inventories2014	Storage	N2O			Solid manure	N2O-N kg/kg Nmin	0.05	5
22	Evaluating environmental impacts of pig slurry treatment technologies with a life-cycle perspective, Journal of Cleaner Production	China	2018	Model-MITERA-Europe	For storage of Mdig.raw and Mdig.LF, emissions of N (NH3, N2O, NOx and N2) were calculated using the same methodology as for storage of raw slurry. For NH3 emissions, an increase of 50% in NH3 emissions (Ifstorage_dig_NH3) was assumed (Sommer, 1997; Clemens et al., 2006; Koirala et al., 2013), based on the relatively high available N content and pH in digested slurry, relative to raw slurry. Soli…	Storage	NH3			Digestate	NH3-N kg/kg Nmin	0.03	3
22	Evaluating environmental impacts of pig slurry treatment technologies with a life-cycle perspective, Journal of Cleaner Production	China	2018	Reference	M.N. Hansen, K. Henriksen, S.G. Sommer.Observations of production and emission of greenhouse gases and ammonia during storage of solids separated from pig slurry: effects of covering	Storage	NH3			Solid digestate	NH3-N kg/kg Nmin	0.003	0.3
22	Evaluating environmental impacts of pig slurry treatment technologies with a life-cycle perspective, Journal of Cleaner Production	China	2018	Reference	M.N. Hansen, K. Henriksen, S.G. Sommer Observations of production and emission of greenhouse gases and ammonia during storage of solids separated from pig slurry: effects of covering	Storage	N2O			Solid digestate	N2O-N kg/kg Nmin	0.048	4.8
22	Evaluating environmental impacts of pig slurry treatment technologies with a life-cycle perspective, Journal of Cleaner Production	China	2018	IPCC		Storage	N2O			Digestate	N2O-N kg/kg Nmin	0.005	0.5
22	Evaluating environmental impacts of pig slurry treatment technologies with a life-cycle perspective, Journal of Cleaner Production	China	2018	Reference	L. Hamelin, M. Wesnaes, H. Wenzel, B.M. Petersen Environmental consequences of future biogas technologies based on separated slurry Environmental science & technology, 45 (13) (2011), pp. 5869-5877	Application	NH3			Digestate	NH3-N kg/kg Nmin	0.138	13.8
22	Evaluating environmental impacts of pig slurry treatment technologies with a life-cycle perspective, Journal of Cleaner Production	China	2018	Reference	The average emission coefficient of Prapaspongsa et al. (2010)[LCA of comprehensive pig manure management incorporating integrated technology systems] and Wang et al. (2017).[Mitigating greenhouse gas and ammonia emissions from swine manure management: a system analysis]	Application	NH3			Solid manure	NH3-N kg/kg Nmin	0.194	19.4
22	Evaluating environmental impacts of pig slurry treatment technologies with a life-cycle perspective, Journal of Cleaner Production	China	2018	Reference	The average emission coefficient of Prapaspongsa et al. (2010)[LCA of comprehensive pig manure management incorporating integrated technology systems] and Wang et al. (2017).[Mitigating greenhouse gas and ammonia emissions from swine manure management: a system analysis]	Application	NH3			Solid digestate	NH3-N kg/kg Nmin	0.194	19.4
22	Evaluating environmental impacts of pig slurry treatment technologies with a life-cycle perspective, Journal of Cleaner Production	China	2018	Model-IGES	The land applied fertilizer, compost or biosolids emits N2O equal to 0.01 of applied N as stated by IPCC (Brown et al., 2010). However, Møller et al. (2009) used N2O emission factor equal to 0.013–0.017 of applied N to soil. Here we have used N2O emission factor 0.013 of applied N in digestate.	Application	N2O			solid	N2O-N kg/kg Nmin	0.013	1.3
22	Evaluating environmental impacts of pig slurry treatment technologies with a life-cycle perspective, Journal of Cleaner Production	China	2018	Model-MITERA-Europe	Hou, Y., Velthof, G.L., Lesschen, J.P., Staritsky, I.G., Oenema, O., 2017. Nutrient re_x005f_x005f_x0002_covery and emissions of ammonia, nitrous oxide, and methane from animal manure in europe: effects of manure treatment technologies. Environmental science & technology 51 (1), 375e383. Less than 25% of the N2O-N emissions during solid manure fifield application	Application	N2O			Digestate	N2O-N kg/kg Nmin	0.0085	0.85
22	Evaluating environmental impacts of pig slurry treatment technologies with a life-cycle perspective, Journal of Cleaner Production	China	2018	Reference	Prapaspongsa, T., Christensen, P., Schmidt, J.H., Thrane, M., 2010. LCA of comprehensive pig manure management incorporating integrated technology systems. J. Clean. Prod. 18 (14), 1413e1422.	Application	N2O			Solid digestate	N2O-N kg/kg Nmin	0.01	1
21	Nitrogenous Gas Emissions from Solid Swine Manure Under Natural Composting Conditions(in Chinese）	China	2014	Measure		Treatment	NH3	Compost-bedding			NH3-N / initial N%	1.3	1.3				The mass ratio of pig manure and mushroom residue was 8∶1, with 400 kg of pig manure and 50 kg of mushroom residue	Stacking and storage volume is the bottom area of 1.5m × 1.5m, height of 0.6m conical heap			2	67	7.1		76			0.06g/kg dry matter	37.7g/kg dry matter	6.81
21	Nitrogenous Gas Emissions from Solid Swine Manure Under Natural Composting Conditions(in Chinese）	China	2014	Measure		Treatment	N2O	Compost-bedding			N2O-N / initial N%	0.4	0.4				The mass ratio of pig manure and mushroom residue was 8∶1, with 400 kg of pig manure and 50 kg of mushroom residue	Stacking and storage volume is the bottom area of 1.5m × 1.5m, height of 0.6m conical heap			2	67	7.1		76			0.06g/kg dry matter	37.7g/kg dry matter	6.81
20	Environmental burdens of small-scale intensive pig production in China	China	2021	Country Inventory		Housing	NH3			solid	NH3-N kg / kg Nmineral	0.164	16.4
20	Environmental burdens of small-scale intensive pig production in China	China	2021	Country Inventory		Storage	NH3			solid	NH3-N kg / kg Nmineral	0.046	4.6
20	Environmental burdens of small-scale intensive pig production in China	China	2021	Reference	Hou, Y., Velthof, G. L., Lesschen, J. P., Staritsky, I. G., & Oenema, O. (2017). Nutrient Recovery and Emissions of Ammonia, Nitrous Oxide, and Methane from Animal Manure in Europe: Effects of Manure Treatment Technologies. Environmental Science & Technology, 51(1), 375-383. doi:10.1021/acs.est.6b04524	Storage	NH3			slurry	NH3-N kg / kg Nmineral	0.03	3
20	Environmental burdens of small-scale intensive pig production in China	China	2021	Country Inventory		Storage	N2O			solid	N2O-N kg / kg Nmineral	0.05	5
20	Environmental burdens of small-scale intensive pig production in China	China	2021	IPCC		Storage	N2O			slurry	N2O-N kg / kg Nmineral	0.005	0.5
19	A life cycle assessment of an enterprise's low-carbon emissions model: The Xinjiang Shihezi pig farm faecal treatment biogas project as a case study	China	2022	Reference		Storage	NH3			LC residue	kgNH3-N/kgTN	0.003	0.3
19	A life cycle assessment of an enterprise's low-carbon emissions model: The Xinjiang Shihezi pig farm faecal treatment biogas project as a case study	China	2022	Reference		Storage	NH3			AI slurry-residue (Mixed)	kgNH3-N/kgTN	0.03	3
19	A life cycle assessment of an enterprise's low-carbon emissions model: The Xinjiang Shihezi pig farm faecal treatment biogas project as a case study	China	2022	Reference		Storage	N2O			LC residue	kgN2O-N/kgTN	0.048	4.8
19	A life cycle assessment of an enterprise's low-carbon emissions model: The Xinjiang Shihezi pig farm faecal treatment biogas project as a case study	China	2022	Reference		Storage	NH3			AI slurry-residue (Mixed)	kgNH3-N/kgTN	0.0005	0.05
19	A life cycle assessment of an enterprise's low-carbon emissions model: The Xinjiang Shihezi pig farm faecal treatment biogas project as a case study	China	2022	Reference	The average emission coefficient of (Prapaspongsa et al., 2010b; Yue et al., 2017)	Application	NH3	Sow		LC solid feces	kg NH3-N/kg TN	0.194	19.4
19	A life cycle assessment of an enterprise's low-carbon emissions model: The Xinjiang Shihezi pig farm faecal treatment biogas project as a case study	China	2022	Reference	The average emission coefficient of (Prapaspongsa et al., 2010b; Yue et al., 2017)	Application	NH3	Sow		LC residue	kg NH3-N/kg TN	0.194	19.4
19	A life cycle assessment of an enterprise's low-carbon emissions model: The Xinjiang Shihezi pig farm faecal treatment biogas project as a case study	China	2022	Reference	Prapaspongsa et al., 2010b	Application	N2O	Sow		LC solid feces	kg N2O-N/kg TN	0.01	1
19	A life cycle assessment of an enterprise's low-carbon emissions model: The Xinjiang Shihezi pig farm faecal treatment biogas project as a case study	China	2022	Reference	EF(NO-N):EF(N2O-N)=1:10 (Nemecek and Kägi, 2007)	Application	N2O	Sow		LC residue	kg N2O-N/kg TN	0.013	1.3
19	A life cycle assessment of an enterprise's low-carbon emissions model: The Xinjiang Shihezi pig farm faecal treatment biogas project as a case study	China	2022	Reference	Less than 25% of the N2O-N emissions during solid feces field application (Yong et al., 2017).	Application	N2O	Sow		AI slurry-residue (Mixed)	kg N2O-N/kg TN	0.0085	0.85
19	A life cycle assessment of an enterprise's low-carbon emissions model: The Xinjiang Shihezi pig farm faecal treatment biogas project as a case study	China	2022	Reference	The approximate calculation of nitrogen emission factor of LC slurry returned by drip irrigation is 39.516≈40% of AI slurry residue.	Application	N2O	Drip irrigation		LC slurry	kg N2O-N/kg TN	0.0034	0.34
18	Environmental, economic and social analysis of peri-urban pig production.	China	2016	Reference	Liu Dong, Wang Fanghao, Ma Lin, et al. Estimation of NH3 emission factor for pig manure in China[J] . Transactions of the CSAE, 2008,24(4)：218－224.(in Chinese with English abstract)	Housing	NH3				% TN	18	18	cement floor
18	Environmental, economic and social analysis of peri-urban pig production.	China	2016	Reference	Liu Dong, Wang Fanghao, Ma Lin, et al. Estimation of NH3 emission factor for pig manure in China[J] . Transactions of the CSAE, 2008,24(4)：218－224.(in Chinese with English abstract)	Housing	NH3				% TN	15	15	leakage floor
18	Environmental, economic and social analysis of peri-urban pig production.	China	2016	Reference	Sino-German project (2012)	Storage	NH3				% TN	20	20			underground without cover
18	Environmental, economic and social analysis of peri-urban pig production.	China	2016	Reference	Sino-German project (2012)	Storage	NH3				% TN	10	10			underground with cover
18	Environmental, economic and social analysis of peri-urban pig production.	China	2016	Reference	Sino-German project (2012)	Storage	NH3				% TN	30	30			aboveground without cover
18	Environmental, economic and social analysis of peri-urban pig production.	China	2016	Reference	Sino-German project (2012)	Storage	NH3				% TN	10	10			aboveground with cover
18	Environmental, economic and social analysis of peri-urban pig production.	China	2016	Reference	Liu Dong, Wang Fanghao, Ma Lin, et al. Estimation of NH3 emission factor for pig manure in China[J] . Transactions of the CSAE, 2008,24(4)：218－224.(in Chinese with English abstract)	Treatment	NH3	Compost			% TN	30	30
18	Environmental, economic and social analysis of peri-urban pig production.	China	2016	Reference	Liu Dong, Wang Fanghao, Ma Lin, et al. Estimation of NH3 emission factor for pig manure in China[J] . Transactions of the CSAE, 2008,24(4)：218－224.(in Chinese with English abstract)	Treatment	NH3	household biogas			% TN	10	10
18	Environmental, economic and social analysis of peri-urban pig production.	China	2016	Reference	Liu Dong, Wang Fanghao, Ma Lin, et al. Estimation of NH3 emission factor for pig manure in China[J] . Transactions of the CSAE, 2008,24(4)：218－224.(in Chinese with English abstract)	Treatment	NH3	industrial biogas			% TN	2.7	2.7
18	Environmental, economic and social analysis of peri-urban pig production.	China	2016	Reference	Liu Dong, Wang Fanghao, Ma Lin, et al. Estimation of NH3 emission factor for pig manure in China[J] . Transactions of the CSAE, 2008,24(4)：218－224.(in Chinese with English abstract)	Treatment	NH3	Oxidation pond			% TN	19.5	19.5
18	Environmental, economic and social analysis of peri-urban pig production.	China	2016	Model-NUFER	L. Ma, W.Q. Ma, G.L. Velthof, et al. Modelling nutrient flows in the food chain of China J. Environ. Qual., 39 (2010), pp. 1279-1289	Housing	N2O				% TN	0.5	0.5	cement floor
18	Environmental, economic and social analysis of peri-urban pig production.	China	2016	Model-NUFER	L. Ma, W.Q. Ma, G.L. Velthof, et al. Modelling nutrient flows in the food chain of China J. Environ. Qual., 39 (2010), pp. 1279-1289	Housing	N2O				% TN	0.5	0.5	leakage floor
18	Environmental, economic and social analysis of peri-urban pig production.	China	2016	Model-NUFER	L. Ma, W.Q. Ma, G.L. Velthof, et al. Modelling nutrient flows in the food chain of China J. Environ. Qual., 39 (2010), pp. 1279-1289	Storage	N2O				% TN	0.5	0.5			underground without cover
18	Environmental, economic and social analysis of peri-urban pig production.	China	2016	Model-NUFER	L. Ma, W.Q. Ma, G.L. Velthof, et al. Modelling nutrient flows in the food chain of China J. Environ. Qual., 39 (2010), pp. 1279-1289	Storage	N2O				% TN	0.5	0.5			underground with cover
18	Environmental, economic and social analysis of peri-urban pig production.	China	2016	Model-NUFER	L. Ma, W.Q. Ma, G.L. Velthof, et al. Modelling nutrient flows in the food chain of China J. Environ. Qual., 39 (2010), pp. 1279-1289	Storage	N2O				% TN	0.5	0.5			aboveground without cover
18	Environmental, economic and social analysis of peri-urban pig production.	China	2016	Model-NUFER	L. Ma, W.Q. Ma, G.L. Velthof, et al. Modelling nutrient flows in the food chain of China J. Environ. Qual., 39 (2010), pp. 1279-1289	Storage	N2O				% TN	0.5	0.5			aboveground with cover
18	Environmental, economic and social analysis of peri-urban pig production.	China	2016	Model-NUFER	L. Ma, W.Q. Ma, G.L. Velthof, et al. Modelling nutrient flows in the food chain of China J. Environ. Qual., 39 (2010), pp. 1279-1289	Treatment	N2O	Compost			% TN	0.5	0.5
18	Environmental, economic and social analysis of peri-urban pig production.	China	2016	Model-NUFER	L. Ma, W.Q. Ma, G.L. Velthof, et al. Modelling nutrient flows in the food chain of China J. Environ. Qual., 39 (2010), pp. 1279-1289	Treatment	N2O	household biogas			% TN	0.5	0.5
18	Environmental, economic and social analysis of peri-urban pig production.	China	2016	Model-NUFER	L. Ma, W.Q. Ma, G.L. Velthof, et al. Modelling nutrient flows in the food chain of China J. Environ. Qual., 39 (2010), pp. 1279-1289	Treatment	N2O	industrial biogas			% TN	0.5	0.5
18	Environmental, economic and social analysis of peri-urban pig production.	China	2016	Model-NUFER	L. Ma, W.Q. Ma, G.L. Velthof, et al. Modelling nutrient flows in the food chain of China J. Environ. Qual., 39 (2010), pp. 1279-1289	Treatment	N2O	Oxidation pond			% TN	0.5	0.5
17	Comparison of nitrogen losses from different manure treatment and application management systems in China.	China	2022	Reference:Wang, Y., Dong, H., Zhu, Z., Gerber, P.J., Xin, H., Smith, P., Opio, C.I., Steinfeld, H., & Chadwick, D.L. (2017). Mitigating Greenhouse Gas and Ammonia Emissions from Swine Manure Management: A System Analysis. Environmental science & technology, 51 8, 4503-4511 .;Jia, W., Yan, Z., Chadwick, D.R., Kang, L., Duan, Z., Bai, Z., & Chen, Q. (2015). Integrating soil testing phosphorus into …		Housing	NH3	separator		solid-liquid separatted collection	NH3-N / % TN	14.3	14.3
17	Comparison of nitrogen losses from different manure treatment and application management systems in China.	China	2022	Reference:Wang, Y., Dong, H., Zhu, Z., Gerber, P.J., Xin, H., Smith, P., Opio, C.I., Steinfeld, H., & Chadwick, D.L. (2017). Mitigating Greenhouse Gas and Ammonia Emissions from Swine Manure Management: A System Analysis. Environmental science & technology, 51 8, 4503-4511 .;Jia, W., Yan, Z., Chadwick, D.R., Kang, L., Duan, Z., Bai, Z., & Chen, Q. (2015). Integrating soil testing phosphorus into …		Housing	NH3	separator		slurry	NH3-N / % TN	12.6	12.6
17	Comparison of nitrogen losses from different manure treatment and application management systems in China.	China	2022	Model-NUFER		Housing	N2O	separator		solid-liquid separatted collection	N2O-N / % TN	0.27	0.27
17	Comparison of nitrogen losses from different manure treatment and application management systems in China.	China	2022	Model-NUFER		Housing	N2O	separator		slurry	N2O-N / % TN	0.15	0.15
17	Comparison of nitrogen losses from different manure treatment and application management systems in China.	China	2022	Reference:Wang, Y., Dong, H., Zhu, Z., Gerber, P.J., Xin, H., Smith, P., Opio, C.I., Steinfeld, H., & Chadwick, D.L. (2017). Mitigating Greenhouse Gas and Ammonia Emissions from Swine Manure Management: A System Analysis. Environmental science & technology, 51 8, 4503-4511 .		Storage	NH3			liquid	NH3-N / % TN	31	31
17	Comparison of nitrogen losses from different manure treatment and application management systems in China.	China	2022	Reference:Wang, Y., Dong, H., Zhu, Z., Gerber, P.J., Xin, H., Smith, P., Opio, C.I., Steinfeld, H., & Chadwick, D.L. (2017). Mitigating Greenhouse Gas and Ammonia Emissions from Swine Manure Management: A System Analysis. Environmental science & technology, 51 8, 4503-4511 .		Storage	NH3			slurry	NH3-N / % TN	8.6	8.6
17	Comparison of nitrogen losses from different manure treatment and application management systems in China.	China	2022	Model-NUFER		Storage	N2O			liquid	N2O-N / % TN	0.12	0.12
17	Comparison of nitrogen losses from different manure treatment and application management systems in China.	China	2022	Model-NUFER		Storage	N2O			slurry	N2O-N / % TN	1.2	1.2
17	Comparison of nitrogen losses from different manure treatment and application management systems in China.	China	2022	Reference:Wang, Y., Dong, H., Zhu, Z., Gerber, P.J., Xin, H., Smith, P., Opio, C.I., Steinfeld, H., & Chadwick, D.L. (2017). Mitigating Greenhouse Gas and Ammonia Emissions from Swine Manure Management: A System Analysis. Environmental science & technology, 51 8, 4503-4511 .;Jia, W., Yan, Z., Chadwick, D.R., Kang, L., Duan, Z., Bai, Z., & Chen, Q. (2015). Integrating soil testing phosphorus into …		Treatment	NH3	Compost			NH3-N / % TN	23.5	23.5
17	Comparison of nitrogen losses from different manure treatment and application management systems in China.	China	2022	Reference:Wang, Y., Dong, H., Zhu, Z., Gerber, P.J., Xin, H., Smith, P., Opio, C.I., Steinfeld, H., & Chadwick, D.L. (2017). Mitigating Greenhouse Gas and Ammonia Emissions from Swine Manure Management: A System Analysis. Environmental science & technology, 51 8, 4503-4511 .;Jia, W., Yan, Z., Chadwick, D.R., Kang, L., Duan, Z., Bai, Z., & Chen, Q. (2015). Integrating soil testing phosphorus into …		Treatment	NH3	Anaerobic-Aerobic			NH3-N / % TN	0.5	0.5
17	Comparison of nitrogen losses from different manure treatment and application management systems in China.	China	2022	Model-NUFER		Treatment	N2O	Compost			N2O-N / % TN	2.8	2.8
17	Comparison of nitrogen losses from different manure treatment and application management systems in China.	China	2022	Model-NUFER		Treatment	N2O	Anaerobic-Aerobic			N2O-N / % TN	9	9
17	Comparison of nitrogen losses from different manure treatment and application management systems in China.	China	2022	Reference:Wang, Y., Dong, H., Zhu, Z., Gerber, P.J., Xin, H., Smith, P., Opio, C.I., Steinfeld, H., & Chadwick, D.L. (2017). Mitigating Greenhouse Gas and Ammonia Emissions from Swine Manure Management: A System Analysis. Environmental science & technology, 51 8, 4503-4511 .;Jia, W., Yan, Z., Chadwick, D.R., Kang, L., Duan, Z., Bai, Z., & Chen, Q. (2015). Integrating soil testing phosphorus into …		Application	NH3	Surface application		solid	NH3-N / % TN	18.4	18.4
17	Comparison of nitrogen losses from different manure treatment and application management systems in China.	China	2022	Reference:Wang, Y., Dong, H., Zhu, Z., Gerber, P.J., Xin, H., Smith, P., Opio, C.I., Steinfeld, H., & Chadwick, D.L. (2017). Mitigating Greenhouse Gas and Ammonia Emissions from Swine Manure Management: A System Analysis. Environmental science & technology, 51 8, 4503-4511 .;Jia, W., Yan, Z., Chadwick, D.R., Kang, L., Duan, Z., Bai, Z., & Chen, Q. (2015). Integrating soil testing phosphorus into …		Application	NH3	Incorporation		solid	NH3-N / % TN	2.94	2.94
17	Comparison of nitrogen losses from different manure treatment and application management systems in China.	China	2022	Reference:Wang, Y., Dong, H., Zhu, Z., Gerber, P.J., Xin, H., Smith, P., Opio, C.I., Steinfeld, H., & Chadwick, D.L. (2017). Mitigating Greenhouse Gas and Ammonia Emissions from Swine Manure Management: A System Analysis. Environmental science & technology, 51 8, 4503-4511 .;Jia, W., Yan, Z., Chadwick, D.R., Kang, L., Duan, Z., Bai, Z., & Chen, Q. (2015). Integrating soil testing phosphorus into …		Application	NH3	Surface application		liquid	NH3-N / % TN	30.28	30.28
17	Comparison of nitrogen losses from different manure treatment and application management systems in China.	China	2022	Reference:Wang, Y., Dong, H., Zhu, Z., Gerber, P.J., Xin, H., Smith, P., Opio, C.I., Steinfeld, H., & Chadwick, D.L. (2017). Mitigating Greenhouse Gas and Ammonia Emissions from Swine Manure Management: A System Analysis. Environmental science & technology, 51 8, 4503-4511 .;Jia, W., Yan, Z., Chadwick, D.R., Kang, L., Duan, Z., Bai, Z., & Chen, Q. (2015). Integrating soil testing phosphorus into …		Application	NH3	Injection		liquid	NH3-N / % TN	1.03	1.03
17	Comparison of nitrogen losses from different manure treatment and application management systems in China.	China	2022	Reference:Wang, Y., Dong, H., Zhu, Z., Gerber, P.J., Xin, H., Smith, P., Opio, C.I., Steinfeld, H., & Chadwick, D.L. (2017). Mitigating Greenhouse Gas and Ammonia Emissions from Swine Manure Management: A System Analysis. Environmental science & technology, 51 8, 4503-4511 .;Jia, W., Yan, Z., Chadwick, D.R., Kang, L., Duan, Z., Bai, Z., & Chen, Q. (2015). Integrating soil testing phosphorus into …		Application	NH3	Incorporation		liquid	NH3-N / % TN	9.86	9.86
17	Comparison of nitrogen losses from different manure treatment and application management systems in China.	China	2022	Reference:Wang, Y., Dong, H., Zhu, Z., Gerber, P.J., Xin, H., Smith, P., Opio, C.I., Steinfeld, H., & Chadwick, D.L. (2017). Mitigating Greenhouse Gas and Ammonia Emissions from Swine Manure Management: A System Analysis. Environmental science & technology, 51 8, 4503-4511 .;Jia, W., Yan, Z., Chadwick, D.R., Kang, L., Duan, Z., Bai, Z., & Chen, Q. (2015). Integrating soil testing phosphorus into …		Application	NH3	Bandspreading		liquid	NH3-N / % TN	8.61	8.61
17	Comparison of nitrogen losses from different manure treatment and application management systems in China.	China	2022	Reference:Wang, Y., Dong, H., Zhu, Z., Gerber, P.J., Xin, H., Smith, P., Opio, C.I., Steinfeld, H., & Chadwick, D.L. (2017). Mitigating Greenhouse Gas and Ammonia Emissions from Swine Manure Management: A System Analysis. Environmental science & technology, 51 8, 4503-4511 .;Jia, W., Yan, Z., Chadwick, D.R., Kang, L., Duan, Z., Bai, Z., & Chen, Q. (2015). Integrating soil testing phosphorus into …		Application	NH3	Surface application		slurry	NH3-N / % TN	30.8	30.8
17	Comparison of nitrogen losses from different manure treatment and application management systems in China.	China	2022	Reference:Wang, Y., Dong, H., Zhu, Z., Gerber, P.J., Xin, H., Smith, P., Opio, C.I., Steinfeld, H., & Chadwick, D.L. (2017). Mitigating Greenhouse Gas and Ammonia Emissions from Swine Manure Management: A System Analysis. Environmental science & technology, 51 8, 4503-4511 .;Jia, W., Yan, Z., Chadwick, D.R., Kang, L., Duan, Z., Bai, Z., & Chen, Q. (2015). Integrating soil testing phosphorus into …		Application	NH3	Injection		solid manure	NH3-N / % TN	1.03	1.03
17	Comparison of nitrogen losses from different manure treatment and application management systems in China.	China	2022	Reference:Wang, Y., Dong, H., Zhu, Z., Gerber, P.J., Xin, H., Smith, P., Opio, C.I., Steinfeld, H., & Chadwick, D.L. (2017). Mitigating Greenhouse Gas and Ammonia Emissions from Swine Manure Management: A System Analysis. Environmental science & technology, 51 8, 4503-4511 .;Jia, W., Yan, Z., Chadwick, D.R., Kang, L., Duan, Z., Bai, Z., & Chen, Q. (2015). Integrating soil testing phosphorus into …		Application	NH3	Incorporation		slurry	NH3-N / % TN	9.86	9.86
17	Comparison of nitrogen losses from different manure treatment and application management systems in China.	China	2022	Reference:Wang, Y., Dong, H., Zhu, Z., Gerber, P.J., Xin, H., Smith, P., Opio, C.I., Steinfeld, H., & Chadwick, D.L. (2017). Mitigating Greenhouse Gas and Ammonia Emissions from Swine Manure Management: A System Analysis. Environmental science & technology, 51 8, 4503-4511 .;Jia, W., Yan, Z., Chadwick, D.R., Kang, L., Duan, Z., Bai, Z., & Chen, Q. (2015). Integrating soil testing phosphorus into …		Application	NH3	Bandspreading		solid manure	NH3-N / % TN	8.61	8.61
17	Comparison of nitrogen losses from different manure treatment and application management systems in China.	China	2022	Model-NUFER		Application	N2O	Surface application		solid	N2O-N / % TN	0.008	0.008
17	Comparison of nitrogen losses from different manure treatment and application management systems in China.	China	2022	Model-NUFER		Application	N2O	Incorporation		solid	N2O-N / % TN	0.47	0.47
17	Comparison of nitrogen losses from different manure treatment and application management systems in China.	China	2022	Model-NUFER		Application	N2O	Surface application		liquid	N2O-N / % TN	0.93	0.93
17	Comparison of nitrogen losses from different manure treatment and application management systems in China.	China	2022	Model-NUFER		Application	N2O	Injection		liquid	N2O-N / % TN	2.56	2.56
17	Comparison of nitrogen losses from different manure treatment and application management systems in China.	China	2022	Model-NUFER		Application	N2O	Incorporation		liquid	N2O-N / % TN	3.65	3.65
17	Comparison of nitrogen losses from different manure treatment and application management systems in China.	China	2022	Model-NUFER		Application	N2O	Bandspreading		liquid	N2O-N / % TN	0.74	0.74
17	Comparison of nitrogen losses from different manure treatment and application management systems in China.	China	2022	Model-NUFER		Application	N2O	Surface application		slurry	N2O-N / % TN	0.93	0.93
17	Comparison of nitrogen losses from different manure treatment and application management systems in China.	China	2022	Model-NUFER		Application	N2O	Injection		solid manure	N2O-N / % TN	2.56	2.56
17	Comparison of nitrogen losses from different manure treatment and application management systems in China.	China	2022	Model-NUFER		Application	N2O	Incorporation		slurry	N2O-N / % TN	3.65	3.65
17	Comparison of nitrogen losses from different manure treatment and application management systems in China.	China	2022	Model-NUFER		Application	N2O	Bandspreading		solid manure	N2O-N / % TN	0.74	0.74
15	Efects of additive superphosphate on NH3, N2O and CH4 emissions during pig manure composting. (in Chinese with English abstract)	China	2012	Measure	CK:570kg Pig manure and corn straw	Treatment	NH3	Compost			NH3-N/TN initial%	35.7	35.7			without cover	Pig manure and corn straw were mixed according to fresh base weight 6.5:1	Fermentation bin of 1.2 cubic meters	The heap is turned every 7 days, and the turning time is 7th, 14th, 21st, 28th, 35th, 42nd and 49th	natural ventilation	2	121.3	7.72								39.2
15	Efects of additive superphosphate on NH3, N2O and CH4 emissions during pig manure composting. (in Chinese with English abstract)	China	2012	Measure	S5:570kg Pig manure and corn straw + 6kg superphosphate	Treatment	NH3	Compost-addition			NH3-N/TN initial%	27.4	27.4			without cover	Pig manure and corn straw were mixed according to fresh base weight 6.5:1	Fermentation bin of 1.2 cubic meters	The heap is turned every 7 days, and the turning time is 7th, 14th, 21st, 28th, 35th, 42nd and 49th	natural ventilation	2	102	7.5								33.8
15	Efects of additive superphosphate on NH3, N2O and CH4 emissions during pig manure composting. (in Chinese with English abstract)	China	2012	Measure	S10:570kg Pig manure and corn straw + 12.4kg superphosphate	Treatment	NH3	Compost-addition			NH3-N/TN initial%	20.7	20.7			without cover	Pig manure and corn straw were mixed according to fresh base weight 6.5:1	Fermentation bin of 1.2 cubic meters	The heap is turned every 7 days, and the turning time is 7th, 14th, 21st, 28th, 35th, 42nd and 49th	natural ventilation	2	112.2	7.12								28.9
15	Efects of additive superphosphate on NH3, N2O and CH4 emissions during pig manure composting. (in Chinese with English abstract)	China	2012	Measure	S15:570kg Pig manure and corn straw + 18.6kg superphosphate	Treatment	NH3	Compost-addition			NH3-N/TN initial%	15.7	15.7			without cover	Pig manure and corn straw were mixed according to fresh base weight 6.5:1	Fermentation bin of 1.2 cubic meters	The heap is turned every 7 days, and the turning time is 7th, 14th, 21st, 28th, 35th, 42nd and 49th	natural ventilation	2	121.4	7.13								21.8
15	Efects of additive superphosphate on NH3, N2O and CH4 emissions during pig manure composting. (in Chinese with English abstract)	China	2012	Measure	S20:570kg Pig manure and corn straw + 24.8kg superphosphate	Treatment	NH3	Compost-addition			NH3-N/TN initial%	12.9	12.9			without cover	Pig manure and corn straw were mixed according to fresh base weight 6.5:1	Fermentation bin of 1.2 cubic meters	The heap is turned every 7 days, and the turning time is 7th, 14th, 21st, 28th, 35th, 42nd and 49th	natural ventilation	2	82.5	7.17								14.3
15	Efects of additive superphosphate on NH3, N2O and CH4 emissions during pig manure composting. (in Chinese with English abstract)	China	2012	Measure	CK:570kg Pig manure and corn straw	Treatment	N2O	Compost			N2O-N/TN initial%	1	1			without cover	Pig manure and corn straw were mixed according to fresh base weight 6.5:1	Fermentation bin of 1.2 cubic meters	The heap is turned every 7 days, and the turning time is 7th, 14th, 21st, 28th, 35th, 42nd and 49th	natural ventilation	2	121.3	7.72								39.2
15	Efects of additive superphosphate on NH3, N2O and CH4 emissions during pig manure composting. (in Chinese with English abstract)	China	2012	Measure	S5:570kg Pig manure and corn straw + 6kg superphosphate	Treatment	N2O	Compost-addition			N2O-N/TN initial%	0.79	0.79			without cover	Pig manure and corn straw were mixed according to fresh base weight 6.5:1	Fermentation bin of 1.2 cubic meters	The heap is turned every 7 days, and the turning time is 7th, 14th, 21st, 28th, 35th, 42nd and 49th	natural ventilation	2	102	7.5								33.8
15	Efects of additive superphosphate on NH3, N2O and CH4 emissions during pig manure composting. (in Chinese with English abstract)	China	2012	Measure	S10:570kg Pig manure and corn straw + 12.4kg superphosphate	Treatment	N2O	Compost-addition			N2O-N/TN initial%	0.74	0.74			without cover	Pig manure and corn straw were mixed according to fresh base weight 6.5:1	Fermentation bin of 1.2 cubic meters	The heap is turned every 7 days, and the turning time is 7th, 14th, 21st, 28th, 35th, 42nd and 49th	natural ventilation	2	112.2	7.12								28.9
15	Efects of additive superphosphate on NH3, N2O and CH4 emissions during pig manure composting. (in Chinese with English abstract)	China	2012	Measure	S15:570kg Pig manure and corn straw + 18.6kg superphosphate	Treatment	N2O	Compost-addition			N2O-N/TN initial%	0.68	0.68			without cover	Pig manure and corn straw were mixed according to fresh base weight 6.5:1	Fermentation bin of 1.2 cubic meters	The heap is turned every 7 days, and the turning time is 7th, 14th, 21st, 28th, 35th, 42nd and 49th	natural ventilation	2	121.4	7.13								21.8
15	Efects of additive superphosphate on NH3, N2O and CH4 emissions during pig manure composting. (in Chinese with English abstract)	China	2012	Measure	S20:570kg Pig manure and corn straw + 24.8kg superphosphate	Treatment	N2O	Compost-addition			N2O-N/TN initial%	0.86	0.86			without cover	Pig manure and corn straw were mixed according to fresh base weight 6.5:1	Fermentation bin of 1.2 cubic meters	The heap is turned every 7 days, and the turning time is 7th, 14th, 21st, 28th, 35th, 42nd and 49th	natural ventilation	2	82.5	7.17								14.3
14	Estimation of NH3 emission factor for pig manure in China.(in Chinese with English abstract)	China	2008	Reference	Intensive farming	Housing	NH3		Growth-Finisher		% TN	18	18	Full slat
14	Estimation of NH3 emission factor for pig manure in China.(in Chinese with English abstract)	China	2008	Reference	Intensive farming	Housing	NH3		piglet		% TN	15	15	Partial slat
14	Estimation of NH3 emission factor for pig manure in China.(in Chinese with English abstract)	China	2008	Reference	Intensive farming	Housing	NH3		Sows		% TN	14.5	14.5	Partial slat
14	Estimation of NH3 emission factor for pig manure in China.(in Chinese with English abstract)	China	2008	Reference:Webb J, Misselbrook T H. A mass-flow model of ammonia emissions from UK livestock production [J]. Atmospheric Environment，2004，38 (14)：2163－2176．	Intensive farming	Storage	NH3	Anaerobic digestion			% TN	2.7	2.7
14	Estimation of NH3 emission factor for pig manure in China.(in Chinese with English abstract)	China	2008	Reference:De Bode[27] measured that the NH3 coefficient in the fermentation process of pig feces and urine was 5%-15% through experiments, and it was suggested to take 10% as the NH3 volatilization coefficient in the storage process of pig feces and urine during biogas fermentation in Chinese farmers	Intensive farming	Storage	NH3	Anaerobic digestion			% TN	10	10
14	Estimation of NH3 emission factor for pig manure in China.(in Chinese with English abstract)	China	2008	Country Inventory	Hutchings N J, Sommer S G, Andersen J M, et al. A detailed ammonia emission inventory for Denmark [J]. Atmospheric Environment，2001，35(12)：1959－1968．	Application	NH3			slurry	% TN	10	10
14	Estimation of NH3 emission factor for pig manure in China.(in Chinese with English abstract)	China	2008	Country Inventory	Hutchings N J, Sommer S G, Andersen J M, et al. A detailed ammonia emission inventory for Denmark [J]. Atmospheric Environment，2001，35(12)：1959－1968．	Application	NH3			solid	% TN	3.5	3.5
14	Estimation of NH3 emission factor for pig manure in China.(in Chinese with English abstract)	China	2008	Country Inventory	Hutchings N J, Sommer S G, Andersen J M, et al. A detailed ammonia emission inventory for Denmark [J]. Atmospheric Environment，2001，35(12)：1959－1968．	Application	NH3			solid	% TN	5	5
14	Estimation of NH3 emission factor for pig manure in China.(in Chinese with English abstract)	China	2008	Country Inventory	Hutchings N J, Sommer S G, Andersen J M, et al. A detailed ammonia emission inventory for Denmark [J]. Atmospheric Environment，2001，35(12)：1959－1968．	Application	NH3			slurry	% TN	7	7
13	N2O emission factors of full-scale animal manure windrow composting in cold and warm seasons	China	2020	Measure	cold season	Storage	N2O	Compost			% TN	0.46	0.46						Once two-week			64.02	7.95	969μS/cm	66						18.7
13	N2O emission factors of full-scale animal manure windrow composting in cold and warm seasons	China	2020	Measure	warm season	Storage	N2O	Compost			% TN	0.02	0.02						Once per week			75.83	5.94	1089μS/cm	83.31						12.85
11	Effect of C/N ratio, aeration rate and moisture content on ammonia and greenhouse gas emission during the composting.	China	2011	Measure		Treatment	NH3	Compost-bedding			NH3-N / initial N%	13.9	13.9				pig manure+corn stalk	composting vessels	turn 4 times totally	intermittent aeration 0.24 L/kg DM.min	2	64.1	8.6			348 g/kg DM	23.6 g/kg DM	1.83 g/kg DM		14.7	21.3
11	Effect of C/N ratio, aeration rate and moisture content on ammonia and greenhouse gas emission during the composting.	China	2011	Measure		Treatment	NH3	Compost-bedding			NH3-N / initial N%	18.7	18.7				pig manure+corn stalk	composting vessels	turn 4 times totally	intermittent aeration 0.48 L/kg DM.min	2	65.2	8.5			380 g/kg DM	20.8 g/kg DM	1.25 g/kg DM		18.3	26.6
11	Effect of C/N ratio, aeration rate and moisture content on ammonia and greenhouse gas emission during the composting.	China	2011	Measure		Treatment	NH3	Compost-bedding			NH3-N / initial N%	20.6	20.6				pig manure+corn stalk	composting vessels	turn 4 times totally	intermittent aeration 0.72 L/kg DM.min	2	63.7	8.3			394 g/kg DM	19 g/kg DM	0.9 g/kg DM		20.7	30.6
11	Effect of C/N ratio, aeration rate and moisture content on ammonia and greenhouse gas emission during the composting.	China	2011	Measure		Treatment	NH3	Compost-bedding			NH3-N / initial N%	12.7	12.7				pig manure+corn stalk	composting vessels	turn 4 times totally	intermittent aeration 0.24 L/kg DM.min	2	71.3	8.5			380 g/kg DM	20.6 g/kg DM	1.48 g/kg DM		18.4	22
11	Effect of C/N ratio, aeration rate and moisture content on ammonia and greenhouse gas emission during the composting.	China	2011	Measure		Treatment	NH3	Compost-bedding			NH3-N / initial N%	16.9	16.9				pig manure+corn stalk	composting vessels	turn 4 times totally	intermittent aeration 0.48 L/kg DM.min	2	70.6	8.3			401 g/kg DM	19 g/kg DM	1.25 g/kg DM		21.1	28.4
11	Effect of C/N ratio, aeration rate and moisture content on ammonia and greenhouse gas emission during the composting.	China	2011	Measure		Treatment	NH3	Compost-bedding			NH3-N / initial N%	32.4	32.4				pig manure+corn stalk	composting vessels	turn 4 times totally	intermittent aeration 0.72 L/kg DM.min	2	70.8	8.7			352 g/kg DM	23.5 g/kg DM	2.02 g/kg DM		15	45.9
11	Effect of C/N ratio, aeration rate and moisture content on ammonia and greenhouse gas emission during the composting.	China	2011	Measure		Treatment	NH3	Compost-bedding			NH3-N / initial N%	9.6	9.6				pig manure+corn stalk	composting vessels	turn 4 times totally	intermittent aeration 0.24 L/kg DM.min	2	75.7	8.4			409 g/kg DM	19.3 g/kg DM	0.9 g/kg DM		21.2	18.4
11	Effect of C/N ratio, aeration rate and moisture content on ammonia and greenhouse gas emission during the composting.	China	2011	Measure		Treatment	NH3	Compost-bedding			NH3-N / initial N%	27.7	27.7				pig manure+corn stalk	composting vessels	turn 4 times totally	intermittent aeration 0.48 L/kg DM.min	2	76.8	8.6			353 g/kg DM	23.7 g/kg DM	2.25 g/kg DM		14.9	40.3
11	Effect of C/N ratio, aeration rate and moisture content on ammonia and greenhouse gas emission during the composting.	China	2011	Measure		Treatment	NH3	Compost-bedding			NH3-N / initial N%	24.9	24.9				pig manure+corn stalk	composting vessels	turn 4 times totally	intermittent aeration 0.72 L/kg DM.min	2	74	8.6			376 g/kg DM	20.9 g/kg DM	1.64 g/kg DM		18	35.3
11	Effect of C/N ratio, aeration rate and moisture content on ammonia and greenhouse gas emission during the composting.	China	2011	Measure		Treatment	N2O	Compost-bedding			N2O-N / initial N%	1.6	1.6				pig manure+corn stalk	composting vessels	turn 4 times totally	intermittent aeration 0.24 L/kg DM.min	2	64.1	8.6			348 g/kg DM	23.6 g/kg DM	1.83 g/kg DM		14.7	21.3
11	Effect of C/N ratio, aeration rate and moisture content on ammonia and greenhouse gas emission during the composting.	China	2011	Measure		Treatment	N2O	Compost-bedding			N2O-N / initial N%	4.2	4.2				pig manure+corn stalk	composting vessels	turn 4 times totally	intermittent aeration 0.48 L/kg DM.min	2	65.2	8.5			380 g/kg DM	20.8 g/kg DM	1.25 g/kg DM		18.3	26.6
11	Effect of C/N ratio, aeration rate and moisture content on ammonia and greenhouse gas emission during the composting.	China	2011	Measure		Treatment	N2O	Compost-bedding			N2O-N / initial N%	5.3	5.3				pig manure+corn stalk	composting vessels	turn 4 times totally	intermittent aeration 0.72 L/kg DM.min	2	63.7	8.3			394 g/kg DM	19 g/kg DM	0.9 g/kg DM		20.7	30.6
11	Effect of C/N ratio, aeration rate and moisture content on ammonia and greenhouse gas emission during the composting.	China	2011	Measure		Treatment	N2O	Compost-bedding			N2O-N / initial N%	1.5	1.5				pig manure+corn stalk	composting vessels	turn 4 times totally	intermittent aeration 0.24 L/kg DM.min	2	71.3	8.5			380 g/kg DM	20.6 g/kg DM	1.48 g/kg DM		18.4	22
11	Effect of C/N ratio, aeration rate and moisture content on ammonia and greenhouse gas emission during the composting.	China	2011	Measure		Treatment	N2O	Compost-bedding			N2O-N / initial N%	5	5				pig manure+corn stalk	composting vessels	turn 4 times totally	intermittent aeration 0.48 L/kg DM.min	2	70.6	8.3			401 g/kg DM	19 g/kg DM	1.25 g/kg DM		21.1	28.4
11	Effect of C/N ratio, aeration rate and moisture content on ammonia and greenhouse gas emission during the composting.	China	2011	Measure		Treatment	N2O	Compost-bedding			N2O-N / initial N%	7.3	7.3				pig manure+corn stalk	composting vessels	turn 4 times totally	intermittent aeration 0.72 L/kg DM.min	2	70.8	8.7			352 g/kg DM	23.5 g/kg DM	2.02 g/kg DM		15	45.9
11	Effect of C/N ratio, aeration rate and moisture content on ammonia and greenhouse gas emission during the composting.	China	2011	Measure		Treatment	N2O	Compost-bedding			N2O-N / initial N%	2.1	2.1				pig manure+corn stalk	composting vessels	turn 4 times totally	intermittent aeration 0.24 L/kg DM.min	2	75.7	8.4			409 g/kg DM	19.3 g/kg DM	0.9 g/kg DM		21.2	18.4
11	Effect of C/N ratio, aeration rate and moisture content on ammonia and greenhouse gas emission during the composting.	China	2011	Measure		Treatment	N2O	Compost-bedding			N2O-N / initial N%	3.8	3.8				pig manure+corn stalk	composting vessels	turn 4 times totally	intermittent aeration 0.48 L/kg DM.min	2	76.8	8.6			353 g/kg DM	23.7 g/kg DM	2.25 g/kg DM		14.9	40.3
11	Effect of C/N ratio, aeration rate and moisture content on ammonia and greenhouse gas emission during the composting.	China	2011	Measure		Treatment	N2O	Compost-bedding			N2O-N / initial N%	5.2	5.2				pig manure+corn stalk	composting vessels	turn 4 times totally	intermittent aeration 0.72 L/kg DM.min	2	74	8.6			376 g/kg DM	20.9 g/kg DM	1.64 g/kg DM		18	35.3
10	Effect of turning and covering on greenhouse gas and ammonia emissions during the winter composting.	China	2011	Measure		Treatment	NH3	Compost-bedding			NH3-N / initial N%	29.5	29.5			uncovered	pig manure+corn stalk		turn 1 per week		1	71.8				361 g/kg DM		4.62 g/kg DM	27.9 g/kg DM	12.9
10	Effect of turning and covering on greenhouse gas and ammonia emissions during the winter composting.	China	2011	Measure		Treatment	NH3	Compost-bedding			NH3-N / initial N%	26.6	26.6			covered	pig manure+corn stalk		turn 1 per week		1	71.8				361 g/kg DM		4.62 g/kg DM	27.9 g/kg DM	12.9
10	Effect of turning and covering on greenhouse gas and ammonia emissions during the winter composting.	China	2011	Measure		Treatment	NH3	Compost-bedding			NH3-N / initial N%	27.9	27.9			uncovered	pig manure+corn stalk		turn 2 per week		1	71.8				361 g/kg DM		4.62 g/kg DM	27.9 g/kg DM	12.9
10	Effect of turning and covering on greenhouse gas and ammonia emissions during the winter composting.	China	2011	Measure		Treatment	NH3	Compost-bedding			NH3-N / initial N%	23.7	23.7			covered	pig manure+corn stalk		turn 2 per week		1	71.8				361 g/kg DM		4.62 g/kg DM	27.9 g/kg DM	12.9
10	Effect of turning and covering on greenhouse gas and ammonia emissions during the winter composting.	China	2011	Measure		Treatment	NH3	Compost-bedding			NH3-N / initial N%	12.8	12.8			uncovered	pig manure+corn stalk		turn 0 per week		1	71.8				361 g/kg DM		4.62 g/kg DM	27.9 g/kg DM	12.9
10	Effect of turning and covering on greenhouse gas and ammonia emissions during the winter composting.	China	2011	Measure		Treatment	NH3	Compost-bedding			NH3-N / initial N%	10.3	10.3			covered	pig manure+corn stalk		turn 0 per week		1	71.8				361 g/kg DM		4.62 g/kg DM	27.9 g/kg DM	12.9
10	Effect of turning and covering on greenhouse gas and ammonia emissions during the winter composting.	China	2011	Measure		Treatment	N2O	Compost-bedding			NO2-N / initial N%	0.81	0.81			uncovered	pig manure+corn stalk		turn 1 per week		1	71.8				361 g/kg DM		4.62 g/kg DM	27.9 g/kg DM	12.9
10	Effect of turning and covering on greenhouse gas and ammonia emissions during the winter composting.	China	2011	Measure		Treatment	N2O	Compost-bedding			NO2-N / initial N%	0.96	0.96			covered	pig manure+corn stalk		turn 1 per week		1	71.8				361 g/kg DM		4.62 g/kg DM	27.9 g/kg DM	12.9
10	Effect of turning and covering on greenhouse gas and ammonia emissions during the winter composting.	China	2011	Measure		Treatment	N2O	Compost-bedding			NO2-N / initial N%	1.05	1.05			uncovered	pig manure+corn stalk		turn 2 per week		1	71.8				361 g/kg DM		4.62 g/kg DM	27.9 g/kg DM	12.9
10	Effect of turning and covering on greenhouse gas and ammonia emissions during the winter composting.	China	2011	Measure		Treatment	N2O	Compost-bedding			NO2-N / initial N%	1.07	1.07			covered	pig manure+corn stalk		turn 2 per week		1	71.8				361 g/kg DM		4.62 g/kg DM	27.9 g/kg DM	12.9
10	Effect of turning and covering on greenhouse gas and ammonia emissions during the winter composting.	China	2011	Measure		Treatment	N2O	Compost-bedding			NO2-N / initial N%	3.93	3.93			uncovered	pig manure+corn stalk		turn 0 per week		1	71.8				361 g/kg DM		4.62 g/kg DM	27.9 g/kg DM	12.9
10	Effect of turning and covering on greenhouse gas and ammonia emissions during the winter composting.	China	2011	Measure		Treatment	N2O	Compost-bedding			NO2-N / initial N%	2.94	2.94			covered	pig manure+corn stalk		turn 0 per week		1	71.8				361 g/kg DM		4.62 g/kg DM	27.9 g/kg DM	12.9
9	Effects of aeration method and aeration rate on greenhouse gas emissions during composting of pig feces in pilot scale.	China	2015	Measure		Treatment	NH3	Compost-bedding			NH3-N / initial N%	18.5	18.5				pig feces:corn stalks	rotting box	turn 4 times totally	without aeration	2	63.6				367	21.2 g/kg DM	5.7 g/kg DM		17.3
9	Effects of aeration method and aeration rate on greenhouse gas emissions during composting of pig feces in pilot scale.	China	2015	Measure		Treatment	NH3	Compost-bedding			NH3-N / initial N%	20.2	20.2				pig feces:corn stalks	rotting box	turn 4 times totally	continuous aeration 0.18 L/kg DM.min	2	63.6				367	21.2 g/kg DM	5.7 g/kg DM		17.3
9	Effects of aeration method and aeration rate on greenhouse gas emissions during composting of pig feces in pilot scale.	China	2015	Measure		Treatment	NH3	Compost-bedding			NH3-N / initial N%	31.5	31.5				pig feces:corn stalks	rotting box	turn 4 times totally	continuous aeration 0.36 L/kg DM.min	2	63.6				367	21.2 g/kg DM	5.7 g/kg DM		17.3
9	Effects of aeration method and aeration rate on greenhouse gas emissions during composting of pig feces in pilot scale.	China	2015	Measure		Treatment	NH3	Compost-bedding			NH3-N / initial N%	40.1	40.1				pig feces:corn stalks	rotting box	turn 4 times totally	continuous aeration 0.54 L/kg DM.min	2	63.6				367	21.2 g/kg DM	5.7 g/kg DM		17.3
9	Effects of aeration method and aeration rate on greenhouse gas emissions during composting of pig feces in pilot scale.	China	2015	Measure		Treatment	NH3	Compost-bedding			NH3-N / initial N%	25.3	25.3				pig feces:corn stalks	rotting box	turn 4 times totally	intermittent aeration 0.54 L/kg DM.min	2	63.6				367	21.2 g/kg DM	5.7 g/kg DM		17.3
9	Effects of aeration method and aeration rate on greenhouse gas emissions during composting of pig feces in pilot scale.	China	2015	Measure		Treatment	N2O	Compost-bedding			NO2-N / initial N%	1.4	1.4				pig feces:corn stalks	rotting box	turn 4 times totally	without aeration	2	63.6				367	21.2 g/kg DM	5.7 g/kg DM		17.3
9	Effects of aeration method and aeration rate on greenhouse gas emissions during composting of pig feces in pilot scale.	China	2015	Measure		Treatment	N2O	Compost-bedding			NO2-N / initial N%	1.2	1.2				pig feces:corn stalks	rotting box	turn 4 times totally	continuous aeration 0.18 L/kg DM.min	2	63.6				367	21.2 g/kg DM	5.7 g/kg DM		17.3
9	Effects of aeration method and aeration rate on greenhouse gas emissions during composting of pig feces in pilot scale.	China	2015	Measure		Treatment	N2O	Compost-bedding			NO2-N / initial N%	1.7	1.7				pig feces:corn stalks	rotting box	turn 4 times totally	continuous aeration 0.36 L/kg DM.min	2	63.6				367	21.2 g/kg DM	5.7 g/kg DM		17.3
9	Effects of aeration method and aeration rate on greenhouse gas emissions during composting of pig feces in pilot scale.	China	2015	Measure		Treatment	N2O	Compost-bedding			NO2-N / initial N%	2.7	2.7				pig feces:corn stalks	rotting box	turn 4 times totally	continuous aeration 0.54 L/kg DM.min	2	63.6				367	21.2 g/kg DM	5.7 g/kg DM		17.3
9	Effects of aeration method and aeration rate on greenhouse gas emissions during composting of pig feces in pilot scale.	China	2015	Measure		Treatment	N2O	Compost-bedding			NO2-N / initial N%	2.5	2.5				pig feces:corn stalks	rotting box	turn 4 times totally	intermittent aeration 0.54 L/kg DM.min	2	63.6				367	21.2 g/kg DM	5.7 g/kg DM		17.3
6	Mitigation of ammonia, nitrous oxide and methane emissions from manure management chains: a meta-analysis and integrated assessment.	China	2014	Reference:Philippe et al. 2011,2012		Housing	N2O			solid	% TN	3.5	3.5
6	Mitigation of ammonia, nitrous oxide and methane emissions from manure management chains: a meta-analysis and integrated assessment.	China	2014	IPCC, 2006		Storage	N2O			liquid	% TN	0.01	0.01
6	Mitigation of ammonia, nitrous oxide and methane emissions from manure management chains: a meta-analysis and integrated assessment.	China	2014	IPCC, 2006		Storage	N2O			liquid	% TN	1	1
6	Mitigation of ammonia, nitrous oxide and methane emissions from manure management chains: a meta-analysis and integrated assessment.	China	2014	IPCC, 2006		Storage	N2O			solid	% TN	5	5
6	Mitigation of ammonia, nitrous oxide and methane emissions from manure management chains: a meta-analysis and integrated assessment.	China	2014	IPCC, 2006		Storage	N2O			solid	% TN	1	1
3	Emissions of NH3, N2O, and NO from Swine Manure Solid Storage in Winter. Environ.(in Chinese with English abstract)	China	2014	Measure		Storage	NH3	Solid storage			% TN	2.1	2.1			covered					1	77.53	6.2	550μS/cm						6.53
3	Emissions of NH3, N2O, and NO from Swine Manure Solid Storage in Winter. Environ.(in Chinese with English abstract)	China	2014	Measure		Storage	NH3	Solid storage			% TN	0.02	0.02			covered					1	77.53	6.2	550μS/cm						6.53
3	Emissions of NH3, N2O, and NO from Swine Manure Solid Storage in Winter. Environ.(in Chinese with English abstract)	China	2014	Measure		Storage	N2O	Solid storage			% TN	2.6	2.6			uncovered					1	77.53	6.2	550μS/cm						6.53
3	Emissions of NH3, N2O, and NO from Swine Manure Solid Storage in Winter. Environ.(in Chinese with English abstract)	China	2014	Measure		Storage	N2O	Solid storage			% TN	0.02	0.02			uncovered					1	77.53	6.2	550μS/cm						6.53
1	Changes in pig production in China and their effects on nitrogen and phosphorus use and losses.	China	2014	Reference：Food and agriculture organization (FAO). http://faostat.fao.org/ site/291/default.aspx. 2013.	Scenario S1：Adoption of Low-Emission Pig Housing and Manure Storage Facilities；Scenario S6 ：Combination of S1, S2, S3, S4, S5, and S6.（Industrial farm）	Housing	NH3				% TN	5	5
1	Changes in pig production in China and their effects on nitrogen and phosphorus use and losses.	China	2014	Reference：Food and agriculture organization (FAO). http://faostat.fao.org/ site/291/default.aspx. 2013.	Scenario S1：Adoption of Low-Emission Pig Housing and Manure Storage Facilities；Scenario S6 ：Combination of S1, S2, S3, S4, S5, and S6.（Medium farm）	Housing	NH3				% TN	5	5
1	Changes in pig production in China and their effects on nitrogen and phosphorus use and losses.	China	2014	Reference：Food and agriculture organization (FAO). http://faostat.fao.org/ site/291/default.aspx. 2013.	Scenario S2：Improved Manure and Fertilizer Management.；Scenario S3：A Ban on Manure Discharge.；Scenario S4：Improved Herd Management；Scenario S5：Precision Feeding with Improved Feed(Industrial farm)	Housing	NH3				% TN	14	14
1	Changes in pig production in China and their effects on nitrogen and phosphorus use and losses.	China	2014	Reference：Food and agriculture organization (FAO). http://faostat.fao.org/ site/291/default.aspx. 2013.	Scenario S2：Improved Manure and Fertilizer Management.；Scenario S3：A Ban on Manure Discharge.；Scenario S4：Improved Herd Management；Scenario S5：Precision Feeding with Improved Feed(Medium farm)	Housing	NH3				% TN	14	14
1	Changes in pig production in China and their effects on nitrogen and phosphorus use and losses.	China	2014	Reference：Food and agriculture organization (FAO). http://faostat.fao.org/ site/291/default.aspx. 2013.	Scenario S1：Adoption of Low-Emission Pig Housing and Manure Storage Facilities；Scenario S6 ：Combination of S1, S2, S3, S4, S5, and S6.（Industrial farm）	Housing	N2O				% TN	0.1	0.1
1	Changes in pig production in China and their effects on nitrogen and phosphorus use and losses.	China	2014	Reference：Food and agriculture organization (FAO). http://faostat.fao.org/ site/291/default.aspx. 2013.	Scenario S1：Adoption of Low-Emission Pig Housing and Manure Storage Facilities；Scenario S6 ：Combination of S1, S2, S3, S4, S5, and S6.（Medium farm）	Housing	N2O				% TN	0.1	0.1
1	Changes in pig production in China and their effects on nitrogen and phosphorus use and losses.	China	2014	Reference：Food and agriculture organization (FAO). http://faostat.fao.org/ site/291/default.aspx. 2013.	Scenario S2：Improved Manure and Fertilizer Management.；Scenario S3：A Ban on Manure Discharge.；Scenario S4：Improved Herd Management；Scenario S5：Precision Feeding with Improved Feed(Industrial farm)	Housing	N2O				% TN	0.1	0.1
1	Changes in pig production in China and their effects on nitrogen and phosphorus use and losses.	China	2014	Reference：Food and agriculture organization (FAO). http://faostat.fao.org/ site/291/default.aspx. 2013.	Scenario S2：Improved Manure and Fertilizer Management.；Scenario S3：A Ban on Manure Discharge.；Scenario S4：Improved Herd Management；Scenario S5：Precision Feeding with Improved Feed(Medium farm)	Housing	N2O				% TN	0.1	0.1
Part3：Other greenhouse gas emission factors by different units
1,Basic information											2,Emission data			3,Technology details							4,Physicochemical property
ID	Reference	Country	Year	Methodology（Source of Data）	Note	Stage	Gas	Details	Growth stage	Manure type	Original units	Value	% TN	Floor type	Removal type	Cover type	Compost material type	Compost system type	Turning type	Ventilation type	Classification (1 for manure, 2 for mixture)	Moisture (%)	pH	Ec (ms/cm)	TOM(%)	TOC(%)	TKN(%)	TAN(%)	TN(%)	C/N	TN loss/Initial N %
33	Compost supplementation with nitrogen loss and greenhouse gas emissions during pig manure composting	China	2020	Measure	pig manure + wheat straw	Treatment	CH4	Compost			% Initial C	4.3					wheat straw(WS and PM) were mixed with 1:2 (w/w）	130-L reactors with 100-L net capacity				55.08	8.52	2.33	70.53	40.91	3.15			12.99	23.89
33	Compost supplementation with nitrogen loss and greenhouse gas emissions during pig manure composting	China	2020	Measure	pig manure + wheat straw + 15% bean dreg	Treatment	CH4	Compost-addition			% Initial C	7.21					wheat straw(WS and PM) were mixed with 1:2 (w/w）	130-L reactors with 100-L net capacity				55.08	8.52	2.33	70.53	40.91	3.15			12.99	30.01
33	Compost supplementation with nitrogen loss and greenhouse gas emissions during pig manure composting	China	2020	Measure	pig manure + wheat straw + 10% biochar	Treatment	CH4	Compost-addition			% Initial C	3.31					wheat straw(WS and PM) were mixed with 1:2 (w/w）	130-L reactors with 100-L net capacity			1	55.08	8.52	2.33	70.53	40.91	3.15			12.99	16.59
33	Compost supplementation with nitrogen loss and greenhouse gas emissions during pig manure composting	China	2020	Measure	pig manure + wheat straw + 15% bean dregs + 10% biochar	Treatment	CH4	Compost-addition			% Initial C	3.92					wheat straw(WS and PM) were mixed with 1:2 (w/w）	130-L reactors with 100-L net capacity			1	55.08	8.52	2.33	70.53	40.91	3.15			12.99	22.73
32	Effects of multiple antibiotics on greenhouse gas and ammonia emissions during swine manure composting.	China	2020	Measure	CK	Treatment	N2O	Compost			g/kg Dry weight	0.014					Sawdust	20L cylindrical polyethylene reactors(0.2 m in diameter and 0.65 m in height)		0.4 L/min	1	71.3	8.38			37.2			3.39	11
32	Effects of multiple antibiotics on greenhouse gas and ammonia emissions during swine manure composting.	China	2020	Measure	NOR (spiked with 5 mg kg−1 DW norfloxacin)	Treatment	N2O	Compost-addition			g/kg Dry weight	0.014					Sawdust	20L cylindrical polyethylene reactors(0.2 m in diameter and 0.65 m in height)		0.4 L/min	1	71.3	8.38			37.2			3.39	11
32	Effects of multiple antibiotics on greenhouse gas and ammonia emissions during swine manure composting.	China	2020	Measure	SMZ (spiked with 5 mg kg−1 DW sulfamethoxazole)	Treatment	N2O	Compost-addition			g/kg Dry weight	0.013					Sawdust	20L cylindrical polyethylene reactors(0.2 m in diameter and 0.65 m in height)		0.4 L/min	1	71.3	8.38			37.2			3.39	11
32	Effects of multiple antibiotics on greenhouse gas and ammonia emissions during swine manure composting.	China	2020	Measure	SN (spiked with 5 mg kg−1 DW sulfamethoxazole and 5 mg kg−1 DW norfloxacin)	Treatment	N2O	Compost-addition			g/kg Dry weight	0.013					Sawdust	20L cylindrical polyethylene reactors(0.2 m in diameter and 0.65 m in height)		0.4 L/min	1	71.3	8.38			37.2			3.39	11
32	Effects of multiple antibiotics on greenhouse gas and ammonia emissions during swine manure composting.	China	2020	Measure	CK	Treatment	CH4	Compost			g/kg Dry weight	0.116					Sawdust	20L cylindrical polyethylene reactors(0.2 m in diameter and 0.65 m in height)		0.4 L/min	1	71.3	8.38			37.2			3.39	11
32	Effects of multiple antibiotics on greenhouse gas and ammonia emissions during swine manure composting.	China	2020	Measure	NOR (spiked with 5 mg kg−1 DW norfloxacin)	Treatment	CH4	Compost-addition			g/kg Dry weight	0.108					Sawdust	20L cylindrical polyethylene reactors(0.2 m in diameter and 0.65 m in height)		0.4 L/min	1	71.3	8.38			37.2			3.39	11
32	Effects of multiple antibiotics on greenhouse gas and ammonia emissions during swine manure composting.	China	2020	Measure	SMZ (spiked with 5 mg kg−1 DW sulfamethoxazole)	Treatment	CH4	Compost-addition			g/kg Dry weight	0.088					Sawdust	20L cylindrical polyethylene reactors(0.2 m in diameter and 0.65 m in height)		0.4 L/min	1	71.3	8.38			37.2			3.39	11
32	Effects of multiple antibiotics on greenhouse gas and ammonia emissions during swine manure composting.	China	2020	Measure	SN (spiked with 5 mg kg−1 DW sulfamethoxazole and 5 mg kg−1 DW norfloxacin)	Treatment	CH4	Compost-addition			g/kg Dry weight	0.084					Sawdust	20L cylindrical polyethylene reactors(0.2 m in diameter and 0.65 m in height)		0.4 L/min	1	71.3	8.38			37.2			3.39	11
31	Ammonia and greenhouse gas emissions from biogas digester effluent stored at different depths	China	2014	Measure	1.0 m Storage Depth	Treatment	NH3	biogas digester			mg/m3/d	1905						Dynamic emission vessel (DEV)			1
31	Ammonia and greenhouse gas emissions from biogas digester effluent stored at different depths	China	2014	Measure	1.5 m Storage Depth	Treatment	NH3	biogas digester			mg/m3/d	1315						Dynamic emission vessel (DEV)			1
31	Ammonia and greenhouse gas emissions from biogas digester effluent stored at different depths	China	2014	Measure	2.0 m Storage Depth	Treatment	NH3	biogas digester			mg/m3/d	921						Dynamic emission vessel (DEV)			1
31	Ammonia and greenhouse gas emissions from biogas digester effluent stored at different depths	China	2014	Measure	1.0 m Storage Depth	Treatment	N2O	biogas digester			mg/m3/d	6.7						Dynamic emission vessel (DEV)			1
31	Ammonia and greenhouse gas emissions from biogas digester effluent stored at different depths	China	2014	Measure	1.5 m Storage Depth	Treatment	N2O	biogas digester			mg/m3/d	5						Dynamic emission vessel (DEV)			1
31	Ammonia and greenhouse gas emissions from biogas digester effluent stored at different depths	China	2014	Measure	2.0 m Storage Depth	Treatment	N2O	biogas digester			mg/m3/d	3.4						Dynamic emission vessel (DEV)			1
31	Ammonia and greenhouse gas emissions from biogas digester effluent stored at different depths	China	2014	Measure	1.0 m Storage Depth	Treatment	CH4	biogas digester			g CH4 m-3 d-1	9.1						Dynamic emission vessel (DEV)			1
31	Ammonia and greenhouse gas emissions from biogas digester effluent stored at different depths	China	2014	Measure	1.5 m Storage Depth	Treatment	CH4	biogas digester			g CH4 m-3 d-1	10.1						Dynamic emission vessel (DEV)			1
31	Ammonia and greenhouse gas emissions from biogas digester effluent stored at different depths	China	2014	Measure	2.0 m Storage Depth	Treatment	CH4	biogas digester			g CH4 m-3 d-1	10.1						Dynamic emission vessel (DEV)			1
30	Influence of bulking agents on CH4, N2O, and NH3 emissions during rapid composting of pig manure from the Chinese Ganqinfen system	China	2014	Measure	23.7kg pig manure:3.95kg corn stalk	Treatment	NH3	Compost-bedding			g/kg dry weight	1.50827					corn stalk	composting reactors 60 L	Composting was performed throughout one month with turning on Days 5, 7, 14, and 22	160L/h	1	75	8.7			350g/kg dry weight			27g/kg dry matter	12.9	19.42
30	Influence of bulking agents on CH4, N2O, and NH3 emissions during rapid composting of pig manure from the Chinese Ganqinfen system	China	2014	Measure	13.57kg pig manure:15.08kg spent mushroom compost	Treatment	NH3	Compost-bedding			g/kg dry weight	1.39759					spent mushroom compost	composting reactors 60 L	Composting was performed throughout one month with turning on Days 5, 7, 14, and 22	160L/h	1	75	8.7			350g/kg dry matter			27g/kg dry matter	12.9	11.16
30	Influence of bulking agents on CH4, N2O, and NH3 emissions during rapid composting of pig manure from the Chinese Ganqinfen system	China	2014	Measure	25kg pig manure:5kg sawdust	Treatment	NH3	Compost-bedding			g/kg dry weight	2.68578					sawdust	composting reactors 60 L	Composting was performed throughout one month with turning on Days 5, 7, 14, and 22	160L/h	1	75	8.7			350g/kg dry matter			27g/kg dry matter	12.9	35.69
30	Influence of bulking agents on CH4, N2O, and NH3 emissions during rapid composting of pig manure from the Chinese Ganqinfen system	China	2014	Measure	23.7kg pig manure:3.95kg corn stalk	Treatment	N2O	Compost-bedding			g/kg dry weight	0.0815877					corn stalk	composting reactors 60 L	Composting was performed throughout one month with turning on Days 5, 7, 14, and 22	160L/h	1	75	8.7			350g/kg dry weight			27g/kg dry matter	12.9	19.42
30	Influence of bulking agents on CH4, N2O, and NH3 emissions during rapid composting of pig manure from the Chinese Ganqinfen system	China	2014	Measure	13.57kg pig manure:15.08kg spent mushroom compost	Treatment	N2O	Compost-bedding			g/kg dry weight	0.0512048					spent mushroom compost	composting reactors 60 L	Composting was performed throughout one month with turning on Days 5, 7, 14, and 22	160L/h	1	75	8.7			350g/kg dry matter			27g/kg dry matter	12.9	11.16
30	Influence of bulking agents on CH4, N2O, and NH3 emissions during rapid composting of pig manure from the Chinese Ganqinfen system	China	2014	Measure	25kg pig manure:5kg sawdust	Treatment	N2O	Compost-bedding			g/kg dry weight	0.050237					sawdust	composting reactors 60 L	Composting was performed throughout one month with turning on Days 5, 7, 14, and 22	160L/h	1	75	8.7			350g/kg dry matter			27g/kg dry matter	12.9	35.69
30	Influence of bulking agents on CH4, N2O, and NH3 emissions during rapid composting of pig manure from the Chinese Ganqinfen system	China	2014	Measure	23.7kg pig manure:3.95kg corn stalk	Treatment	CH4	Compost-bedding			g/kg dry weight	6.33958					corn stalk	composting reactors 60 L	Composting was performed throughout one month with turning on Days 5, 7, 14, and 22	160L/h	1	75	8.7			350g/kg dry weight			27g/kg dry matter	12.9	19.42
30	Influence of bulking agents on CH4, N2O, and NH3 emissions during rapid composting of pig manure from the Chinese Ganqinfen system	China	2014	Measure	13.57kg pig manure:15.08kg spent mushroom compost	Treatment	CH4	Compost-bedding			g/kg dry weight	11.5211					spent mushroom compost	composting reactors 60 L	Composting was performed throughout one month with turning on Days 5, 7, 14, and 22	160L/h	1	75	8.7			350g/kg dry matter			27g/kg dry matter	12.9	11.16
30	Influence of bulking agents on CH4, N2O, and NH3 emissions during rapid composting of pig manure from the Chinese Ganqinfen system	China	2014	Measure	25kg pig manure:5kg sawdust	Treatment	CH4	Compost-bedding			g/kg dry weight	1597.16					sawdust	composting reactors 60 L	Composting was performed throughout one month with turning on Days 5, 7, 14, and 22	160L/h	1	75	8.7			350g/kg dry matter			27g/kg dry matter	12.9	35.69
29	Effects of woody peat and superphosphate on compost maturity and gaseous emissions during pig manure composting	China	2017	Measure	control treatment	Treatment	CH4	Compost			% TC	1.55						60L heat insulated composting	28 days with turning over the composting mate_x005f_x0002_rials manually on day 3, 7, 14 and 21.		1	69.74	8.24	2.31					2.68	11.56	20.29
29	Effects of woody peat and superphosphate on compost maturity and gaseous emissions during pig manure composting	China	2017	Measure	superphosphate amended treatment	Treatment	CH4	Compost-addition			% TC	1.17						60L heat insulated composting	28 days with turning over the composting mate_x005f_x0002_rials manually on day 3, 7, 14 and 21.		1	69.74	8.24	2.31					2.68	11.56	13.03
22	Evaluating environmental impacts of pig slurry treatment technologies with a life-cycle perspective, Journal of Cleaner Production	China	2018	Reference	J.W. De Vries, A.J. Aarnink, P.W. Groot Koerkamp, I.J. De Boer Life cycle assessment of segregating fattening pig urine and feces compared to conventional liquid manure management	Housing	CH4			Solid manure	CH4 kg/t manure	0.91
22	Evaluating environmental impacts of pig slurry treatment technologies with a life-cycle perspective, Journal of Cleaner Production	China	2018	Reference	J.W. De Vries, A.J. Aarnink, P.W. Groot Koerkamp, I.J. De Boer Life cycle assessment of segregating fattening pig urine and feces compared to conventional liquid manure management	Housing	CH4			Pig slurry	CH4 kg/t manure	6.54
22	Evaluating environmental impacts of pig slurry treatment technologies with a life-cycle perspective, Journal of Cleaner Production	China	2018	Country Inventory	Ministry of Environmental Protectio (MEP).Guidelines for the Preparation of Atmospheric Ammonia Source Emission Inventories2014	Storage	N2			Solid manure	N2-N kg/kg Nmin	0.3
22	Evaluating environmental impacts of pig slurry treatment technologies with a life-cycle perspective, Journal of Cleaner Production	China	2018	Country Inventory	Ministry of Environmental Protectio (MEP).Guidelines for the Preparation of Atmospheric Ammonia Source Emission Inventories2014	Storage	NO			Solid manure	NO-N kg/kg Nmin	0.01
22	Evaluating environmental impacts of pig slurry treatment technologies with a life-cycle perspective, Journal of Cleaner Production	China	2018	Reference	The average emission coefficient of Hassouna et al.(2008)[Monitoring NH3, N2O, CO2and CH4Emissions during pig solid manure storage — effect of turning] and Wang et al.(2017)[Mitigating greenhouse gas and ammonia emissions from swine manure management: a system analysis.]	Storage	CH4			Solid manure	CH4 kg/t manure	0.72
22	Evaluating environmental impacts of pig slurry treatment technologies with a life-cycle perspective, Journal of Cleaner Production	China	2018	Model-AEIG	This study used the same NO/N2O ratio (1:1) and the N2/N2O ratio (3:1) to calculate the emissions of NO and N2 from digestate mixture and solid digestate stocks	Storage	N2			Digestate	N2-N kg/kg Nmin	0.015
22	Evaluating environmental impacts of pig slurry treatment technologies with a life-cycle perspective, Journal of Cleaner Production	China	2018	Model-AEIG	This study used the same NO/N2O ratio (1:1) and the N2/N2O ratio (3:1) to calculate the emissions of NO and N2 from digestate mixture and solid digestate stocks	Storage	N2			Solid digestate	N2-N kg/kg Nmin	0.144
22	Evaluating environmental impacts of pig slurry treatment technologies with a life-cycle perspective, Journal of Cleaner Production	China	2018	Model-AEIG	This study used the same NO/N2O ratio (1:1) and the N2/N2O ratio (3:1) to calculate the emissions of NO and N2 from digestate mixture and solid digestate stocks	Storage	NO			Digestate	NO-N kg/kg Nmin	0.005
22	Evaluating environmental impacts of pig slurry treatment technologies with a life-cycle perspective, Journal of Cleaner Production	China	2018	Model-AEIG	This study used the same NO/N2O ratio (1:1) and the N2/N2O ratio (3:1) to calculate the emissions of NO and N2 from digestate mixture and solid digestate stocks	Storage	NO			Solid digestate	NO-N kg/kg Nmin	0.048
22	Evaluating environmental impacts of pig slurry treatment technologies with a life-cycle perspective, Journal of Cleaner Production	China	2018	Reference	Hamelin et al. (2011),L. Hamelin, M. Wesnaes, H. Wenzel, B.M. Petersen Environmental consequences of future biogas technologies based on separated slurry ；；； the N2 emitted in field application correspond to three times of direct N2O-N emission.	Application	N2			Solid digestate	N2-N kg/kg Nmin	0.039
22	Evaluating environmental impacts of pig slurry treatment technologies with a life-cycle perspective, Journal of Cleaner Production	China	2018	Reference	Hamelin et al. (2011),L. Hamelin, M. Wesnaes, H. Wenzel, B.M. Petersen Environmental consequences of future biogas technologies based on separated slurry ；；； the N2 emitted in field application correspond to three times of direct N2O-N emission.	Application	N2			Digestate	N2-N kg/kg Nmin	0.026
22	Evaluating environmental impacts of pig slurry treatment technologies with a life-cycle perspective, Journal of Cleaner Production	China	2018	Reference	T. Prapaspongsa, P. Christensen, J.H. Schmidt, M. Thrane LCA of comprehensive pig manure management incorporating integrated technology systems J. Clean. Prod., 18 (14) (2010), pp. 1413-1422	Application	N2			Solid manure	N2-N kg/kg Nmin	0.03
22	Evaluating environmental impacts of pig slurry treatment technologies with a life-cycle perspective, Journal of Cleaner Production	China	2018	Model-AGLMMON	Calculated based on "D. Brockmann, M. Hanhoun, O. Negri, A. HeliasEnvironmental assessment of nutrient recycling from biological pig slurry treatment–impact of fertilizer substitution and field emissions"Bioresour. Technol., 163 (2014), pp. 270-279	Application	NO3-			Solid manure	NO3-N kg/kg Nmin	0.247
22	Evaluating environmental impacts of pig slurry treatment technologies with a life-cycle perspective, Journal of Cleaner Production	China	2018	Model-AGLMMON	Calculated based on "D. Brockmann, M. Hanhoun, O. Negri, A. HeliasEnvironmental assessment of nutrient recycling from biological pig slurry treatment–impact of fertilizer substitution and field emissions"Bioresour. Technol., 163 (2014), pp. 270-279	Application	NO3-			Digestate	NO3-N kg/kg Nmin	0.247
22	Evaluating environmental impacts of pig slurry treatment technologies with a life-cycle perspective, Journal of Cleaner Production	China	2018	Model-AGLMMON	Calculated based on "D. Brockmann, M. Hanhoun, O. Negri, A. HeliasEnvironmental assessment of nutrient recycling from biological pig slurry treatment–impact of fertilizer substitution and field emissions"Bioresour. Technol., 163 (2014), pp. 270-279	Application	NO3-			Solid digestate	NO3-N kg/kg Nmin	0.247
22	Evaluating environmental impacts of pig slurry treatment technologies with a life-cycle perspective, Journal of Cleaner Production	China	2018	Reference	The NO emitted in fifield correspond to 10% of the direct N2O-N emissions.	Application	NO			Solid digestate	NO-N kg/kg Nmin	0.0013
22	Evaluating environmental impacts of pig slurry treatment technologies with a life-cycle perspective, Journal of Cleaner Production	China	2018	Reference	The NO emitted in fifield correspond to 10% of the direct N2O-N emissions.	Application	NO			Digestate	NO-N kg/kg Nmin	0.0008
22	Evaluating environmental impacts of pig slurry treatment technologies with a life-cycle perspective, Journal of Cleaner Production	China	2018	Reference	The NO emitted in fifield correspond to 10% of the direct N2O-N emissions.	Application	NO			Solid manure	NO-N kg/kg Nmin	0.0011
20	Environmental burdens of small-scale intensive pig production in China	China	2021	Reference	Dammgen, U., & Hutchings, N. J. (2008). Emissions of gaseous nitrogen species from manure management: A new approach. Environmental Pollution, 154(3), 488-497. doi:10.1016/j.envpol.2007.03.017	Storage	N2			slurry	N2-N kg / kg Nmineral	0.015
20	Environmental burdens of small-scale intensive pig production in China	China	2021	Country Inventory		Storage	N2			solid	N2-N kg / kg Nmineral	0.3
20	Environmental burdens of small-scale intensive pig production in China	China	2021	Reference	Dammgen, U., & Hutchings, N. J. (2008). Emissions of gaseous nitrogen species from manure management: A new approach. Environmental Pollution, 154(3), 488-497. doi:10.1016/j.envpol.2007.03.017	Storage	NO			slurry	NO-N kg / kg Nmineral	0.005
20	Environmental burdens of small-scale intensive pig production in China	China	2021	Country Inventory		Storage	NO			solid	NO-N kg / kg Nmineral	0.01
19	A life cycle assessment of an enterprise's low-carbon emissions model: The Xinjiang Shihezi pig farm faecal treatment biogas project as a case study	China	2022	Reference	EPA 2021	Housing	NH3			LC solid feces Indoor storage	kgNH3/kgTAN	0.197
19	A life cycle assessment of an enterprise's low-carbon emissions model: The Xinjiang Shihezi pig farm faecal treatment biogas project as a case study	China	2022	Reference	Hoeve et al., 2014b	Housing	NH3			AI feces Deep pit storage	kgNH3/kgTAN	0.25
19	A life cycle assessment of an enterprise's low-carbon emissions model: The Xinjiang Shihezi pig farm faecal treatment biogas project as a case study	China	2022	Reference	De Vries, J.W., Groenestein, C.M., De Boer, I.J.M., 2012. Environmental consequences of processing manure to produce mineral fertilizer and bio-energy. J. Environ. Manag. 102, 173–183.	Housing	CH4			LC solid feces Indoor storage	kgCH4/t manure	0.91
19	A life cycle assessment of an enterprise's low-carbon emissions model: The Xinjiang Shihezi pig farm faecal treatment biogas project as a case study	China	2022	Reference	De Vries, J.W., Groenestein, C.M., De Boer, I.J.M., 2012. Environmental consequences of processing manure to produce mineral fertilizer and bio-energy. J. Environ. Manag. 102, 173–183.	Housing	CH4			AI feces Deep pit storage	kgCH4/t manure	6.54
19	A life cycle assessment of an enterprise's low-carbon emissions model: The Xinjiang Shihezi pig farm faecal treatment biogas project as a case study	China	2022	Reference		Storage	NH3			LC solid feces	kgNH3-N/kgTAN	0.046
19	A life cycle assessment of an enterprise's low-carbon emissions model: The Xinjiang Shihezi pig farm faecal treatment biogas project as a case study	China	2022	Reference		Storage	N2O			LC solid feces	kgN2O-N/kgTAN	0.05
19	A life cycle assessment of an enterprise's low-carbon emissions model: The Xinjiang Shihezi pig farm faecal treatment biogas project as a case study	China	2022	Reference		Storage	N2			LC solid feces	kgN2-N/kgTAN	0.01
19	A life cycle assessment of an enterprise's low-carbon emissions model: The Xinjiang Shihezi pig farm faecal treatment biogas project as a case study	China	2022	Reference		Storage	N2			LC residue	kgN2-N/kgTN	0.048
19	A life cycle assessment of an enterprise's low-carbon emissions model: The Xinjiang Shihezi pig farm faecal treatment biogas project as a case study	China	2022	Reference		Storage	N2			AI slurry-residue (Mixed)	kgN2-N/kgTAN	0.005
19	A life cycle assessment of an enterprise's low-carbon emissions model: The Xinjiang Shihezi pig farm faecal treatment biogas project as a case study	China	2022	Reference		Storage	NO			LC solid feces	kgNO-N/kgTAN	0.3
19	A life cycle assessment of an enterprise's low-carbon emissions model: The Xinjiang Shihezi pig farm faecal treatment biogas project as a case study	China	2022	Reference		Storage	NO			LC residue	kgNO-N/kgTN	0.144
19	A life cycle assessment of an enterprise's low-carbon emissions model: The Xinjiang Shihezi pig farm faecal treatment biogas project as a case study	China	2022	Reference		Storage	NO			AI slurry-residue (Mixed)	kgNO-N/kgTAN	0.015
19	A life cycle assessment of an enterprise's low-carbon emissions model: The Xinjiang Shihezi pig farm faecal treatment biogas project as a case study	China	2022	Reference	Lorie et al., 2011b	Application	NH3	Sow		AI slurry-residue (Mixed)	kg NH3-N/kg TAN	0.138
19	A life cycle assessment of an enterprise's low-carbon emissions model: The Xinjiang Shihezi pig farm faecal treatment biogas project as a case study	China	2022	Reference	The approximate calculation of nitrogen emission factor of LC slurry returned by drip irrigation is 39.516≈40% of AI slurry residue.	Application	NH3	Drip irrigation		LC slurry	kg NH3-N/kg TAN	0.0552
19	A life cycle assessment of an enterprise's low-carbon emissions model: The Xinjiang Shihezi pig farm faecal treatment biogas project as a case study	China	2022	Reference	EF(NO-N):EF(N2O-N)=1:10 (Nemecek and Kägi, 2007)-LCI	Application	NO	Sow		LC solid feces	kg NO-N /kg TN	0.0011
19	A life cycle assessment of an enterprise's low-carbon emissions model: The Xinjiang Shihezi pig farm faecal treatment biogas project as a case study	China	2022	Reference	EF(NO-N):EF(N2O-N)=1:10 (Nemecek and Kägi, 2007)-LCI	Application	NO	Sow		LC residue	kg NO-N /kg TN	0.001
19	A life cycle assessment of an enterprise's low-carbon emissions model: The Xinjiang Shihezi pig farm faecal treatment biogas project as a case study	China	2022	Reference	EF(NO-N):EF(N2O-N)=1:10 (Nemecek and Kägi, 2007)-LCI	Application	NO	Sow		AI slurry-residue (Mixed)	kg NO-N /kg TN	0.0008
19	A life cycle assessment of an enterprise's low-carbon emissions model: The Xinjiang Shihezi pig farm faecal treatment biogas project as a case study	China	2022	Reference	EF(NO-N):EF(N2O-N)=1:10 (Nemecek and Kägi, 2007)-LCI	Application	NO	Drip irrigation		LC slurry	kg NO-N /kg TN	0.00034
19	A life cycle assessment of an enterprise's low-carbon emissions model: The Xinjiang Shihezi pig farm faecal treatment biogas project as a case study	China	2022	Reference	Prapaspongsa et al., 2010b	Application	N2	Sow		LC solid feces	kg N2-N /kg TN	0.03
19	A life cycle assessment of an enterprise's low-carbon emissions model: The Xinjiang Shihezi pig farm faecal treatment biogas project as a case study	China	2022	Reference	EF(N2-N):EF(N2O-N)=3:1 (Lorie et al., 2011b)	Application	N2	Sow		LC residue	kg N2-N /kg TN	0.039
19	A life cycle assessment of an enterprise's low-carbon emissions model: The Xinjiang Shihezi pig farm faecal treatment biogas project as a case study	China	2022	Reference	EF(N2-N):EF(N2O-N)=3:1 (Lorie et al., 2011b)	Application	N2	Sow		AI slurry-residue (Mixed)	kg N2-N /kg TN	0.026
19	A life cycle assessment of an enterprise's low-carbon emissions model: The Xinjiang Shihezi pig farm faecal treatment biogas project as a case study	China	2022	Reference	The approximate calculation of nitrogen emission factor of LC slurry returned by drip irrigation is 39.516≈40% of AI slurry residue.	Application	N2	Drip irrigation		LC slurry	kg N2-N /kg TN	0.0104
18	Environmental, economic and social analysis of peri-urban pig production.	China	2016	Model-NUFER	L. Ma, W.Q. Ma, G.L. Velthof, et al. Modelling nutrient flows in the food chain of China J. Environ. Qual., 39 (2010), pp. 1279-1289	Housing	N2				% TN	5		cement floor
18	Environmental, economic and social analysis of peri-urban pig production.	China	2016	Model-NUFER	L. Ma, W.Q. Ma, G.L. Velthof, et al. Modelling nutrient flows in the food chain of China J. Environ. Qual., 39 (2010), pp. 1279-1289	Housing	N2				% TN	5		leakage floor
18	Environmental, economic and social analysis of peri-urban pig production.	China	2016	Model-NUFER	L. Ma, W.Q. Ma, G.L. Velthof, et al. Modelling nutrient flows in the food chain of China J. Environ. Qual., 39 (2010), pp. 1279-1289	Storage	N2				% TN	5				underground without cover
18	Environmental, economic and social analysis of peri-urban pig production.	China	2016	Model-NUFER	L. Ma, W.Q. Ma, G.L. Velthof, et al. Modelling nutrient flows in the food chain of China J. Environ. Qual., 39 (2010), pp. 1279-1289	Storage	N2				% TN	5				underground with cover
18	Environmental, economic and social analysis of peri-urban pig production.	China	2016	Model-NUFER	L. Ma, W.Q. Ma, G.L. Velthof, et al. Modelling nutrient flows in the food chain of China J. Environ. Qual., 39 (2010), pp. 1279-1289	Storage	N2				% TN	5				aboveground without cover
18	Environmental, economic and social analysis of peri-urban pig production.	China	2016	Model-NUFER	L. Ma, W.Q. Ma, G.L. Velthof, et al. Modelling nutrient flows in the food chain of China J. Environ. Qual., 39 (2010), pp. 1279-1289	Storage	N2				% TN	5				aboveground with cover
18	Environmental, economic and social analysis of peri-urban pig production.	China	2016	Model-NUFER	L. Ma, W.Q. Ma, G.L. Velthof, et al. Modelling nutrient flows in the food chain of China J. Environ. Qual., 39 (2010), pp. 1279-1289	Treatment	N2	Compost			% TN	5
18	Environmental, economic and social analysis of peri-urban pig production.	China	2016	Model-NUFER	L. Ma, W.Q. Ma, G.L. Velthof, et al. Modelling nutrient flows in the food chain of China J. Environ. Qual., 39 (2010), pp. 1279-1289	Treatment	N2	household biogas			% TN	5
18	Environmental, economic and social analysis of peri-urban pig production.	China	2016	Model-NUFER	L. Ma, W.Q. Ma, G.L. Velthof, et al. Modelling nutrient flows in the food chain of China J. Environ. Qual., 39 (2010), pp. 1279-1289	Treatment	N2	industrial biogas			% TN	5
18	Environmental, economic and social analysis of peri-urban pig production.	China	2016	Model-NUFER	L. Ma, W.Q. Ma, G.L. Velthof, et al. Modelling nutrient flows in the food chain of China J. Environ. Qual., 39 (2010), pp. 1279-1289	Treatment	N2	Oxidation pond			% TN	5
18	Environmental, economic and social analysis of peri-urban pig production.	China	2016	Estimate value		Housing	Nitrate leaching				% TN	0		cement floor
18	Environmental, economic and social analysis of peri-urban pig production.	China	2016	Estimate value		Housing	Nitrate leaching				% TN	0		leakage floor
18	Environmental, economic and social analysis of peri-urban pig production.	China	2016	Estimate value		Storage	Nitrate leaching				% TN	0				underground without cover
18	Environmental, economic and social analysis of peri-urban pig production.	China	2016	Estimate value		Storage	Nitrate leaching				% TN	0				underground with cover
18	Environmental, economic and social analysis of peri-urban pig production.	China	2016	Estimate value		Storage	Nitrate leaching				% TN	1				aboveground without cover
18	Environmental, economic and social analysis of peri-urban pig production.	China	2016	Estimate value		Storage	Nitrate leaching				% TN	1				aboveground with cover
18	Environmental, economic and social analysis of peri-urban pig production.	China	2016	Estimate value		Treatment	Nitrate leaching	Compost			% TN	1
18	Environmental, economic and social analysis of peri-urban pig production.	China	2016	Estimate value		Treatment	Nitrate leaching	household biogas			% TN	0
18	Environmental, economic and social analysis of peri-urban pig production.	China	2016	Estimate value		Treatment	Nitrate leaching	industrial biogas			% TN	0
18	Environmental, economic and social analysis of peri-urban pig production.	China	2016	Estimate value		Treatment	Nitrate leaching	Oxidation pond			% TN	0
17	Comparison of nitrogen losses from different manure treatment and application management systems in China.	China	2022	Model-NUFER		Housing	N2	separator		solid-liquid separatted collection	N2-N / % TN	2
17	Comparison of nitrogen losses from different manure treatment and application management systems in China.	China	2022	Model-NUFER		Housing	N2	separator		slurry	N2-N / % TN	2
17	Comparison of nitrogen losses from different manure treatment and application management systems in China.	China	2022	Model-NUFER		Storage	N2			liquid	N2-N / % TN	2
17	Comparison of nitrogen losses from different manure treatment and application management systems in China.	China	2022	Model-NUFER		Storage	N2			slurry	N2-N / % TN	2
17	Comparison of nitrogen losses from different manure treatment and application management systems in China.	China	2022	Model-NUFER		Treatment	N2	Compost			N2O-N / % TN	2
17	Comparison of nitrogen losses from different manure treatment and application management systems in China.	China	2022	Model-NUFER		Treatment	N2	Anaerobic-Aerobic			N2O-N / % TN	80
17	Comparison of nitrogen losses from different manure treatment and application management systems in China.	China	2022	Model-NUFER		Treatment	Nitrate leaching	Compost			Nitrate leaching-N / % TN	1
17	Comparison of nitrogen losses from different manure treatment and application management systems in China.	China	2022	Model-NUFER		Treatment	Nitrate leaching	Anaerobic-Aerobic			Nitrate leaching-N / % TN	0
17	Comparison of nitrogen losses from different manure treatment and application management systems in China.	China	2022	Model-NUFER		Application	N2	Surface application		solid	N2-N / % TN	2
17	Comparison of nitrogen losses from different manure treatment and application management systems in China.	China	2022	Model-NUFER		Application	N2	Incorporation		solid	N2-N / % TN	2
17	Comparison of nitrogen losses from different manure treatment and application management systems in China.	China	2022	Model-NUFER		Application	N2	Surface application		liquid	N2-N / % TN	2
17	Comparison of nitrogen losses from different manure treatment and application management systems in China.	China	2022	Model-NUFER		Application	N2	Injection		liquid	N2-N / % TN	2
17	Comparison of nitrogen losses from different manure treatment and application management systems in China.	China	2022	Model-NUFER		Application	N2	Incorporation		liquid	N2-N / % TN	2
17	Comparison of nitrogen losses from different manure treatment and application management systems in China.	China	2022	Model-NUFER		Application	N2	Bandspreading		liquid	N2-N / % TN	2
17	Comparison of nitrogen losses from different manure treatment and application management systems in China.	China	2022	Model-NUFER		Application	N2	Surface application		slurry	N2-N / % TN	2
17	Comparison of nitrogen losses from different manure treatment and application management systems in China.	China	2022	Model-NUFER		Application	N2	Injection		solid manure	N2-N / % TN	2
17	Comparison of nitrogen losses from different manure treatment and application management systems in China.	China	2022	Model-NUFER		Application	N2	Incorporation		slurry	N2-N / % TN	2
17	Comparison of nitrogen losses from different manure treatment and application management systems in China.	China	2022	Model-NUFER		Application	N2	Bandspreading		solid manure	N2-N / % TN	2
17	Comparison of nitrogen losses from different manure treatment and application management systems in China.	China	2022	Model-NUFER		Application	Nitrate leaching	Surface application		solid	Nitrate leaching-N / % TN	10
17	Comparison of nitrogen losses from different manure treatment and application management systems in China.	China	2022	Model-NUFER		Application	Nitrate leaching	Incorporation		solid	Nitrate leaching-N / % TN	10
17	Comparison of nitrogen losses from different manure treatment and application management systems in China.	China	2022	Model-NUFER		Application	Nitrate leaching	Surface application		liquid	Nitrate leaching-N / % TN	10
17	Comparison of nitrogen losses from different manure treatment and application management systems in China.	China	2022	Model-NUFER		Application	Nitrate leaching	Injection		liquid	Nitrate leaching-N / % TN	10
17	Comparison of nitrogen losses from different manure treatment and application management systems in China.	China	2022	Model-NUFER		Application	Nitrate leaching	Incorporation		liquid	Nitrate leaching-N / % TN	10
17	Comparison of nitrogen losses from different manure treatment and application management systems in China.	China	2022	Model-NUFER		Application	Nitrate leaching	Bandspreading		liquid	Nitrate leaching-N / % TN	10
17	Comparison of nitrogen losses from different manure treatment and application management systems in China.	China	2022	Model-NUFER		Application	Nitrate leaching	Surface application		slurry	Nitrate leaching-N / % TN	10
17	Comparison of nitrogen losses from different manure treatment and application management systems in China.	China	2022	Model-NUFER		Application	Nitrate leaching	Injection		solid manure	Nitrate leaching-N / % TN	10
17	Comparison of nitrogen losses from different manure treatment and application management systems in China.	China	2022	Model-NUFER		Application	Nitrate leaching	Incorporation		slurry	Nitrate leaching-N / % TN	10
17	Comparison of nitrogen losses from different manure treatment and application management systems in China.	China	2022	Model-NUFER		Application	Nitrate leaching	Bandspreading		solid manure	Nitrate leaching-N / % TN	10
15	Efects of additive superphosphate on NH3, N2O and CH4 emissions during pig manure composting. (in Chinese with English abstract)	China	2012	Measure	CK:570kg Pig manure and corn straw	Treatment	CH4	Compost			CH4-C/TC initial%	0.27				without cover	Pig manure and corn straw were mixed according to fresh base weight 6.5:1	Fermentation bin of 1.2 cubic meters	The heap is turned every 7 days, and the turning time is 7th, 14th, 21st, 28th, 35th, 42nd and 49th	natural ventilation	2	121.3	7.72								39.2
15	Efects of additive superphosphate on NH3, N2O and CH4 emissions during pig manure composting. (in Chinese with English abstract)	China	2012	Measure	S5:570kg Pig manure and corn straw + 6kg superphosphate	Treatment	CH4	Compost-addition			CH4-C/TC initial%	0.1				without cover	Pig manure and corn straw were mixed according to fresh base weight 6.5:1	Fermentation bin of 1.2 cubic meters	The heap is turned every 7 days, and the turning time is 7th, 14th, 21st, 28th, 35th, 42nd and 49th	natural ventilation	2	102	7.5								33.8
15	Efects of additive superphosphate on NH3, N2O and CH4 emissions during pig manure composting. (in Chinese with English abstract)	China	2012	Measure	S10:570kg Pig manure and corn straw + 12.4kg superphosphate	Treatment	CH4	Compost-addition			CH4-C/TC initial%	0.21				without cover	Pig manure and corn straw were mixed according to fresh base weight 6.5:1	Fermentation bin of 1.2 cubic meters	The heap is turned every 7 days, and the turning time is 7th, 14th, 21st, 28th, 35th, 42nd and 49th	natural ventilation	2	112.2	7.12								28.9
15	Efects of additive superphosphate on NH3, N2O and CH4 emissions during pig manure composting. (in Chinese with English abstract)	China	2012	Measure	S15:570kg Pig manure and corn straw + 18.6kg superphosphate	Treatment	CH4	Compost-addition			CH4-C/TC initial%	0.31				without cover	Pig manure and corn straw were mixed according to fresh base weight 6.5:1	Fermentation bin of 1.2 cubic meters	The heap is turned every 7 days, and the turning time is 7th, 14th, 21st, 28th, 35th, 42nd and 49th	natural ventilation	2	121.4	7.13								21.8
15	Efects of additive superphosphate on NH3, N2O and CH4 emissions during pig manure composting. (in Chinese with English abstract)	China	2012	Measure	S20:570kg Pig manure and corn straw + 24.8kg superphosphate	Treatment	CH4	Compost-addition			CH4-C/TC initial%	0.28				without cover	Pig manure and corn straw were mixed according to fresh base weight 6.5:1	Fermentation bin of 1.2 cubic meters	The heap is turned every 7 days, and the turning time is 7th, 14th, 21st, 28th, 35th, 42nd and 49th	natural ventilation	2	82.5	7.17								14.3
14	Estimation of NH3 emission factor for pig manure in China.(in Chinese with English abstract)	China	2008	Model-RAINS	Free-range farming	Total	NH3	Stacking mode	Sows		kg NH3/（head·a）	13.38
14	Estimation of NH3 emission factor for pig manure in China.(in Chinese with English abstract)	China	2008	Model-RAINS	Free-range farming	Total	NH3	Biogas model	Sows		kg NH3/（head·a）	8.64
14	Estimation of NH3 emission factor for pig manure in China.(in Chinese with English abstract)	China	2008	Model-RAINS	Free-range farming	Total	NH3	Stacking mode	Growth-Finisher		kg NH3/（head·a）	7.36
14	Estimation of NH3 emission factor for pig manure in China.(in Chinese with English abstract)	China	2008	Model-RAINS	Free-range farming	Total	NH3	Biogas model	Growth-Finisher		kg NH3/（head·a）	4.75
14	Estimation of NH3 emission factor for pig manure in China.(in Chinese with English abstract)	China	2008	Model-RAINS	Free-range farming	Housing	NH3	Stacking mode	Sows		kg NH3/（head·a）	5.4
14	Estimation of NH3 emission factor for pig manure in China.(in Chinese with English abstract)	China	2008	Model-RAINS	Free-range farming	Housing	NH3	Biogas model	Sows		kg NH3/（head·a）	5.4
14	Estimation of NH3 emission factor for pig manure in China.(in Chinese with English abstract)	China	2008	Model-RAINS	Free-range farming	Housing	NH3	Stacking mode	Growth-Finisher		kg NH3/（head·a）	2.97
14	Estimation of NH3 emission factor for pig manure in China.(in Chinese with English abstract)	China	2008	Model-RAINS	Free-range farming	Housing	NH3	Biogas model	Growth-Finisher		kg NH3/（head·a）	2.97
14	Estimation of NH3 emission factor for pig manure in China.(in Chinese with English abstract)	China	2008	Model-RAINS	Free-range farming	Storage	NH3	Stacking mode	Sows		kg NH3/（head·a）	7.38
14	Estimation of NH3 emission factor for pig manure in China.(in Chinese with English abstract)	China	2008	Model-RAINS	Free-range farming	Storage	NH3	Biogas model	Sows		kg NH3/（head·a）	2.46
14	Estimation of NH3 emission factor for pig manure in China.(in Chinese with English abstract)	China	2008	Model-RAINS	Free-range farming	Storage	NH3	Stacking mode	Growth-Finisher		kg NH3/（head·a）	4.06
14	Estimation of NH3 emission factor for pig manure in China.(in Chinese with English abstract)	China	2008	Model-RAINS	Free-range farming	Storage	NH3	Biogas model	Growth-Finisher		kg NH3/（head·a）	1.35
14	Estimation of NH3 emission factor for pig manure in China.(in Chinese with English abstract)	China	2008	Model-RAINS	Free-range farming	Application	NH3	Stacking mode	Sows		kg NH3/（head·a）	0.6
14	Estimation of NH3 emission factor for pig manure in China.(in Chinese with English abstract)	China	2008	Model-RAINS	Free-range farming	Application	NH3	Biogas model	Sows		kg NH3/（head·a）	0.78
14	Estimation of NH3 emission factor for pig manure in China.(in Chinese with English abstract)	China	2008	Model-RAINS	Free-range farming	Application	NH3	Stacking mode	Growth-Finisher		kg NH3/（head·a）	0.33
14	Estimation of NH3 emission factor for pig manure in China.(in Chinese with English abstract)	China	2008	Model-RAINS	Free-range farming	Application	NH3	Biogas model	Growth-Finisher		kg NH3/（head·a）	0.43
14	Estimation of NH3 emission factor for pig manure in China.(in Chinese with English abstract)	China	2008	Model-RAINS	Intensive farming	Total	NH3		Sows		kg NH3/（head·a）	5.76
14	Estimation of NH3 emission factor for pig manure in China.(in Chinese with English abstract)	China	2008	Model-RAINS	Intensive farming	Total	NH3		Growth-Finisher		kg NH3/（head·a）	3.13
14	Estimation of NH3 emission factor for pig manure in China.(in Chinese with English abstract)	China	2008	Model-RAINS	Intensive farming	Total	NH3		piglet		kg NH3/（head·a）	0.57
14	Estimation of NH3 emission factor for pig manure in China.(in Chinese with English abstract)	China	2008	Model-RAINS	Intensive farming	Housing	NH3		Sows		kg NH3/（head·a）	4.23
14	Estimation of NH3 emission factor for pig manure in China.(in Chinese with English abstract)	China	2008	Model-RAINS	Intensive farming	Housing	NH3		Growth-Finisher		kg NH3/（head·a）	2.45
14	Estimation of NH3 emission factor for pig manure in China.(in Chinese with English abstract)	China	2008	Model-RAINS	Intensive farming	Housing	NH3		piglet		kg NH3/（head·a）	0.42
14	Estimation of NH3 emission factor for pig manure in China.(in Chinese with English abstract)	China	2008	Model-RAINS	Intensive farming	Storage	NH3		Sows		kg NH3/（head·a）	0.67
14	Estimation of NH3 emission factor for pig manure in China.(in Chinese with English abstract)	China	2008	Model-RAINS	Intensive farming	Storage	NH3		Growth-Finisher		kg NH3/（head·a）	0.3
14	Estimation of NH3 emission factor for pig manure in China.(in Chinese with English abstract)	China	2008	Model-RAINS	Intensive farming	Storage	NH3		piglet		kg NH3/（head·a）	0.06
14	Estimation of NH3 emission factor for pig manure in China.(in Chinese with English abstract)	China	2008	Model-RAINS	Intensive farming	Application	NH3		Sows		kg NH3/（head·a）	0.85
14	Estimation of NH3 emission factor for pig manure in China.(in Chinese with English abstract)	China	2008	Model-RAINS	Intensive farming	Application	NH3		Growth-Finisher		kg NH3/（head·a）	0.38
14	Estimation of NH3 emission factor for pig manure in China.(in Chinese with English abstract)	China	2008	Model-RAINS	Intensive farming	Application	NH3		piglet		kg NH3/（head·a）	0.08
12	Gaseous emission during the composting of pig feces from Chinese Ganqinfen system.	China	2013	Measure		Treatment	NH3	Compost-bedding			kg/t	3				without cover	pig feces and corn stalks were mixed at the ratio of 7:1 (wet weight)	rotting boxes	turn 2 per week		2	63	8.6			369 g/kg DM	20.7			17.8
12	Gaseous emission during the composting of pig feces from Chinese Ganqinfen system.	China	2013	Measure		Treatment	NH3	Compost-bedding			kg/t	2.9				cover	pig feces and corn stalks were mixed at the ratio of 7:1 (wet weight)	rotting boxes	turn 2 per week		2	63	8.6			369 g/kg DM	20.7			17.8
12	Gaseous emission during the composting of pig feces from Chinese Ganqinfen system.	China	2013	Measure		Treatment	NH3	Compost-bedding			kg/t	3				without cover	pig feces and corn stalks were mixed at the ratio of 7:1 (wet weight)	rotting boxes	turn 1 per week		2	63	8.6			369 g/kg DM	20.7			17.8
12	Gaseous emission during the composting of pig feces from Chinese Ganqinfen system.	China	2013	Measure		Treatment	NH3	Compost-bedding			kg/t	2.6				cover	pig feces and corn stalks were mixed at the ratio of 7:1 (wet weight)	rotting boxes	turn 1 per week		2	63	8.6			369 g/kg DM	20.7			17.8
12	Gaseous emission during the composting of pig feces from Chinese Ganqinfen system.	China	2013	Measure		Treatment	NH3	Compost-bedding			kg/t	2.3				without cover	pig feces and corn stalks were mixed at the ratio of 7:1 (wet weight)	rotting boxes	turn 0 per week		2	63	8.6			369 g/kg DM	20.7			17.8
12	Gaseous emission during the composting of pig feces from Chinese Ganqinfen system.	China	2013	Measure		Treatment	NH3	Compost-bedding			kg/t	1.5				cover	pig feces and corn stalks were mixed at the ratio of 7:1 (wet weight)	rotting boxes	turn 0 per week		2	63	8.6			369 g/kg DM	20.7			17.8
12	Gaseous emission during the composting of pig feces from Chinese Ganqinfen system.	China	2013	Measure		Treatment	N2O	Compost-bedding			kg/t	39				without cover	pig feces and corn stalks were mixed at the ratio of 7:1 (wet weight)	rotting boxes	turn 2 per week		2	63	8.6			369 g/kg DM	20.7			17.8
12	Gaseous emission during the composting of pig feces from Chinese Ganqinfen system.	China	2013	Measure		Treatment	N2O	Compost-bedding			kg/t	35				cover	pig feces and corn stalks were mixed at the ratio of 7:1 (wet weight)	rotting boxes	turn 2 per week		2	63	8.6			369 g/kg DM	20.7			17.8
12	Gaseous emission during the composting of pig feces from Chinese Ganqinfen system.	China	2013	Measure		Treatment	N2O	Compost-bedding			kg/t	38				without cover	pig feces and corn stalks were mixed at the ratio of 7:1 (wet weight)	rotting boxes	turn 1 per week		2	63	8.6			369 g/kg DM	20.7			17.8
12	Gaseous emission during the composting of pig feces from Chinese Ganqinfen system.	China	2013	Measure		Treatment	N2O	Compost-bedding			kg/t	23				cover	pig feces and corn stalks were mixed at the ratio of 7:1 (wet weight)	rotting boxes	turn 1 per week		2	63	8.6			369 g/kg DM	20.7			17.8
12	Gaseous emission during the composting of pig feces from Chinese Ganqinfen system.	China	2013	Measure		Treatment	N2O	Compost-bedding			kg/t	291				without cover	pig feces and corn stalks were mixed at the ratio of 7:1 (wet weight)	rotting boxes	turn 0 per week		2	63	8.6			369 g/kg DM	20.7			17.8
12	Gaseous emission during the composting of pig feces from Chinese Ganqinfen system.	China	2013	Measure		Treatment	N2O	Compost-bedding			kg/t	230				cover	pig feces and corn stalks were mixed at the ratio of 7:1 (wet weight)	rotting boxes	turn 0 per week		2	63	8.6			369 g/kg DM	20.7			17.8
12	Gaseous emission during the composting of pig feces from Chinese Ganqinfen system.	China	2013	Measure		Treatment	CH4	Compost-bedding			kg/t	81				without cover	pig feces and corn stalks were mixed at the ratio of 7:1 (wet weight)	rotting boxes	turn 2 per week		2	63	8.6			369 g/kg DM	20.7			17.8
12	Gaseous emission during the composting of pig feces from Chinese Ganqinfen system.	China	2013	Measure		Treatment	CH4	Compost-bedding			kg/t	83				cover	pig feces and corn stalks were mixed at the ratio of 7:1 (wet weight)	rotting boxes	turn 2 per week		2	63	8.6			369 g/kg DM	20.7			17.8
12	Gaseous emission during the composting of pig feces from Chinese Ganqinfen system.	China	2013	Measure		Treatment	CH4	Compost-bedding			kg/t	84				without cover	pig feces and corn stalks were mixed at the ratio of 7:1 (wet weight)	rotting boxes	turn 1 per week		2	63	8.6			369 g/kg DM	20.7			17.8
12	Gaseous emission during the composting of pig feces from Chinese Ganqinfen system.	China	2013	Measure		Treatment	CH4	Compost-bedding			kg/t	79				cover	pig feces and corn stalks were mixed at the ratio of 7:1 (wet weight)	rotting boxes	turn 1 per week		2	63	8.6			369 g/kg DM	20.7			17.8
12	Gaseous emission during the composting of pig feces from Chinese Ganqinfen system.	China	2013	Measure		Treatment	CH4	Compost-bedding			kg/t	70				without cover	pig feces and corn stalks were mixed at the ratio of 7:1 (wet weight)	rotting boxes	turn 0 per week		2	63	8.6			369 g/kg DM	20.7			17.8
12	Gaseous emission during the composting of pig feces from Chinese Ganqinfen system.	China	2013	Measure		Treatment	CH4	Compost-bedding			kg/t	51				cover	pig feces and corn stalks were mixed at the ratio of 7:1 (wet weight)	rotting boxes	turn 0 per week		2	63	8.6			369 g/kg DM	20.7			17.8
11	Effect of C/N ratio, aeration rate and moisture content on ammonia and greenhouse gas emission during the composting.	China	2011	Measure		Treatment	CH4	Compost-bedding			CH4-C / initiaL C%	7.5					pig manure+corn stalk	composting vessels	turn 4 times totally	intermittent aeration 0.24 L/kg DM.min	2	64.1	8.6			348 g/kg DM	23.6 g/kg DM	1.83 g/kg DM		14.7	21.3
11	Effect of C/N ratio, aeration rate and moisture content on ammonia and greenhouse gas emission during the composting.	China	2011	Measure		Treatment	CH4	Compost-bedding			CH4-C / initiaL C%	3.7					pig manure+corn stalk	composting vessels	turn 4 times totally	intermittent aeration 0.48 L/kg DM.min	2	65.2	8.5			380 g/kg DM	20.8 g/kg DM	1.25 g/kg DM		18.3	26.6
11	Effect of C/N ratio, aeration rate and moisture content on ammonia and greenhouse gas emission during the composting.	China	2011	Measure		Treatment	CH4	Compost-bedding			CH4-C / initiaL C%	0.8					pig manure+corn stalk	composting vessels	turn 4 times totally	intermittent aeration 0.72 L/kg DM.min	2	63.7	8.3			394 g/kg DM	19 g/kg DM	0.9 g/kg DM		20.7	30.6
11	Effect of C/N ratio, aeration rate and moisture content on ammonia and greenhouse gas emission during the composting.	China	2011	Measure		Treatment	CH4	Compost-bedding			CH4-C / initiaL C%	7.2					pig manure+corn stalk	composting vessels	turn 4 times totally	intermittent aeration 0.24 L/kg DM.min	2	71.3	8.5			380 g/kg DM	20.6 g/kg DM	1.48 g/kg DM		18.4	22
11	Effect of C/N ratio, aeration rate and moisture content on ammonia and greenhouse gas emission during the composting.	China	2011	Measure		Treatment	CH4	Compost-bedding			CH4-C / initiaL C%	1.7					pig manure+corn stalk	composting vessels	turn 4 times totally	intermittent aeration 0.48 L/kg DM.min	2	70.6	8.3			401 g/kg DM	19 g/kg DM	1.25 g/kg DM		21.1	28.4
11	Effect of C/N ratio, aeration rate and moisture content on ammonia and greenhouse gas emission during the composting.	China	2011	Measure		Treatment	CH4	Compost-bedding			CH4-C / initiaL C%	4.2					pig manure+corn stalk	composting vessels	turn 4 times totally	intermittent aeration 0.72 L/kg DM.min	2	70.8	8.7			352 g/kg DM	23.5 g/kg DM	2.02 g/kg DM		15	45.9
11	Effect of C/N ratio, aeration rate and moisture content on ammonia and greenhouse gas emission during the composting.	China	2011	Measure		Treatment	CH4	Compost-bedding			CH4-C / initiaL C%	6.4					pig manure+corn stalk	composting vessels	turn 4 times totally	intermittent aeration 0.24 L/kg DM.min	2	75.7	8.4			409 g/kg DM	19.3 g/kg DM	0.9 g/kg DM		21.2	18.4
11	Effect of C/N ratio, aeration rate and moisture content on ammonia and greenhouse gas emission during the composting.	China	2011	Measure		Treatment	CH4	Compost-bedding			CH4-C / initiaL C%	5.7					pig manure+corn stalk	composting vessels	turn 4 times totally	intermittent aeration 0.48 L/kg DM.min	2	76.8	8.6			353 g/kg DM	23.7 g/kg DM	2.25 g/kg DM		14.9	40.3
11	Effect of C/N ratio, aeration rate and moisture content on ammonia and greenhouse gas emission during the composting.	China	2011	Measure		Treatment	CH4	Compost-bedding			CH4-C / initiaL C%	3.8					pig manure+corn stalk	composting vessels	turn 4 times totally	intermittent aeration 0.72 L/kg DM.min	2	74	8.6			376 g/kg DM	20.9 g/kg DM	1.64 g/kg DM		18	35.3
10	Effect of turning and covering on greenhouse gas and ammonia emissions during the winter composting.	China	2011	Measure		Treatment	CH4	Compost-bedding			CH4-C / initiaL C%	0.14				uncovered	pig manure+corn stalk		turn 1 per week;		1	71.8				361 g/kg DM		4.62 g/kg DM	27.9 g/kg DM	12.9
10	Effect of turning and covering on greenhouse gas and ammonia emissions during the winter composting.	China	2011	Measure		Treatment	CH4	Compost-bedding			CH4-C / initiaL C%	0.22				covered	pig manure+corn stalk		turn 1 per week;		1	71.8				361 g/kg DM		4.62 g/kg DM	27.9 g/kg DM	12.9
10	Effect of turning and covering on greenhouse gas and ammonia emissions during the winter composting.	China	2011	Measure		Treatment	CH4	Compost-bedding			CH4-C / initiaL C%	0.25				uncovered	pig manure+corn stalk		turn 2 per week		1	71.8				361 g/kg DM		4.62 g/kg DM	27.9 g/kg DM	12.9
10	Effect of turning and covering on greenhouse gas and ammonia emissions during the winter composting.	China	2011	Measure		Treatment	CH4	Compost-bedding			CH4-C / initiaL C%	0.36				covered	pig manure+corn stalk		turn 2 per week		1	71.8				361 g/kg DM		4.62 g/kg DM	27.9 g/kg DM	12.9
10	Effect of turning and covering on greenhouse gas and ammonia emissions during the winter composting.	China	2011	Measure		Treatment	CH4	Compost-bedding			CH4-C / initiaL C%	0.5				uncovered	pig manure+corn stalk		turn 0 per week		1	71.8				361 g/kg DM		4.62 g/kg DM	27.9 g/kg DM	12.9
10	Effect of turning and covering on greenhouse gas and ammonia emissions during the winter composting.	China	2011	Measure		Treatment	CH4	Compost-bedding			CH4-C / initiaL C%	0.76				covered	pig manure+corn stalk		turn 0 per week		1	71.8				361 g/kg DM		4.62 g/kg DM	27.9 g/kg DM	12.9
9	Effects of aeration method and aeration rate on greenhouse gas emissions during composting of pig feces in pilot scale.	China	2015	Measure		Treatment	CH4	Compost-bedding			CH4-C / initiaL C%	0.24					pig feces:corn stalks	rotting box	turn 4 times totally	without aeration	2	63.6				367	21.2 g/kg DM	5.7 g/kg DM		17.3
9	Effects of aeration method and aeration rate on greenhouse gas emissions during composting of pig feces in pilot scale.	China	2015	Measure		Treatment	CH4	Compost-bedding			CH4-C / initiaL C%	0.32					pig feces:corn stalks	rotting box	turn 4 times totally	continuous aeration 0.18 L/kg DM.min	2	63.6				367	21.2 g/kg DM	5.7 g/kg DM		17.3
9	Effects of aeration method and aeration rate on greenhouse gas emissions during composting of pig feces in pilot scale.	China	2015	Measure		Treatment	CH4	Compost-bedding			CH4-C / initiaL C%	0.09					pig feces:corn stalks	rotting box	turn 4 times totally	continuous aeration 0.36 L/kg DM.min	2	63.6				367	21.2 g/kg DM	5.7 g/kg DM		17.3
9	Effects of aeration method and aeration rate on greenhouse gas emissions during composting of pig feces in pilot scale.	China	2015	Measure		Treatment	CH4	Compost-bedding			CH4-C / initiaL C%	0.01					pig feces:corn stalks	rotting box	turn 4 times totally	continuous aeration 0.54 L/kg DM.min	2	63.6				367	21.2 g/kg DM	5.7 g/kg DM		17.3
9	Effects of aeration method and aeration rate on greenhouse gas emissions during composting of pig feces in pilot scale.	China	2015	Measure		Treatment	CH4	Compost-bedding			CH4-C / initiaL C%	0.03					pig feces:corn stalks	rotting box	turn 4 times totally	intermittent aeration 0.54 L/kg DM.min	2	63.6				367	21.2 g/kg DM	5.7 g/kg DM		17.3
6	Mitigation of ammonia, nitrous oxide and methane emissions from manure management chains: a meta-analysis and integrated assessment.	China	2014	EMEP/EEA, 2013		Housing	NH3			liquid	% of TAN	28
6	Mitigation of ammonia, nitrous oxide and methane emissions from manure management chains: a meta-analysis and integrated assessment.	China	2014	EMEP/EEA, 2013		Housing	NH3			solid	% of TAN	27
6	Mitigation of ammonia, nitrous oxide and methane emissions from manure management chains: a meta-analysis and integrated assessment.	China	2014	EMEP/EEA, 2013		Storage	NH3			liquid	% of TAN	20
6	Mitigation of ammonia, nitrous oxide and methane emissions from manure management chains: a meta-analysis and integrated assessment.	China	2014	EMEP/EEA, 2013		Storage	NH3			liquid	% of TAN	40
6	Mitigation of ammonia, nitrous oxide and methane emissions from manure management chains: a meta-analysis and integrated assessment.	China	2014	EMEP/EEA, 2013		Storage	NH3			solid	% of TAN	27
6	Mitigation of ammonia, nitrous oxide and methane emissions from manure management chains: a meta-analysis and integrated assessment.	China	2014	EMEP/EEA, 2013		Storage	NH3			solid	% of TAN	81
6	Mitigation of ammonia, nitrous oxide and methane emissions from manure management chains: a meta-analysis and integrated assessment.	China	2014	EMEP/EEA, 2013		Storage	N2			liquid	% TN	1
6	Mitigation of ammonia, nitrous oxide and methane emissions from manure management chains: a meta-analysis and integrated assessment.	China	2014	EMEP/EEA, 2013		Storage	NOx			liquid	% TN	0.3
6	Mitigation of ammonia, nitrous oxide and methane emissions from manure management chains: a meta-analysis and integrated assessment.	China	2014	EMEP/EEA, 2013		Storage	NOx			solid	% TN	0.3
6	Mitigation of ammonia, nitrous oxide and methane emissions from manure management chains: a meta-analysis and integrated assessment.	China	2014	Expert assessment		Storage	NOx			liquid	% TN	0.3
6	Mitigation of ammonia, nitrous oxide and methane emissions from manure management chains: a meta-analysis and integrated assessment.	China	2014	Expert assessment		Storage	NOx			solid	% TN	0.3
6	Mitigation of ammonia, nitrous oxide and methane emissions from manure management chains: a meta-analysis and integrated assessment.	China	2014	IPCC, 2006		Storage	CH4			liquid	kg head-1 yr-1	7.9
5	Greenhouse gas emissions from swine barns of various production stages in suburban Beijing, China. Atmos. Environ. 2007, 41(11):2391-2399.	China	2007	Measure		Housing	N2O	separator	Fattening		g AU-1d-1	0.86		Partial slat	Manure removed twice a day					natural ventilation
5	Greenhouse gas emissions from swine barns of various production stages in suburban Beijing, China. Atmos. Environ. 2007, 41(11):2391-2399.	China	2007	Measure		Housing	N2O	separator	Nursery		g AU-1d-1	1.29		Full slat crate	Flushed twice a day					natural ventilation
5	Greenhouse gas emissions from swine barns of various production stages in suburban Beijing, China. Atmos. Environ. 2007, 41(11):2391-2399.	China	2007	Measure		Housing	N2O	separator	Gestation		g AU-1d-1	0.75		Partial slat	Manure removed twice a day					natural ventilation
5	Greenhouse gas emissions from swine barns of various production stages in suburban Beijing, China. Atmos. Environ. 2007, 41(11):2391-2399.	China	2007	Measure		Housing	N2O	separator	Farrowing		g AU-1d-1	0.54		Full slat crate	Removed as produced					natural ventilation
5	Greenhouse gas emissions from swine barns of various production stages in suburban Beijing, China. Atmos. Environ. 2007, 41(11):2391-2399.	China	2007	Measure		Housing	CH4	separator	Fattening		g AU-1d-1	32.1		Full slat crate	Manure removed twice a day					natural ventilation
5	Greenhouse gas emissions from swine barns of various production stages in suburban Beijing, China. Atmos. Environ. 2007, 41(11):2391-2399.	China	2007	Measure		Housing	CH4	separator	Nursery		g AU-1d-1	58.4		Partial slat	Flushed twice a day					natural ventilation
5	Greenhouse gas emissions from swine barns of various production stages in suburban Beijing, China. Atmos. Environ. 2007, 41(11):2391-2399.	China	2007	Measure		Housing	CH4	separator	Gestation		g AU-1d-1	9.6		Full slat crate	Manure removed twice a day					natural ventilation
5	Greenhouse gas emissions from swine barns of various production stages in suburban Beijing, China. Atmos. Environ. 2007, 41(11):2391-2399.	China	2007	Measure		Housing	CH4	separator	Farrowing		g AU-1d-1	9.6		Partial slat	Removed as produced					natural ventilation
4	Ammonia, methane, and carbon dioxide concentrations and emissions of a hoop grower-finisher swine barn.	China	2009	Measure	Chopped cornstalks. New bedding was added (every 5 to 10 d) when the bedded area showed sign of being wet.	Housing	NH3	bedding-hoop structure			kg AU-1y-1	100
4	Ammonia, methane, and carbon dioxide concentrations and emissions of a hoop grower-finisher swine barn.	China	2009	Measure	Chopped cornstalks. New bedding was added (every 5 to 10 d) when the bedded area showed sign of being wet.	Housing	NH3	bedding-hoop structure			kg AU-1y-1	148
4	Ammonia, methane, and carbon dioxide concentrations and emissions of a hoop grower-finisher swine barn.	China	2009	Measure	Chopped cornstalks. New bedding was added (every 5 to 10 d) when the bedded area showed sign of being wet.	Housing	CH4	bedding-hoop structure			kg AU-1y-1	25.2
4	Ammonia, methane, and carbon dioxide concentrations and emissions of a hoop grower-finisher swine barn.	China	2009	Measure	Chopped cornstalks. New bedding was added (every 5 to 10 d) when the bedded area showed sign of being wet.	Housing	CH4	bedding-hoop structure			kg AU-1y-1	47.1
1	Changes in pig production in China and their effects on nitrogen and phosphorus use and losses.	China	2014	Reference：Food and agriculture organization (FAO). http://faostat.fao.org/ site/291/default.aspx. 2013.	Scenario S1：Adoption of Low-Emission Pig Housing and Manure Storage Facilities；Scenario S6 ：Combination of S1, S2, S3, S4, S5, and S6.（Industrial farm）	Housing	N2				% TN	5
1	Changes in pig production in China and their effects on nitrogen and phosphorus use and losses.	China	2014	Reference：Food and agriculture organization (FAO). http://faostat.fao.org/ site/291/default.aspx. 2013.	Scenario S1：Adoption of Low-Emission Pig Housing and Manure Storage Facilities；Scenario S6 ：Combination of S1, S2, S3, S4, S5, and S6.（Medium farm）	Housing	N2				% TN	5
1	Changes in pig production in China and their effects on nitrogen and phosphorus use and losses.	China	2014	Reference：Food and agriculture organization (FAO). http://faostat.fao.org/ site/291/default.aspx. 2013.	Scenario S2：Improved Manure and Fertilizer Management.；Scenario S3：A Ban on Manure Discharge.；Scenario S4：Improved Herd Management；Scenario S5：Precision Feeding with Improved Feed(Industrial farm)	Housing	N2				% TN	5
1	Changes in pig production in China and their effects on nitrogen and phosphorus use and losses.	China	2014	Reference：Food and agriculture organization (FAO). http://faostat.fao.org/ site/291/default.aspx. 2013.	Scenario S2：Improved Manure and Fertilizer Management.；Scenario S3：A Ban on Manure Discharge.；Scenario S4：Improved Herd Management；Scenario S5：Precision Feeding with Improved Feed(Medium farm)	Housing	N2				% TN	5
1	Changes in pig production in China and their effects on nitrogen and phosphorus use and losses.	China	2014	Reference：Food and agriculture organization (FAO). http://faostat.fao.org/ site/291/default.aspx. 2013.	Scenario S1：Adoption of Low-Emission Pig Housing and Manure Storage Facilities；Scenario S6 ：Combination of S1, S2, S3, S4, S5, and S6.（Industrial farm）	Housing	NO3-				% TN	0
1	Changes in pig production in China and their effects on nitrogen and phosphorus use and losses.	China	2014	Reference：Food and agriculture organization (FAO). http://faostat.fao.org/ site/291/default.aspx. 2013.	Scenario S1：Adoption of Low-Emission Pig Housing and Manure Storage Facilities；Scenario S6 ：Combination of S1, S2, S3, S4, S5, and S6.（Medium farm）	Housing	NO3-				% TN	0
1	Changes in pig production in China and their effects on nitrogen and phosphorus use and losses.	China	2014	Reference：Food and agriculture organization (FAO). http://faostat.fao.org/ site/291/default.aspx. 2013.	Scenario S2：Improved Manure and Fertilizer Management.；Scenario S3：A Ban on Manure Discharge.；Scenario S4：Improved Herd Management；Scenario S5：Precision Feeding with Improved Feed(Industrial farm)	Housing	NO3-				% TN	0
1	Changes in pig production in China and their effects on nitrogen and phosphorus use and losses.	China	2014	Reference：Food and agriculture organization (FAO). http://faostat.fao.org/ site/291/default.aspx. 2013.	Scenario S2：Improved Manure and Fertilizer Management.；Scenario S3：A Ban on Manure Discharge.；Scenario S4：Improved Herd Management；Scenario S5：Precision Feeding with Improved Feed(Medium farm)	Housing	NO3-				% TN	0

## Sheet: Sample points data
No.	Experiment Year (s)	Region	Climate	Mean annual air temperature (°C)	Mean annual precipitation (mm)	Location	Longitude	Latitude	Soil texture	BD (g cm-3)	Soil pH	Soil WFPS (%)	TOC/SOC (g kg-1)	NH4+-N (mg kg-1)	NO3_-N (mg kg-1)
1	2017	East	Subtropical monsoon	18.8	1739.8	Nanping, Fujian	118°08'E	26°41'N	Clay loam	1.1	4.4	52.7721	9.34	10.4873	31.7489
2	2019	Central south	Subtropical monsoon	17.5	1330	Changsha, Hunan	113°19'E	28°32'N	Clay loam	1.4	3.98	43	9.49	7.4	0.9
3	2018	Central south	Subtropical monsoon	17.5	1433	Jinjing, Changsha, Hunan	113°20'E	28°35'N	Clay loam	1.26	4.16	55.1089	9.82	55.1471	12.7442
4	2013	Central south	Subtropical monsoon	18	1164	Zhangjiachong, Zigui, Hubei	110°56'E	30°47'N	Sandy loam	1.42	6.35	60.65	21.17	10.5873	19.5799
5	2018	East	Subtropical monsoon	16	1139	Linhu, Suzhou, Jiangsu	120°48'E	31°12'N	Silty clay loam	1.25	5.6	72.6027	20.3	8.9	15.56
6	2010	East	Subtropical monsoon	16	1139	Suzhou, Jiangsu	120°38'E	31°16'N	Silty clay loam	1.22	6.6	72	21.5	16.4	4.7
7	2017	Southwest	Subtropical monsoon	17.2	732	Yanting, Sichuan	105°27'E	31°16'N	Silty clay loam	1.04	8.53	66.7664	19.36	7.06699	30.5012
8	2014	East	Subtropical monsoon	16	1139	Dongshan, Suzhou, Jiangsu	120°25'E	31°24'N	Clay loam	1.2	5.95	66.5	11.4	6.28349	8.80602
9	2013	East	Subtropical monsoon	15.5	1038	Changshu, Jiangsu	120°41'E	31°32'N	Silty clay	1.11	7.35	62.8054	20.3	11.5711	6.16803
10	2020	East	Subtropical monsoon	15.6	1100	Nanjing, Jiangsu	118°42'E	32°14'N	Loam clay	1.36	6.57	73.9535	25	13.48	6.11
11	2009	East	Subtropical monsoon	15.9	924	Jiangdu, Jiangsu	119°42'E	32°35'N	Sandy loam	1.16	8	70.0095	18.4	5.26159	4.40405
12	2017	East	Subtropical monsoon	14.7	1140	Xiaoji, Jiangdu, Jiangsu	119°42'E	32°35'N	Silt loam	1.13	5.95	49.8225	16.8	4.7	60.5
13	2016	East	Subtropical monsoon	15.2	1045	Dafeng, Yancheng, Jiangsu	120°45'E	33°19'N	Sandy loam	1.28	8.2	34.6315	11.8	9.63	6.21
14	2019	East	Subtropical monsoon	14.7	1031	Yancheng, Jiangsu	120°11'E	33°27'N	Sandy loam	1.23	7.43	55.74	15.45	4.99	38.34
15	2011	North	Temperate continental	14.8	562	Yongji, Shanxi	110°42'E	34°55'N	Clay loam	1.17	8.7	61	11.3	2.2	4
16	2012	Central south	Temperate continental monsoon	13.9	588.8	Fengqiu, Henan	114°24'E	35°00'N	Sandy loam	1.35	8.53	56.9548	4.43	0.72	5.15
17	2016	Northwest	Temperate continental monsoon	9.4	560	Changwu, Shaanxi	107°40'E	35°12'N	Loam	1.3	8.4	41.2922	6.5	7.14286	34.9206
18	2012	East	Temperate continental monsoon	13	586	Huantai, Shandong	117°59'E	36°58'N	Silt loam	1.42	8.29	39.8011	10.28	3.30275	9.03935
19	2019	Northwest	Plateau alpine	-0.3	484	Haibei, Qinghai	101°21'E	37°37'N	Loam	1.25	7.9	31.3	24.6	1.2	8.6
20	2017	East	Temperate continental monsoon	11.9	664	Penglai, Shandong	120°45'E	37°49'N	Sandy loam	1.39	6.7	64	10.6	14.0235	20.1566
21	2018	North	Temperate monsoon	13	560	Luancheng, Hebei	114°16'E	37°53'N	Sandy silt loam	1.11	7.75	14.7449	11.02	1.25	0.88
22	2017	North	Temperate continental monsoon	12.9	519	Wangdu, Hebei	115°05'E	38°01'N	Sandy loam	1.26	8.8	69.8031	8.7	5.74	37.5
23	2017	North	Temperate continental monsoon	12.33	600	Shangzhuang, Beijing	116°28'E	39°48'N	Clay loam	1.31	8.1	59.2014	7.1	0.496942	16.2713
24	2011	North	Temperate monsoon	8	600	Beijing	116°16'E	40°04'N	Silt loam	1.34	7.87	44.5935	12.354	14.1875	24.8344
25	2020	North	Temperate continental monsoon	10.1	732	Qianxi, Hebei	118°18'E	40°12'N	Sandy loam	1.4	7.03	81.1013	6.9	2.9	9.1
26	2014	North	Temperate monsoon	8.7	610	Jinzhou, Liaoning	121°21'E	41°08'N	Loam	1.33	7.1	60	13.166	4.15735	10.0179
27	2015	North	Temperate continental monsoon	1.4	380	Guyuan, Hebei	115°40'E	41°46'N	Sandy loam	1.25	7.86	35.3254	14.72	1.96012	9.02873
28	2013	North	Temperate continental monsoon	5.6	594.8	Gongzhuling, Jilin	124°48'E	43°30'N	Loam clay	1.31	6.2	51.1	15.254	2.25256	6.91986
29	2017	Northwest	Temperate continental	9.28	166.35	Xinjiang	86°02'E	44°18'N	Clay	1.42	7.96	47.0635	9.396	24.5941	40.8844
30	2012	North	Temperate continental monsoon	3.5	533	Harbin, Heilongjiang	126°37'E	45°41'N	Clay loam	1.05	7.12	39	16.2	7.1	6.4
31	2014	North	Temperate continental monsoon	1.5	550	Hailun, Heilongjiang	126°38'E	47°26'N	Clay loam	1.03	5.9	43.9501	27.5	2.25281	13.6225
32	2009	North	Temperate continental monsoon	1.9	555	Sanjiang Plain, Heilongjiang	133°31'E	47°35'N	Silty clay	0.98	6.12	47.5717	36.8	6.81	20.27
